# Supplementary material for: Plasmalogens Eliminate Aging-Associated Synaptic Defects and Microglia-Mediated Neuroinflammation in Mice
Source: Front Mol Biosci. 2022 Feb 23;9:815320. doi: 10.3389/fmolb.2022.815320 (PMC8906368; doi:10.3389/fmolb.2022.815320)
Supplement: Supplementary file 2 [file Table1.XLSX]

## Sheet: Sheet1
Gene ID	Gene name	Description	aged Pls-fed 1_count	aged Pls-fed 2_count	aged Pls-fed 3_count	aged Pls-fed 4_count	aged control 1_count	aged control 2_count	aged control 3_count	aged control 4_count	aged Pls-fed 1_FPKM	aged Pls-fed 2_FPKM	aged Pls-fed 3_FPKM	aged Pls-fed 4_FPKM	aged control 1_FPKM	aged control 2_FPKM	aged control 3_FPKM	aged control 4_FPKM	Group_aged Pls-fed	Group_aged control	Ratio value (aged Pls-fed VS. aged control)	P value
ENSMUSG00000025894	Aasdhppt	aminoadipate-semialdehyde dehydrogenase-phosphopantetheinyl transferase [Source:MGI Symbol;Acc:MGI:1914868]	249	230	453	234	414	443	609	490	1.89917	1.8949	3.75495	1.93375	3.59193	3.86248	4.27607	4.24945	2.37069	3.99498	0.593417	0.000198335
ENSMUSG00000030249	Abcc9	ATP-binding cassette, sub-family C (CFTR/MRP), member 9 [Source:MGI Symbol;Acc:MGI:1352630]	192	168	150	155	225	242	283	161	1.01549	0.959796	0.862205	0.888237	1.3537	1.46315	1.37793	0.968221	0.931433	1.29075	0.721621	0.00947848
ENSMUSG00000000686	Abhd15	abhydrolase domain containing 15 [Source:MGI Symbol;Acc:MGI:1914727]	28	27	27	34	39	55	43	32	0.412092	0.429236	0.431856	0.542168	0.652939	0.925342	0.582595	0.535509	0.453838	0.674096	0.673254	0.0363219
ENSMUSG00000040997	Abhd4	abhydrolase domain containing 4 [Source:MGI Symbol;Acc:MGI:1915938]	608	559	478	533	1420	763	779	503	4.22922	4.20013	3.6135	4.01704	11.236	6.0671	4.98837	3.97831	4.01497	6.56744	0.611346	0.00232419
ENSMUSG00000058835	Abi1	abl-interactor 1 [Source:MGI Symbol;Acc:MGI:104913]	2113	2020	1840	1935	1889	2727	3235	2243	7.03062	7.26006	6.65358	6.97584	7.14976	10.3724	9.90907	8.48588	6.98003	8.97928	0.777348	0.0051972
ENSMUSG00000111339	AC139579.1	post-GPI attachment to proteins 2	3	0	4	3	0	0	0	0	0.26925	0	0.390056	0.291728	0	0	0	0	0.237759	0	Inf	0.00754355
ENSMUSG00000118449	AC241534.1	novel transcript	30	27	17	24	37	43	36	32	0.489187	0.475571	0.301263	0.424024	0.686317	0.801541	0.540409	0.593315	0.422511	0.655395	0.644666	0.028287
ENSMUSG00000062480	Acat3	acetyl-Coenzyme A acetyltransferase 3 [Source:MGI Symbol;Acc:MGI:109182]	195	170	187	187	88	127	126	144	2.8286	2.66367	2.94796	2.93901	1.45206	2.10591	1.68256	2.37505	2.84481	1.90389	1.4942	0.0086766
ENSMUSG00000038007	Acer2	alkaline ceramidase 2 [Source:MGI Symbol;Acc:MGI:1920932]	181	163	162	143	342	256	268	171	1.26161	1.22724	1.22717	1.07995	2.71167	2.0398	1.71967	1.35524	1.19899	1.9566	0.612795	0.00074516
ENSMUSG00000002103	Acp2	acid phosphatase 2, lysosomal [Source:MGI Symbol;Acc:MGI:87882]	1565	1023	1468	1604	819	1389	1010	907	7.60362	5.36879	7.75131	8.44368	4.52642	7.71451	4.51743	5.01056	7.29185	5.44223	1.33986	0.0428419
ENSMUSG00000025964	Adam23	a disintegrin and metallopeptidase domain 23 [Source:MGI Symbol;Acc:MGI:1345162]	1363	2260	1282	2318	1111	1122	1447	1112	3.54754	6.35381	3.62629	6.53681	3.28935	3.33829	3.46708	3.29086	5.01611	3.34639	1.49896	0.00483496
ENSMUSG00000022893	Adamts1	a disintegrin-like and metallopeptidase (reprolysin type) with thrombospondin type 1 motif, 1 [Source:MGI Symbol;Acc:MGI:109249]	347	357	343	316	658	464	408	283	2.98725	3.31974	3.20907	2.94748	6.44366	4.56625	3.23345	2.77014	3.11588	4.25337	0.732568	0.0294801
ENSMUSG00000006403	Adamts4	a disintegrin-like and metallopeptidase (reprolysin type) with thrombospondin type 1 motif, 4 [Source:MGI Symbol;Acc:MGI:1339949]	373	303	278	358	194	171	212	164	2.5148	2.20664	2.03696	2.61516	1.48785	1.31793	1.31581	1.25722	2.34339	1.3447	1.74268	9.84e-06
ENSMUSG00000066113	Adamtsl1	ADAMTS-like 1 [Source:MGI Symbol;Acc:MGI:1924989]	245	179	138	210	123	122	184	102	0.756115	0.596719	0.462854	0.702202	0.431811	0.430408	0.522762	0.357928	0.629472	0.435727	1.44465	0.0276814
ENSMUSG00000015850	Adamtsl4	ADAMTS-like 4 [Source:MGI Symbol;Acc:MGI:2389008]	133	109	118	183	63	86	86	74	1.27159	1.12568	1.22608	1.89568	0.685167	0.939922	0.756932	0.80445	1.37976	0.796618	1.73202	0.00152186
ENSMUSG00000022994	Adcy6	adenylate cyclase 6 [Source:MGI Symbol;Acc:MGI:87917]	848	648	670	784	450	532	644	479	3.36586	2.77824	2.89014	3.37161	2.03179	2.41386	2.35315	2.16177	3.10146	2.24014	1.38449	0.00304545
ENSMUSG00000025026	Add3	adducin 3 (gamma) [Source:MGI Symbol;Acc:MGI:1351615]	1930	1700	2006	1781	2577	2380	2907	1534	6.90096	6.56592	7.79518	6.89981	10.4817	9.72812	9.56888	6.23664	7.04047	9.00383	0.781941	0.0134771
ENSMUSG00000060470	Adgrg3	adhesion G protein-coupled receptor G3 [Source:MGI Symbol;Acc:MGI:1859670]	5	1	2	3	18	11	3	8	0.0291265	0.00629196	0.0126593	0.0189361	0.119271	0.0732463	0.0160879	0.0529859	0.0167534	0.0653977	0.256178	0.00528917
ENSMUSG00000039167	Adgrl4	adhesion G protein-coupled receptor L4 [Source:MGI Symbol;Acc:MGI:2655562]	463	424	368	411	654	683	644	454	3.39427	3.35758	2.93195	3.26459	5.45391	5.72382	4.34626	3.78438	3.2371	4.82709	0.67061	0.000193551
ENSMUSG00000030790	Adm	adrenomedullin [Source:MGI Symbol;Acc:MGI:108058]	22	23	37	16	42	34	46	33	0.677465	0.76504	1.23826	0.533843	1.47123	1.19686	1.30401	1.15543	0.803652	1.28188	0.626931	0.0251044
ENSMUSG00000042558	Adprhl2	ADP-ribosylhydrolase like 2 [Source:MGI Symbol;Acc:MGI:2140364]	399	394	239	378	234	296	249	233	5.23861	5.5877	3.41023	5.37719	3.4948	4.44257	3.00958	3.47834	4.90343	3.60632	1.35968	0.0416752
ENSMUSG00000020473	Aebp1	AE binding protein 1 [Source:MGI Symbol;Acc:MGI:1197012]	97	65	256	146	75	88	75	59	1.18406	0.857063	3.39616	1.93099	1.04143	1.22797	0.842811	0.8189	1.84207	0.982779	1.87435	0.0161259
ENSMUSG00000023827	Agpat4	1-acylglycerol-3-phosphate O-acyltransferase 4 (lysophosphatidic acid acyltransferase, delta) [Source:MGI Symbol;Acc:MGI:1915512]	884	940	1200	947	678	715	857	751	13.247	15.2156	19.543	15.3758	11.5574	12.2482	11.8225	12.7961	15.8453	12.1061	1.30888	0.0153162
ENSMUSG00000037692	Ahdc1	AT hook, DNA binding motif, containing 1 [Source:MGI Symbol;Acc:MGI:2444218]	308	396	283	379	169	172	212	132	1.22055	1.69509	1.2188	1.62729	0.761823	0.779171	0.773399	0.594773	1.44043	0.727291	1.98054	8.36e-07
ENSMUSG00000001864	Aif1l	allograft inflammatory factor 1-like [Source:MGI Symbol;Acc:MGI:1919598]	150	143	146	134	80	73	120	113	1.31781	1.35704	1.39398	1.27552	0.7995	0.733135	0.970529	1.12879	1.33609	0.907988	1.47148	0.0139099
ENSMUSG00000000731	Aire	autoimmune regulator (autoimmune polyendocrinopathy candidiasis ectodermal dystrophy) [Source:MGI Symbol;Acc:MGI:1338803]	5	5	3	4	19	17	13	5	0.0423097	0.0456992	0.0275837	0.0366698	0.182877	0.164431	0.101263	0.0481017	0.0380656	0.124168	0.306565	0.00173122
ENSMUSG00000041323	Ak7	adenylate kinase 7 [Source:MGI Symbol;Acc:MGI:1926051]	34	16	56	53	24	5	5	4	0.411978	0.209418	0.737447	0.695825	0.330812	0.0692645	0.0557735	0.0551041	0.513667	0.127738	4.02124	0.000557496
ENSMUSG00000025270	Alas2	aminolevulinic acid synthase 2, erythroid [Source:MGI Symbol;Acc:MGI:87990]	30	39	34	33	153	64	54	24	0.510463	0.716811	0.628731	0.608392	2.96143	1.24488	0.845868	0.46434	0.616099	1.37913	0.446731	0.00740783
ENSMUSG00000032807	Alox12b	arachidonate 12-lipoxygenase, 12R type [Source:MGI Symbol;Acc:MGI:1274782]	201	199	177	163	331	331	265	212	4.4964	4.80856	4.30312	3.95072	8.42287	8.46439	5.45731	5.39234	4.3897	6.93423	0.633049	0.00072156
ENSMUSG00000028766	Alpl	alkaline phosphatase, liver/bone/kidney [Source:MGI Symbol;Acc:MGI:87983]	135	105	183	101	75	48	95	77	1.60506	1.34847	2.36456	1.30107	1.01434	0.652369	1.03978	1.04092	1.65479	0.936853	1.76633	0.00288616
ENSMUSG00000075232	Amd1	S-adenosylmethionine decarboxylase 1 [Source:MGI Symbol;Acc:MGI:88004]	1538	89	18	1312	81	71	107	206	16.6811	1.04268	0.212167	15.4178	0.999351	0.880288	1.06836	2.54044	8.33845	1.37211	6.0771	0.00188566
ENSMUSG00000031543	Ank1	ankyrin 1, erythroid [Source:MGI Symbol;Acc:MGI:88024]	825	700	368	875	911	750	1180	982	1.71679	1.57346	0.832251	1.97284	2.15649	1.78412	2.26053	2.32353	1.52384	2.13117	0.715025	0.0149809
ENSMUSG00000030909	Anks4b	ankyrin repeat and sterile alpha motif domain containing 4B [Source:MGI Symbol;Acc:MGI:1919324]	8	3	2	1	5	9	5	16	0.111548	0.045186	0.0303044	0.0151151	0.0793152	0.143457	0.0641825	0.25368	0.0505383	0.135159	0.373918	0.0327634
ENSMUSG00000024659	Anxa1	annexin A1 [Source:MGI Symbol;Acc:MGI:96819]	24	31	39	28	17	13	13	15	0.300867	0.419778	0.53134	0.380313	0.242418	0.1863	0.150028	0.213811	0.408074	0.198139	2.05953	0.00302483
ENSMUSG00000021950	Anxa8	annexin A8 [Source:MGI Symbol;Acc:MGI:1201374]	21	7	11	10	2	0	1	1	0.501096	0.180427	0.285252	0.258531	0.0542975	0	0.0219754	0.0271357	0.306326	0.0258522	11.8492	8.02e-07
ENSMUSG00000068264	Ap5s1	adaptor-related protein 5 complex, sigma 1 subunit [Source:MGI Symbol;Acc:MGI:1916846]	91	98	86	109	222	144	318	84	0.950947	1.10621	0.976694	1.23414	2.63896	1.72019	3.05919	0.99808	1.067	2.1041	0.507102	0.000752753
ENSMUSG00000002985	Apoe	apolipoprotein E [Source:MGI Symbol;Acc:MGI:88057]	7731	7810	11739	9693	15588	11321	10414	9475	64.5715	70.4613	106.556	87.7171	148.102	108.091	80.0731	89.9824	82.3266	106.562	0.772569	0.0302199
ENSMUSG00000090698	Apold1	apolipoprotein L domain containing 1 [Source:MGI Symbol;Acc:MGI:2685921]	94	51	89	83	106	198	93	146	1.43311	0.839874	1.47463	1.37104	1.83831	3.45075	1.30526	2.5309	1.27966	2.28131	0.560934	0.00409485
ENSMUSG00000118272	Arhgef4	Rho guanine nucleotide exchange factor (GEF) 4 [Source:MGI Symbol;Acc:MGI:2442507]	331	320	243	310	408	389	348	359	105.265	109.926	83.9857	106.817	147.598	141.418	101.883	129.815	101.498	130.179	0.779686	0.0226967
ENSMUSG00000026426	Arl8a	ADP-ribosylation factor-like 8A [Source:MGI Symbol;Acc:MGI:1915974]	1500	1297	1360	2839	1129	1121	1488	1268	29.5232	27.5744	29.0907	60.5422	25.2773	25.2219	26.9612	28.3769	36.6826	26.4593	1.38638	0.0444655
ENSMUSG00000060268	Armh1	armadillo-like helical domain containing 1 [Source:MGI Symbol;Acc:MGI:2686507]	7	3	21	3	0	2	0	1	0.13466	0.0623365	0.439033	0.0625353	0	0.0439843	0	0.0218756	0.174641	0.016465	10.6068	0.000745358
ENSMUSG00000008475	Arpc5	actin related protein 2/3 complex, subunit 5 [Source:MGI Symbol;Acc:MGI:1915021]	1910	3221	2044	2034	3493	3277	3691	3415	41.7984	76.1398	48.6128	48.2279	86.954	81.979	74.3592	84.9748	53.6947	82.0667	0.654281	0.00012754
ENSMUSG00000020604	Arsg	arylsulfatase G [Source:MGI Symbol;Acc:MGI:1921258]	415	452	547	398	402	285	288	317	4.08478	4.80566	5.85128	4.24449	4.50102	3.20675	2.60962	3.54774	4.74655	3.46628	1.36935	0.0245461
ENSMUSG00000038997	Asb17	ankyrin repeat and SOCS box-containing 17 [Source:MGI Symbol;Acc:MGI:1914022]	1	0	0	0	1	5	2	1	0.0163629	0	0	0	0.0185989	0.0934914	0.0301097	0.0185992	0.00409072	0.0401998	0.10176	0.0493994
ENSMUSG00000020884	Asgr1	asialoglycoprotein receptor 1 [Source:MGI Symbol;Acc:MGI:88081]	5	12	12	3	0	4	0	0	0.130607	0.338569	0.340626	0.0849122	0	0.119446	0	0	0.223679	0.0298616	7.49052	0.00139747
ENSMUSG00000037486	Asxl2	additional sex combs like 2, transcriptional regulator [Source:MGI Symbol;Acc:MGI:1922552]	256	312	176	334	303	377	407	292	0.419493	0.552247	0.31343	0.592997	0.564796	0.706196	0.613965	0.544053	0.469542	0.607252	0.773223	0.0495389
ENSMUSG00000030314	Atg7	autophagy related 7 [Source:MGI Symbol;Acc:MGI:1921494]	541	508	482	521	421	273	331	376	2.7026	2.74121	2.61682	2.81996	2.39238	1.559	1.52222	2.13572	2.72015	1.90233	1.4299	0.00465929
ENSMUSG00000055415	Atp10b	ATPase, class V, type 10B [Source:MGI Symbol;Acc:MGI:2442688]	61	38	30	69	32	16	47	23	0.309535	0.208285	0.165443	0.379357	0.18471	0.0928081	0.219555	0.132704	0.265655	0.157444	1.6873	0.0477202
ENSMUSG00000062683	Atp5g2	ATP synthase, H+ transporting, mitochondrial F0 complex, subunit C2 (subunit 9) [Source:MGI Symbol;Acc:MGI:1915192]	31	17	31	27	38	33	43	49	0.798601	0.473051	0.867903	0.753627	1.11355	0.971806	1.01975	1.43526	0.723295	1.13509	0.637213	0.0215681
ENSMUSG00000081700	Atp5k-ps2	ATP synthase, H+ transporting, mitochondrial F1F0 complex, subunit E, pseudogene 2 [Source:MGI Symbol;Acc:MGI:107356]	23	21	20	24	3	11	12	15	5.95598	5.87418	5.62854	6.7339	0.88374	3.25632	2.86066	4.41672	6.04815	2.85436	2.11892	0.010435
ENSMUSG00000071528	Atp5md	ATP synthase membrane subunit DAPIT [Source:MGI Symbol;Acc:MGI:1891435]	913	987	1139	773	1266	1069	1352	1183	14.2224	16.6079	19.2828	13.0468	22.4337	19.0362	19.3885	20.9537	15.79	20.453	0.772012	0.00482127
ENSMUSG00000038023	Atp6v0a2	ATPase, H+ transporting, lysosomal V0 subunit A2 [Source:MGI Symbol;Acc:MGI:104855]	1312	1141	1085	836	712	658	823	704	6.87501	6.45832	6.17891	4.74642	4.24408	3.94153	3.97011	4.19454	6.06466	4.08757	1.48369	0.000312812
ENSMUSG00000110419	AW046200	expressed sequence AW046200 [Source:MGI Symbol;Acc:MGI:2142745]	8	2	6	6	7	12	21	6	0.0958863	0.0258945	0.0781623	0.0779182	0.0954402	0.164426	0.231723	0.0817703	0.0694653	0.14334	0.48462	0.0385723
ENSMUSG00000033632	AW554918	expressed sequence AW554918 [Source:MGI Symbol;Acc:MGI:2147376]	69	61	103	61	75	80	163	200	0.30993	0.295965	0.502802	0.296871	0.383214	0.410775	0.674012	1.02146	0.351392	0.622365	0.564608	0.00762306
ENSMUSG00000093606	B130034C11Rik	RIKEN cDNA B130034C11 gene [Source:MGI Symbol;Acc:MGI:3041186]	15	22	18	23	23	22	42	35	0.230755	0.365578	0.300935	0.383358	0.402484	0.38689	0.594811	0.612212	0.320157	0.499099	0.641469	0.0368476
ENSMUSG00000086844	B230206H07Rik	RIKEN cDNA B230206H07 gene [Source:MGI Symbol;Acc:MGI:2444929]	43	34	43	34	22	23	18	18	0.376918	0.321925	0.409627	0.322906	0.219365	0.230469	0.14525	0.179406	0.357844	0.193622	1.84815	0.00385141
ENSMUSG00000106547	B230303O12Rik	RIKEN cDNA B230303O12 gene [Source:MGI Symbol;Acc:MGI:2442644]	5	4	4	3	15	9	10	5	0.0746021	0.0644629	0.0648488	0.0485013	0.254575	0.153494	0.137345	0.0848147	0.0631038	0.157557	0.400513	0.0159151
ENSMUSG00000097509	B230322F03Rik	RIKEN cDNA B230322F03 gene [Source:MGI Symbol;Acc:MGI:3704291]	5	7	8	13	12	21	12	16	0.173311	0.262073	0.301344	0.488196	0.47313	0.832048	0.38288	0.630563	0.306231	0.579655	0.528298	0.0317173
ENSMUSG00000039242	B3galnt2	UDP-GalNAc:betaGlcNAc beta 1,3-galactosaminyltransferase, polypeptide 2 [Source:MGI Symbol;Acc:MGI:2145517]	140	164	121	218	239	180	276	176	0.677113	0.856782	0.636004	1.14238	1.31491	0.995186	1.22887	0.967873	0.82807	1.12671	0.734946	0.0324056
ENSMUSG00000034780	B3galt1	UDP-Gal:betaGlcNAc beta 1,3-galactosyltransferase, polypeptide 1 [Source:MGI Symbol;Acc:MGI:1349403]	156	133	96	155	110	118	918	159	0.937925	0.863754	0.627276	1.00971	0.752316	0.811011	5.08102	1.08696	0.859667	1.93283	0.444772	0.0125009
ENSMUSG00000028413	B4galt1	UDP-Gal:betaGlcNAc beta 1,4- galactosyltransferase, polypeptide 1 [Source:MGI Symbol;Acc:MGI:95705]	100	118	172	129	234	234	184	104	1.2844	1.63711	2.40089	1.79521	3.41887	3.43572	2.17562	1.51883	1.7794	2.63726	0.674716	0.0285965
ENSMUSG00000040605	Bace2	beta-site APP-cleaving enzyme 2 [Source:MGI Symbol;Acc:MGI:1860440]	62	43	75	41	27	21	35	28	0.381192	0.285573	0.501138	0.273123	0.188838	0.147596	0.198099	0.195742	0.360256	0.182568	1.97327	0.00158014
ENSMUSG00000047507	Baiap3	BAI1-associated protein 3 [Source:MGI Symbol;Acc:MGI:2685783]	160	98	181	78	96	76	76	83	1.1204	0.741269	1.37746	0.591794	0.764701	0.608373	0.489931	0.660859	0.957731	0.630966	1.51788	0.043047
ENSMUSG00000025316	Banp	BTG3 associated nuclear protein [Source:MGI Symbol;Acc:MGI:1889023]	133	297	170	287	81	100	124	214	0.664777	1.60352	0.923454	1.55427	0.460546	0.571381	0.57057	1.21622	1.18651	0.704679	1.68375	0.0311253
ENSMUSG00000085218	BB218582	expressed sequence BB218582 [Source:MGI Symbol;Acc:MGI:2139448]	11	7	4	13	16	9	23	15	0.352713	0.242448	0.139371	0.451639	0.58359	0.329885	0.678917	0.546881	0.296543	0.534818	0.554474	0.0488568
ENSMUSG00000081137	BC022960	cDNA sequence BC022960 [Source:MGI Symbol;Acc:MGI:2670977]	42	29	44	35	35	4	8	23	1.25843	0.938574	1.43274	1.13623	1.1929	0.137018	0.220666	0.783574	1.19149	0.583541	2.04183	0.0435015
ENSMUSG00000036299	BC031181	cDNA sequence BC031181 [Source:MGI Symbol;Acc:MGI:3039614]	2077	1887	2076	1742	1328	1278	1835	1711	34.7007	34.054	37.694	31.5334	25.2386	24.408	28.2229	32.5031	34.4955	27.5931	1.25015	0.0397476
ENSMUSG00000090164	BC035044	cDNA sequence BC035044 [Source:MGI Symbol;Acc:MGI:2448540]	17	14	21	17	7	14	7	6	0.488625	0.434664	0.655997	0.529416	0.228865	0.460012	0.185215	0.196085	0.527176	0.267544	1.97043	0.0232568
ENSMUSG00000085274	BC046401	cDNA sequence BC046401 [Source:MGI Symbol;Acc:MGI:2683561]	1	5	4	5	1	0	2	0	0.0642345	0.346764	0.279072	0.347846	0.0730122	0	0.118199	0	0.259479	0.0478029	5.4281	0.0241682
ENSMUSG00000047515	BC049715	cDNA sequence BC049715 [Source:MGI Symbol;Acc:MGI:3605234]	90	69	100	50	50	66	44	16	0.500294	0.414309	0.604118	0.301143	0.316166	0.419398	0.225163	0.10113	0.454966	0.265464	1.71385	0.0438574
ENSMUSG00000115783	Bc1	brain cytoplasmic RNA 1 [Source:MGI Symbol;Acc:MGI:104905]	54	58	63	40	384	180	189	99	17.4798	20.2799	22.163	14.0291	141.397	66.6064	56.3209	36.4376	18.4879	75.1904	0.245881	8.82e-09
ENSMUSG00000027792	Bche	butyrylcholinesterase [Source:MGI Symbol;Acc:MGI:894278]	75	110	75	87	50	58	71	57	0.531006	0.841244	0.577082	0.667384	0.402688	0.469425	0.462764	0.458862	0.654179	0.448435	1.4588	0.034606
ENSMUSG00000099757	BE692007	expressed sequence BE692007 [Source:MGI Symbol;Acc:MGI:3035348]	3	4	1	4	11	23	1	4	0.0288942	0.0416092	0.0104646	0.0417348	0.120507	0.253201	0.00886876	0.0437945	0.0306757	0.106593	0.287784	0.0345851
ENSMUSG00000027420	Bfsp1	beaded filament structural protein 1, in lens-CP94 [Source:MGI Symbol;Acc:MGI:101770]	12	12	16	20	7	6	10	2	0.227688	0.245953	0.329944	0.41118	0.151086	0.130136	0.174677	0.0431558	0.303691	0.124764	2.43414	0.00813397
ENSMUSG00000032556	Bfsp2	beaded filament structural protein 2, phakinin [Source:MGI Symbol;Acc:MGI:1333828]	86	62	93	79	22	46	43	71	2.7543	2.14487	3.237	2.74136	0.801495	1.68413	1.26778	2.5855	2.71938	1.58473	1.71599	0.0206177
ENSMUSG00000040093	Bmf	BCL2 modifying factor [Source:MGI Symbol;Acc:MGI:2176433]	70	60	49	58	118	97	79	65	0.372843	0.345201	0.283638	0.334714	0.714947	0.590608	0.387361	0.393653	0.334099	0.521642	0.640476	0.0106529
ENSMUSG00000039004	Bmp6	bone morphogenetic protein 6 [Source:MGI Symbol;Acc:MGI:88182]	112	103	314	133	138	84	68	80	1.3487	1.33977	4.10933	1.73529	1.89035	1.15632	0.75383	1.09537	2.13327	1.22397	1.74292	0.0368773
ENSMUSG00000031377	Bmx	BMX non-receptor tyrosine kinase [Source:MGI Symbol;Acc:MGI:1101778]	23	31	16	10	44	27	35	29	0.352524	0.513246	0.266522	0.166063	0.767158	0.47307	0.49385	0.505406	0.324589	0.559871	0.579756	0.0250841
ENSMUSG00000000202	Btbd17	BTB (POZ) domain containing 17 [Source:MGI Symbol;Acc:MGI:1919264]	250	176	294	216	159	153	164	164	1.41915	1.07918	1.81375	1.3285	1.02671	0.992841	0.85703	1.05853	1.41015	0.983778	1.4334	0.0163143
ENSMUSG00000111375	Btbd8	BTB (POZ) domain containing 8 [Source:MGI Symbol;Acc:MGI:3646208]	1295	1284	1192	1161	1577	1862	2442	1221	7.05655	7.55757	7.05897	6.8545	9.77504	11.5985	12.2499	7.56503	7.1319	10.2971	0.692611	0.000317394
ENSMUSG00000051223	Bzw1	basic leucine zipper and W2 domains 1 [Source:MGI Symbol;Acc:MGI:1914132]	1519	1574	2950	3403	2974	3183	4255	3691	16.9309	18.9505	35.7344	41.0965	37.7075	40.5563	43.6602	46.7777	28.1781	42.1754	0.668116	0.00626838
ENSMUSG00000110027	C030029H02Rik	RIKEN cDNA C030029H02 gene [Source:MGI Symbol;Acc:MGI:1924633]	69	76	56	56	21	31	43	41	0.793135	0.943643	0.69957	0.697441	0.274593	0.407343	0.455018	0.535862	0.783447	0.418204	1.87336	0.00168034
ENSMUSG00000036907	C1ql2	complement component 1, q subcomponent-like 2 [Source:MGI Symbol;Acc:MGI:3032521]	1101	1322	2520	1453	1095	579	1249	1387	29.9371	38.8283	74.4674	42.8065	33.8689	17.997	31.2643	42.8817	46.5098	31.503	1.47636	0.0451432
ENSMUSG00000087461	C230014O12Rik	RIKEN cDNA C230014O12 gene [Source:MGI Symbol;Acc:MGI:3045377]	4	2	1	8	5	10	10	11	0.0668258	0.0360933	0.0181547	0.144809	0.0950321	0.190985	0.153801	0.208953	0.0664707	0.162193	0.409825	0.0291596
ENSMUSG00000087365	C430049B03Rik	RIKEN cDNA C430049B03 gene [Source:MGI Symbol;Acc:MGI:1924903]	2	4	5	2	0	0	0	0	0.0404008	0.0872835	0.10978	0.0437735	0	0	0	0	0.0703095	0	Inf	0.000889515
ENSMUSG00000074361	C5ar2	complement component 5a receptor 2 [Source:MGI Symbol;Acc:MGI:2442013]	0	0	1	1	1	1	0	19	0	0	0.00867746	0.00865622	0.00908095	0.00912948	0	0.172514	0.00433342	0.047681	0.0908835	0.0257007
ENSMUSG00000103570	C630004M23Rik	RIKEN cDNA C630004M23 gene [Source:MGI Symbol;Acc:MGI:3642399]	2	6	11	5	2	0	4	2	0.0646606	0.209543	0.386498	0.175164	0.0735696	0	0.119043	0.0735342	0.208966	0.0665366	3.14062	0.0416825
ENSMUSG00000003657	Calb2	calbindin 2 [Source:MGI Symbol;Acc:MGI:101914]	721	420	836	489	314	315	438	552	20.5715	12.9441	25.9226	15.1168	10.1912	10.274	11.5045	17.9078	18.6388	12.4694	1.49476	0.0182542
ENSMUSG00000030319	Cand2	cullin-associated and neddylation-dissociated 2 (putative) [Source:MGI Symbol;Acc:MGI:1914338]	114	96	97	106	56	70	64	59	1.13254	1.03018	1.04728	1.14097	0.63285	0.794957	0.585316	0.66646	1.08774	0.669895	1.62375	0.00198004
ENSMUSG00000056737	Capg	capping protein (actin filament), gelsolin-like [Source:MGI Symbol;Acc:MGI:1098259]	65	41	52	63	143	102	65	39	0.859214	0.585419	0.747017	0.902299	2.15025	1.5413	0.790982	0.586179	0.773487	1.26718	0.610401	0.0421239
ENSMUSG00000001794	Capns1	calpain, small subunit 1 [Source:MGI Symbol;Acc:MGI:88266]	3015	2516	2239	2496	1712	1597	1948	1686	30.4138	27.415	24.546	27.2803	19.645	18.4157	18.0899	19.3381	27.4138	18.8722	1.4526	8.43e-05
ENSMUSG00000032373	Car12	carbonic anhydrase 12 [Source:MGI Symbol;Acc:MGI:1923709]	514	395	781	519	380	290	402	429	2.42915	2.01642	4.01129	2.65754	2.04286	1.56671	1.74896	2.30527	2.7786	1.91595	1.45025	0.0145772
ENSMUSG00000027555	Car13	carbonic anhydrase 13 [Source:MGI Symbol;Acc:MGI:1931322]	7	15	14	15	3	10	8	4	0.165587	0.383265	0.359909	0.384436	0.0807244	0.270403	0.17421	0.107572	0.323299	0.158227	2.04326	0.0464505
ENSMUSG00000027562	Car2	carbonic anhydrase 2 [Source:MGI Symbol;Acc:MGI:88269]	3725	3667	3887	3419	2449	2528	3094	3064	66.2432	70.4402	75.123	65.8773	49.5415	51.3916	50.6524	61.9551	69.4209	53.3851	1.30038	0.00770826
ENSMUSG00000028463	Car9	carbonic anhydrase 9 [Source:MGI Symbol;Acc:MGI:2447188]	10	6	8	11	0	4	5	0	0.145711	0.0944402	0.126691	0.173671	0	0.0666364	0.0670717	0	0.135128	0.033427	4.04249	0.00399865
ENSMUSG00000013483	Card14	caspase recruitment domain family, member 14 [Source:MGI Symbol;Acc:MGI:2386258]	2	4	6	5	20	7	18	8	0.0160649	0.0347071	0.0523814	0.0435193	0.182747	0.0642748	0.133107	0.0730689	0.0366682	0.113299	0.32364	0.00258856
ENSMUSG00000026928	Card9	caspase recruitment domain family, member 9 [Source:MGI Symbol;Acc:MGI:2685628]	31	22	27	34	43	57	44	28	0.60403	0.463031	0.571733	0.717775	0.953077	1.26961	0.789241	0.620328	0.589142	0.908064	0.648789	0.0324203
ENSMUSG00000043541	Casc1	cancer susceptibility candidate 1 [Source:MGI Symbol;Acc:MGI:2444480]	43	19	18	17	13	11	8	5	0.149801	0.0714986	0.068149	0.0641676	0.0515172	0.043807	0.0256572	0.0198046	0.0884042	0.0351965	2.51173	0.00369518
ENSMUSG00000051980	Casr	calcium-sensing receptor [Source:MGI Symbol;Acc:MGI:1351351]	0	1	0	1	2	2	6	2	0	0.00887472	0	0.00890601	0.0186953	0.0187859	0.0453835	0.0186863	0.00444518	0.0253877	0.175092	0.0277156
ENSMUSG00000020424	Castor1	cytosolic arginine sensor for mTORC1 subunit 1 [Source:MGI Symbol;Acc:MGI:1919212]	63	46	79	51	89	91	87	66	2.17665	1.71672	2.96633	1.90917	3.49788	3.59408	2.76713	2.59278	2.19222	3.11297	0.704221	0.0299083
ENSMUSG00000006362	Cbfa2t3	CBFA2/RUNX1 translocation partner 3 [Source:MGI Symbol;Acc:MGI:1338013]	592	428	589	619	228	358	463	398	2.7474	2.14554	2.97069	3.11251	1.20364	1.89925	1.97808	2.10017	2.74404	1.79529	1.52847	0.00279998
ENSMUSG00000018666	Cbx1	chromobox 1 [Source:MGI Symbol;Acc:MGI:105369]	558	493	578	551	383	424	498	227	5.04237	4.81218	5.67638	5.39477	3.93699	4.37992	4.1428	2.33238	5.23142	3.69802	1.41465	0.014762
ENSMUSG00000050625	Ccdc121	coiled-coil domain containing 121 [Source:MGI Symbol;Acc:MGI:2685601]	18	12	25	17	3	6	4	1	0.538145	0.387521	0.812271	0.550663	0.102026	0.205041	0.110077	0.0339979	0.57215	0.112785	5.07291	3.89e-06
ENSMUSG00000064280	Ccdc146	coiled-coil domain containing 146 [Source:MGI Symbol;Acc:MGI:1922422]	14	4	26	15	3	4	0	1	0.151305	0.0466946	0.305369	0.175639	0.036881	0.0494211	0	0.0122898	0.169752	0.024648	6.88705	0.000136762
ENSMUSG00000070306	Ccdc153	coiled-coil domain containing 153 [Source:MGI Symbol;Acc:MGI:2448587]	68	34	70	64	21	0	3	13	0.937619	0.506395	1.04896	0.956137	0.329386	0	0.0380823	0.20381	0.862278	0.14282	6.03753	1.7e-05
ENSMUSG00000075225	Ccdc162	coiled-coil domain containing 162 [Source:MGI Symbol;Acc:MGI:1923223]	23	13	29	46	12	15	9	15	0.102169	0.062379	0.140006	0.221402	0.0606389	0.0761734	0.0368069	0.0757646	0.131489	0.062346	2.10902	0.0163315
ENSMUSG00000035539	Ccdc180	coiled-coil domain containing 180 [Source:MGI Symbol;Acc:MGI:2685871]	4	1	11	17	4	0	2	1	0.0367553	0.00992595	0.10985	0.169256	0.0418092	0	0.016917	0.0104499	0.0814467	0.017294	4.70953	0.0166084
ENSMUSG00000048038	Ccdc187	coiled-coil domain containing 187 [Source:MGI Symbol;Acc:MGI:3045295]	42	21	52	42	21	9	19	13	0.225296	0.121679	0.30314	0.244104	0.128141	0.0551868	0.0938266	0.0792884	0.223554	0.0891108	2.50872	0.000533752
ENSMUSG00000037716	Ccdc33	coiled-coil domain containing 33 [Source:MGI Symbol;Acc:MGI:1922464]	13	6	27	18	10	3	4	4	0.0979306	0.0488226	0.221043	0.146918	0.0856902	0.0258367	0.0277365	0.0342578	0.128679	0.0433803	2.96629	0.00746443
ENSMUSG00000038903	Ccdc68	coiled-coil domain containing 68 [Source:MGI Symbol;Acc:MGI:3612676]	8	6	3	7	3	1	1	1	0.152644	0.123667	0.0622037	0.144724	0.0651177	0.0218147	0.0175726	0.021699	0.12081	0.031551	3.82903	0.00937495
ENSMUSG00000071202	Ccdc78	coiled-coil domain containing 78 [Source:MGI Symbol;Acc:MGI:2685784]	10	11	13	10	8	3	3	4	0.240086	0.28528	0.339222	0.260129	0.218505	0.0823467	0.066312	0.109186	0.281179	0.119088	2.36111	0.0199603
ENSMUSG00000039391	Ccdc81	coiled-coil domain containing 81 [Source:MGI Symbol;Acc:MGI:1918134]	22	3	25	16	14	1	3	1	0.335786	0.0494598	0.414685	0.264599	0.243078	0.0174493	0.0421546	0.0173568	0.266132	0.0800096	3.32625	0.0292914
ENSMUSG00000044362	Ccdc89	coiled-coil domain containing 89 [Source:MGI Symbol;Acc:MGI:1917304]	15	14	11	15	8	7	8	5	0.389737	0.392922	0.310602	0.422273	0.236462	0.207903	0.191356	0.147706	0.378883	0.195857	1.93449	0.0364898
ENSMUSG00000035385	Ccl2	chemokine (C-C motif) ligand 2 [Source:MGI Symbol;Acc:MGI:98259]	0	5	12	40	70	142	20	2	0	0.153855	0.371495	1.23462	2.26836	4.6242	0.524487	0.0647902	0.439992	1.87046	0.235232	0.0322326
ENSMUSG00000019997	Ccn2	cellular communication network factor 2 [Source:MGI Symbol;Acc:MGI:95537]	459	326	284	351	472	398	605	347	5.24836	4.02645	3.52916	4.34849	6.13928	5.20228	6.3684	4.51142	4.28812	5.55534	0.771891	0.0220235
ENSMUSG00000000184	Ccnd2	cyclin D2 [Source:MGI Symbol;Acc:MGI:88314]	1451	1124	1324	1326	946	1000	1272	945	6.38723	5.34449	6.33397	6.32427	4.73697	5.03205	5.15462	4.72988	6.09749	4.91338	1.241	0.0376345
ENSMUSG00000020698	Cct6b	chaperonin containing Tcp1, subunit 6b (zeta) [Source:MGI Symbol;Acc:MGI:1329013]	1	0	2	1	3	1	15	5	0.0260693	0	0.0566301	0.0282457	0.0889245	0.02979	0.359815	0.148131	0.0277363	0.156665	0.177042	0.0105229
ENSMUSG00000086564	Cd101	CD101 antigen [Source:MGI Symbol;Acc:MGI:2685862]	2	7	0	7	17	15	26	8	0.0294501	0.111344	0	0.111688	0.284758	0.252509	0.352461	0.13395	0.0631205	0.255919	0.246642	0.000443087
ENSMUSG00000047139	Cd24a	CD24a antigen [Source:MGI Symbol;Acc:MGI:88323]	165	83	171	130	79	77	100	91	2.86402	1.5562	3.22575	2.44487	1.55985	1.52786	1.59792	1.79599	2.52271	1.62041	1.55684	0.0149593
ENSMUSG00000044811	Cd300c2	CD300C molecule 2 [Source:MGI Symbol;Acc:MGI:2153249]	51	53	62	58	96	95	85	72	1.42523	1.59985	1.88298	1.75613	3.05173	3.03482	2.18671	2.28778	1.66605	2.64026	0.631016	0.00260016
ENSMUSG00000016493	Cd46	CD46 antigen, complement regulatory protein [Source:MGI Symbol;Acc:MGI:1203290]	51	45	63	70	74	54	88	115	0.331996	0.316421	0.4457	0.493718	0.547969	0.40184	0.527357	0.851194	0.396959	0.58209	0.681954	0.0351782
ENSMUSG00000049521	Cdc42ep1	CDC42 effector protein (Rho GTPase binding) 1 [Source:MGI Symbol;Acc:MGI:1929763]	436	361	413	339	243	226	296	210	9.26189	8.28351	9.53466	7.8025	5.87197	5.4881	5.78854	5.0723	8.72064	5.55523	1.56981	0.000128406
ENSMUSG00000045664	Cdc42ep2	CDC42 effector protein (Rho GTPase binding) 2 [Source:MGI Symbol;Acc:MGI:1929744]	165	195	163	170	91	126	131	97	2.6306	3.35815	2.82423	2.93658	1.65035	2.29637	1.92267	1.7584	2.93739	1.90695	1.54036	0.00373689
ENSMUSG00000048922	Cdca2	cell division cycle associated 2 [Source:MGI Symbol;Acc:MGI:1919787]	4	3	3	3	0	0	1	1	0.0252341	0.0204438	0.0205662	0.020509	0	0	0.00580996	0.00717428	0.0216883	0.00324606	6.68141	0.0134252
ENSMUSG00000026312	Cdh7	cadherin 7, type 2 [Source:MGI Symbol;Acc:MGI:2442792]	88	97	40	75	87	80	187	98	0.242101	0.288256	0.119596	0.223559	0.272268	0.251593	0.473607	0.306558	0.218378	0.326007	0.669857	0.0410153
ENSMUSG00000032595	Cdhr4	cadherin-related family member 4 [Source:MGI Symbol;Acc:MGI:1916648]	27	24	42	45	23	9	11	13	0.23076	0.221563	0.390104	0.416698	0.223602	0.0879277	0.086548	0.126328	0.314781	0.131102	2.40105	0.00182321
ENSMUSG00000026437	Cdk18	cyclin-dependent kinase 18 [Source:MGI Symbol;Acc:MGI:97518]	519	394	504	403	286	274	447	347	4.66514	3.8255	4.92347	3.92485	2.92434	2.81545	3.69887	3.5465	4.33474	3.24629	1.33529	0.0230589
ENSMUSG00000038491	Cdk19os	cyclin-dependent kinase 19, opposite strand [Source:MGI Symbol;Acc:MGI:1914837]	2	2	0	4	0	0	0	0	0.0655965	0.0708586	0	0.142145	0	0	0	0	0.0696501	0	Inf	0.0216352
ENSMUSG00000023067	Cdkn1a	cyclin-dependent kinase inhibitor 1A (P21) [Source:MGI Symbol;Acc:MGI:104556]	212	177	242	197	741	494	445	216	1.74575	1.57439	2.16573	1.75765	6.9411	4.65021	3.37341	2.02242	1.81088	4.24679	0.426412	6.94e-06
ENSMUSG00000096472	Cdkn2d	cyclin dependent kinase inhibitor 2D [Source:MGI Symbol;Acc:MGI:105387]	963	937	731	731	622	485	763	691	15.5031	16.294	12.7895	12.7506	11.3906	8.92554	11.3079	12.6487	14.3343	11.0682	1.29509	0.031117
ENSMUSG00000071637	Cebpd	CCAAT/enhancer binding protein (C/EBP), delta [Source:MGI Symbol;Acc:MGI:103573]	381	373	474	408	844	501	504	490	4.96155	5.24681	6.70832	5.7567	12.5026	7.45813	6.04208	7.25541	5.66834	8.31455	0.681738	0.00385001
ENSMUSG00000031629	Cenpu	centromere protein U [Source:MGI Symbol;Acc:MGI:1919126]	17	22	21	16	10	14	12	7	0.182163	0.254644	0.244561	0.185767	0.121891	0.171496	0.118372	0.0852875	0.216784	0.124262	1.74457	0.0451004
ENSMUSG00000039781	Cep131	centrosomal protein 131 [Source:MGI Symbol;Acc:MGI:107440]	388	346	486	391	282	301	357	296	4.04837	3.89959	5.51097	4.42025	3.34705	3.59017	3.4291	3.51166	4.46979	3.4695	1.28831	0.0432164
ENSMUSG00000046111	Cep295	centrosomal protein 295 [Source:MGI Symbol;Acc:MGI:2442521]	201	310	167	200	322	255	334	254	0.447688	0.74582	0.404239	0.482647	0.815829	0.64926	0.68484	0.643258	0.520099	0.698297	0.74481	0.0288514
ENSMUSG00000011154	Cfap161	cilia and flagella associated protein 161 [Source:MGI Symbol;Acc:MGI:1922806]	20	16	15	17	7	6	5	6	0.237322	0.205077	0.193438	0.218559	0.0944822	0.0813809	0.0546174	0.0809496	0.213599	0.0778575	2.74346	0.000649718
ENSMUSG00000044948	Cfap43	cilia and flagella associated protein 43 [Source:MGI Symbol;Acc:MGI:1289258]	45	34	80	51	26	13	20	20	0.301412	0.245993	0.582349	0.370123	0.198099	0.0995408	0.123321	0.152317	0.374969	0.143319	2.61632	0.000117284
ENSMUSG00000039543	Cfap70	cilia and flagella associated protein 70 [Source:MGI Symbol;Acc:MGI:1923920]	13	10	15	31	12	9	2	6	0.138538	0.115112	0.173726	0.357943	0.145472	0.109638	0.0196188	0.0727007	0.19633	0.0868574	2.26037	0.0384384
ENSMUSG00000079502	Cfap77	cilia and flagella associated protein 77 [Source:MGI Symbol;Acc:MGI:2685669]	10	2	16	7	2	0	0	0	0.122919	0.026556	0.213747	0.0932333	0.0279711	0	0	0	0.114114	0.00699277	16.3189	5.36e-05
ENSMUSG00000109572	Cfap99	cilia and flagella associated protein 99 [Source:MGI Symbol;Acc:MGI:5434801]	6	9	4	10	0	3	7	1	0.153687	0.249023	0.11134	0.277528	0	0.0878546	0.165062	0.0291297	0.197894	0.0705116	2.80655	0.0469989
ENSMUSG00000050370	Ch25h	cholesterol 25-hydroxylase [Source:MGI Symbol;Acc:MGI:1333869]	10	8	15	12	103	36	23	17	0.392066	0.338813	0.639167	0.509755	4.59386	1.61355	0.830168	0.757891	0.46995	1.94887	0.24114	0.000156339
ENSMUSG00000039084	Chad	chondroadherin [Source:MGI Symbol;Acc:MGI:1096866]	2	4	7	2	2	0	0	0	0.0647375	0.139861	0.246259	0.0701419	0.0736572	0	0	0	0.13025	0.0184143	7.07331	0.0124012
ENSMUSG00000094320	Chchd2-ps	coiled-coil-helix-coiled-coil-helix domain containing 2, pseudogene [Source:MGI Symbol;Acc:MGI:3649942]	34	22	24	26	11	14	18	20	4.00207	2.79723	3.07019	3.31593	1.47294	1.88386	1.9505	2.67675	3.29635	1.99601	1.65147	0.0386584
ENSMUSG00000025371	Chmp6	charged multivesicular body protein 6 [Source:MGI Symbol;Acc:MGI:3583942]	306	449	363	301	409	423	531	470	4.797	7.60307	6.1844	5.11253	7.29352	7.58034	7.66315	8.37759	5.92425	7.72865	0.766531	0.0127607
ENSMUSG00000031879	Ciao2b	cytosolic iron-sulfur assembly component 2B [Source:MGI Symbol;Acc:MGI:1915773]	262	240	303	233	195	145	236	183	6.89643	6.82383	8.66779	6.64508	5.83878	4.36304	5.71872	5.47705	7.25828	5.3494	1.35684	0.0301072
ENSMUSG00000037493	Cib2	calcium and integrin binding family member 2 [Source:MGI Symbol;Acc:MGI:1929293]	547	473	573	495	370	409	369	446	20.7584	19.3893	23.6322	20.3532	15.9725	17.7431	12.8913	19.2449	21.0333	16.4629	1.27761	0.0455079
ENSMUSG00000070803	Cited4	Cbp/p300-interacting transactivator, with Glu/Asp-rich carboxy-terminal domain, 4 [Source:MGI Symbol;Acc:MGI:1861694]	53	53	59	42	74	57	100	65	2.30765	2.49265	2.79179	1.98136	3.66512	2.83706	4.00823	3.21793	2.39336	3.43208	0.697349	0.019461
ENSMUSG00000025784	Clec3b	C-type lectin domain family 3, member b [Source:MGI Symbol;Acc:MGI:104540]	20	23	32	14	15	11	8	10	1.09642	1.36196	1.90649	0.83158	0.93541	0.689343	0.403738	0.623348	1.29911	0.66296	1.95956	0.0230934
ENSMUSG00000030142	Clec4e	C-type lectin domain family 4, member e [Source:MGI Symbol;Acc:MGI:1861232]	0	0	0	0	2	3	0	3	0	0	0	0	0.00937739	0.0141342	0	0.0140593	0	0.00939274	0	0.0187821
ENSMUSG00000024059	Clip4	CAP-GLY domain containing linker protein family, member 4 [Source:MGI Symbol;Acc:MGI:1919100]	691	630	386	611	718	981	624	627	2.48662	2.44887	1.5096	2.38228	2.93914	4.03552	2.06719	2.5655	2.20684	2.90184	0.760499	0.0409169
ENSMUSG00000029238	Clock	circadian locomotor output cycles kaput [Source:MGI Symbol;Acc:MGI:99698]	1145	1086	930	1170	1003	1398	1774	1284	2.79965	2.86829	2.47129	3.0996	2.78974	3.90756	3.99316	3.56974	2.80971	3.56505	0.788126	0.011431
ENSMUSG00000031789	Cngb1	cyclic nucleotide gated channel beta 1 [Source:MGI Symbol;Acc:MGI:2664102]	5	4	5	7	0	2	2	3	0.0209964	0.0181428	0.022819	0.031848	0	0.00960108	0.00773028	0.0143253	0.0234516	0.00791416	2.96324	0.0311862
ENSMUSG00000026514	Cnih3	cornichon family AMPA receptor auxiliary protein 3 [Source:MGI Symbol;Acc:MGI:1920228]	1004	983	889	974	1403	1448	1361	1618	11.0368	11.6724	10.6208	11.6009	17.5442	18.1961	13.7731	20.2238	11.2327	17.4343	0.644288	2.24e-06
ENSMUSG00000006782	Cnp	2',3'-cyclic nucleotide 3' phosphodiesterase [Source:MGI Symbol;Acc:MGI:88437]	5536	5005	5725	4821	4056	3803	3816	3958	54.3522	53.0787	61.0858	51.2837	45.2985	42.6823	34.4901	44.1845	54.9501	41.6638	1.31889	0.00521475
ENSMUSG00000053024	Cntn2	contactin 2 [Source:MGI Symbol;Acc:MGI:104518]	1864	1808	1829	2184	1496	1090	1871	1305	5.12968	5.37448	5.47017	6.51205	4.68317	3.42902	4.74004	4.08345	5.62159	4.23392	1.32775	0.0115293
ENSMUSG00000024330	Col11a2	collagen, type XI, alpha 2 [Source:MGI Symbol;Acc:MGI:88447]	284	269	313	265	125	154	186	217	1.94857	1.99363	2.33392	1.97	0.975602	1.20786	1.17483	1.6929	2.06153	1.2628	1.63251	0.000804928
ENSMUSG00000028339	Col15a1	collagen, type XV, alpha 1 [Source:MGI Symbol;Acc:MGI:88449]	61	33	76	41	28	42	18	30	0.354676	0.207257	0.480237	0.258289	0.185193	0.279158	0.0963468	0.198334	0.325115	0.189758	1.71331	0.0391265
ENSMUSG00000001506	Col1a1	collagen, type I, alpha 1 [Source:MGI Symbol;Acc:MGI:88467]	48	50	81	54	38	41	28	39	0.376453	0.423578	0.690393	0.458863	0.339012	0.367579	0.202157	0.347785	0.487322	0.314133	1.55132	0.0440238
ENSMUSG00000001119	Col6a1	collagen, type VI, alpha 1 [Source:MGI Symbol;Acc:MGI:88459]	320	211	203	152	152	133	130	134	3.84154	2.7361	2.64846	1.97706	2.07569	1.82518	1.43669	1.82908	2.80079	1.79166	1.56324	0.00814918
ENSMUSG00000091345	Col6a5	collagen, type VI, alpha 5 [Source:MGI Symbol;Acc:MGI:3648134]	8	8	14	18	8	4	2	2	0.0413101	0.0446239	0.078571	0.100713	0.046996	0.0236148	0.00950668	0.0117448	0.0663044	0.0229656	2.88712	0.0103544
ENSMUSG00000028626	Col9a2	collagen, type IX, alpha 2 [Source:MGI Symbol;Acc:MGI:88466]	77	65	84	64	45	40	54	41	1.14787	1.04666	1.36087	1.03372	0.763081	0.68164	0.741062	0.694946	1.14728	0.720182	1.59304	0.00681547
ENSMUSG00000027206	Cops2	COP9 signalosome subunit 2 [Source:MGI Symbol;Acc:MGI:1330276]	1717	1352	1150	1429	1595	1732	1698	1997	16.8362	14.32	12.255	15.1819	17.7909	19.4142	15.3276	22.2651	14.6483	18.6995	0.783353	0.0108256
ENSMUSG00000079941	Cox5b-ps	cytochrome c oxidase subunit 5B, pseudogene [Source:MGI Symbol;Acc:MGI:3649411]	1302	1045	1287	1069	774	719	965	989	181.551	157.398	195.034	161.505	122.77	114.608	123.874	156.804	173.872	129.514	1.34249	0.00796214
ENSMUSG00000051811	Cox6b2	cytochrome c oxidase subunit 6B2 [Source:MGI Symbol;Acc:MGI:3044182]	36	34	37	35	24	19	21	15	0.697441	0.711514	0.77904	0.734685	0.528922	0.420784	0.374538	0.330428	0.73067	0.413668	1.76632	0.00903462
ENSMUSG00000017778	Cox7c	cytochrome c oxidase subunit 7C [Source:MGI Symbol;Acc:MGI:103226]	100	140	106	101	187	127	150	138	3.08811	4.66999	3.55747	3.37939	6.569	4.48329	4.26431	4.84558	3.67374	5.04054	0.728838	0.0282897
ENSMUSG00000003617	Cp	ceruloplasmin [Source:MGI Symbol;Acc:MGI:88476]	192	153	174	316	397	729	247	181	0.714424	0.61495	0.703634	1.27398	1.68039	3.10085	0.846088	0.765782	0.826747	1.59828	0.517274	0.00739037
ENSMUSG00000025196	Cpn1	carboxypeptidase N, polypeptide 1 [Source:MGI Symbol;Acc:MGI:2135874]	8	5	14	7	6	0	1	0	0.111548	0.07531	0.212162	0.10576	0.095172	0	0.0128415	0	0.126195	0.0270034	4.6733	0.00515947
ENSMUSG00000034361	Cpne2	copine II [Source:MGI Symbol;Acc:MGI:2387578]	989	526	674	660	360	469	411	490	11.3372	6.51311	8.39675	8.19734	4.69435	6.14584	4.33724	6.38672	8.61109	5.39104	1.5973	0.000716174
ENSMUSG00000026616	Cr2	complement receptor 2 [Source:MGI Symbol;Acc:MGI:88489]	4	4	4	6	6	13	15	6	0.0179515	0.0193915	0.0195076	0.0291751	0.0306322	0.0666973	0.0619737	0.0306175	0.0215064	0.0474802	0.452956	0.0318481
ENSMUSG00000006356	Crip2	cysteine rich protein 2 [Source:MGI Symbol;Acc:MGI:1915587]	428	545	561	820	331	296	351	489	7.60136	10.4553	10.8281	15.7791	6.68713	6.00951	5.73876	9.87483	11.166	7.07756	1.57766	0.00494427
ENSMUSG00000031825	Crispld2	cysteine-rich secretory protein LCCL domain containing 2 [Source:MGI Symbol;Acc:MGI:1926142]	21	43	14	47	30	102	112	60	0.173398	0.383525	0.125635	0.420481	0.281788	0.962785	0.851362	0.563323	0.27576	0.664814	0.414792	0.00241775
ENSMUSG00000017776	Crk	v-crk avian sarcoma virus CT10 oncogene homolog [Source:MGI Symbol;Acc:MGI:88508]	954	934	2456	955	726	697	1128	983	5.67803	6.00469	15.8862	6.15848	4.91531	4.74222	6.18048	6.65236	8.43185	5.62259	1.49964	0.0466292
ENSMUSG00000084989	Crocc2	ciliary rootlet coiled-coil, rootletin family member 2 [Source:MGI Symbol;Acc:MGI:3045962]	6	4	3	7	1	0	0	1	0.0457483	0.0329455	0.0248571	0.0578329	0.00867096	0	0	0.0086711	0.0403459	0.00433551	9.30591	0.000706037
ENSMUSG00000038135	Crygn	crystallin, gamma N [Source:MGI Symbol;Acc:MGI:2449167]	7	13	14	16	4	4	2	4	0.474668	0.952173	1.03171	1.17552	0.308512	0.310084	0.124832	0.308363	0.908518	0.262948	3.45513	0.00119528
ENSMUSG00000068129	Cst7	cystatin F (leukocystatin) [Source:MGI Symbol;Acc:MGI:1298217]	14	19	10	18	53	68	15	12	0.772178	1.13194	0.599388	1.07566	3.32519	4.28733	0.761597	0.752519	0.894793	2.28166	0.392168	0.0111262
ENSMUSG00000028189	Ctbs	chitobiase [Source:MGI Symbol;Acc:MGI:1921495]	143	132	112	188	149	177	248	175	0.912529	0.90987	0.776734	1.29984	1.08159	1.29117	1.45689	1.26976	0.974743	1.27485	0.764592	0.0475304
ENSMUSG00000044258	Ctla2a	cytotoxic T lymphocyte-associated protein 2 alpha [Source:MGI Symbol;Acc:MGI:88554]	66	62	109	96	177	167	164	118	0.769227	0.780538	1.38064	1.21228	2.34664	2.22497	1.75961	1.56374	1.03567	1.97374	0.524724	0.000101225
ENSMUSG00000074874	Ctla2b	cytotoxic T lymphocyte-associated protein 2 beta [Source:MGI Symbol;Acc:MGI:88555]	11	5	3	10	28	22	16	13	0.152525	0.0748875	0.0452016	0.150227	0.441639	0.348714	0.204237	0.204953	0.10571	0.299886	0.352502	0.00114512
ENSMUSG00000029380	Cxcl1	chemokine (C-X-C motif) ligand 1 [Source:MGI Symbol;Acc:MGI:108068]	6	6	3	10	44	32	4	12	0.115537	0.124805	0.0627764	0.208637	0.963838	0.70443	0.0709029	0.262742	0.127939	0.500478	0.255634	0.00275045
ENSMUSG00000046668	Cxxc5	CXXC finger 5 [Source:MGI Symbol;Acc:MGI:1914643]	1141	1207	1296	1094	830	779	1213	923	9.74702	11.1375	12.0319	10.1257	8.06546	7.60717	9.53918	8.96522	10.7605	8.54426	1.25939	0.0357236
ENSMUSG00000024087	Cyp1b1	cytochrome P450, family 1, subfamily b, polypeptide 1 [Source:MGI Symbol;Acc:MGI:88590]	41	33	65	13	175	124	81	60	0.260868	0.226802	0.449464	0.0896196	1.2666	0.901902	0.474449	0.434075	0.256689	0.769258	0.333683	0.000163717
ENSMUSG00000025479	Cyp2e1	cytochrome P450, family 2, subfamily e, polypeptide 1 [Source:MGI Symbol;Acc:MGI:88607]	3	6	1	10	0	2	1	1	0.0478071	0.103267	0.0173142	0.172632	0	0.0364323	0.0146739	0.0181196	0.085255	0.0173065	4.9262	0.0173706
ENSMUSG00000031889	D230025D16Rik	RIKEN cDNA D230025D16 gene [Source:MGI Symbol;Acc:MGI:2443049]	485	476	349	365	422	356	862	533	3.77867	4.00589	2.95506	3.08114	3.74003	3.17064	6.18257	4.72169	3.45519	4.45373	0.775797	0.0495032
ENSMUSG00000052117	D630039A03Rik	RIKEN cDNA D630039A03 gene [Source:MGI Symbol;Acc:MGI:2442889]	3	5	8	1	15	9	12	6	0.0576557	0.103784	0.16707	0.02083	0.327889	0.197698	0.212275	0.131093	0.087335	0.217239	0.402024	0.0184508
ENSMUSG00000042096	Dao	D-amino acid oxidase [Source:MGI Symbol;Acc:MGI:94859]	2	1	4	4	0	0	0	0	0.0270545	0.0146124	0.0587995	0.058626	0	0	0	0	0.0397731	0	Inf	0.00298197
ENSMUSG00000019929	Dcn	decorin [Source:MGI Symbol;Acc:MGI:94872]	1473	821	1026	954	508	676	939	979	11.4977	6.92221	8.70357	8.0682	4.51061	6.03189	6.7474	8.68886	8.79791	6.49469	1.35463	0.0467946
ENSMUSG00000003534	Ddr1	discoidin domain receptor family, member 1 [Source:MGI Symbol;Acc:MGI:99216]	1468	1112	1665	1496	952	930	1024	904	11.8165	9.66858	14.5653	13.0472	8.71695	8.55748	7.58799	8.2738	12.2744	8.28405	1.48169	0.000272274
ENSMUSG00000048489	Depp1	DEPP1 autophagy regulator [Source:MGI Symbol;Acc:MGI:1918730]	38	15	36	28	139	59	66	30	0.679333	0.289654	0.699412	0.542339	2.82666	1.20571	1.08617	0.609803	0.552684	1.43209	0.38593	0.00113439
ENSMUSG00000063109	Dgkeos	diacylglycerol kinase, epsilon, opposite strand [Source:MGI Symbol;Acc:MGI:3041185]	0	4	1	4	8	4	6	7	0	0.0830272	0.0208811	0.083278	0.174882	0.0878753	0.106146	0.152945	0.0467966	0.130462	0.358699	0.0263795
ENSMUSG00000040620	Dhx33	DEAH (Asp-Glu-Ala-His) box polypeptide 33 [Source:MGI Symbol;Acc:MGI:2445102]	949	1031	979	1070	1352	1042	1630	1021	3.52829	4.14048	3.9557	4.31025	5.71793	4.42859	5.57891	4.31615	3.98368	5.01039	0.795083	0.010708
ENSMUSG00000075707	Dio3	deiodinase, iodothyronine type III [Source:MGI Symbol;Acc:MGI:1306782]	145	107	130	87	47	41	76	81	2.26655	1.80666	2.20843	1.47346	0.835718	0.732623	1.09365	1.43965	1.93878	1.02541	1.89073	0.000922281
ENSMUSG00000113581	Dio3os	deiodinase, iodothyronine type III, opposite strand [Source:MGI Symbol;Acc:MGI:2664395]	15	9	8	9	4	4	6	2	0.29598	0.191827	0.171556	0.192417	0.0897775	0.0902348	0.108996	0.0448783	0.212945	0.0834717	2.55111	0.0122454
ENSMUSG00000040856	Dlk1	delta like non-canonical Notch ligand 1 [Source:MGI Symbol;Acc:MGI:94900]	476	83	45	297	103	66	146	90	1.54182	0.290403	0.158412	1.04233	0.379515	0.244384	0.435358	0.331471	0.758242	0.347682	2.18085	0.0302796
ENSMUSG00000060962	Dmkn	dermokine [Source:MGI Symbol;Acc:MGI:1920962]	18	10	14	28	7	4	0	0	0.245766	0.147481	0.207741	0.414209	0.108715	0.0624371	0	0	0.253799	0.042788	5.93155	0.000110338
ENSMUSG00000047143	Dmrta2	doublesex and mab-3 related transcription factor like family A2 [Source:MGI Symbol;Acc:MGI:2653629]	66	63	102	62	38	61	45	41	1.22834	1.26651	2.06308	1.25021	0.804486	1.29778	0.770997	0.867612	1.45203	0.935218	1.55262	0.0339862
ENSMUSG00000038011	Dnah10	dynein, axonemal, heavy chain 10 [Source:MGI Symbol;Acc:MGI:1860299]	11	8	23	33	8	5	5	9	0.0339772	0.0266917	0.0772086	0.110441	0.0281106	0.0176564	0.0142174	0.0316096	0.0620796	0.0228985	2.71108	0.00857609
ENSMUSG00000018581	Dnah11	dynein, axonemal, heavy chain 11 [Source:MGI Symbol;Acc:MGI:1100864]	13	6	26	31	9	2	0	1	0.0473454	0.0236037	0.102907	0.122327	0.0372861	0.00832732	0	0.00414159	0.0740458	0.0124388	5.95283	0.000645087
ENSMUSG00000021879	Dnah12	dynein, axonemal, heavy chain 12 [Source:MGI Symbol;Acc:MGI:107720]	8	3	9	15	1	0	0	2	0.03558	0.0144128	0.0435023	0.0722841	0.00505777	0	0	0.0101157	0.0414448	0.00379336	10.9256	5.92e-05
ENSMUSG00000022262	Dnah5	dynein, axonemal, heavy chain 5 [Source:MGI Symbol;Acc:MGI:107718]	95	53	47	133	31	43	71	49	0.330386	0.199099	0.17764	0.501156	0.122638	0.17095	0.227313	0.193761	0.30207	0.178665	1.6907	0.039553
ENSMUSG00000034706	Dnaic2	dynein, axonemal, intermediate chain 2 [Source:MGI Symbol;Acc:MGI:2685574]	50	41	59	44	40	17	22	11	0.487379	0.431693	0.625013	0.4647	0.44353	0.189424	0.197412	0.121911	0.502196	0.238069	2.10945	0.00382136
ENSMUSG00000026203	Dnajb2	DnaJ heat shock protein family (Hsp40) member B2 [Source:MGI Symbol;Acc:MGI:1928739]	1189	871	913	892	631	658	860	851	7.66293	6.06354	6.3948	6.22872	4.62602	4.84774	5.10242	6.23614	6.5875	5.20308	1.26608	0.0409331
ENSMUSG00000025354	Dnajc14	DnaJ heat shock protein family (Hsp40) member C14 [Source:MGI Symbol;Acc:MGI:1921580]	686	540	818	652	745	787	952	871	3.55972	3.02677	4.61305	3.66573	4.39757	4.66838	4.54771	5.13905	3.71632	4.68818	0.7927	0.0123309
ENSMUSG00000042707	Dnali1	dynein, axonemal, light intermediate polypeptide 1 [Source:MGI Symbol;Acc:MGI:1922813]	28	10	35	33	21	3	1	9	0.713868	0.275395	0.969769	0.91159	0.609047	0.0874427	0.0234796	0.260909	0.717656	0.24522	2.92658	0.0171805
ENSMUSG00000003812	Dnase2a	deoxyribonuclease II alpha [Source:MGI Symbol;Acc:MGI:1329019]	278	199	395	70	219	83	47	71	1.61985	1.2525	2.50133	0.441929	1.45157	0.552852	0.252113	0.470394	1.4539	0.681733	2.13266	0.0280365
ENSMUSG00000027478	Dnmt3b	DNA methyltransferase 3B [Source:MGI Symbol;Acc:MGI:1261819]	12	9	6	15	5	4	2	7	0.0725544	0.058781	0.0394287	0.0982674	0.0343929	0.0276503	0.0111313	0.0481248	0.0672579	0.0303248	2.21792	0.0411132
ENSMUSG00000024501	Dpysl3	dihydropyrimidinase-like 3 [Source:MGI Symbol;Acc:MGI:1349762]	1150	941	833	948	751	319	398	870	8.15265	7.20585	6.41784	7.28166	6.05628	2.58518	2.59745	7.01282	7.2645	4.56293	1.59207	0.0160891
ENSMUSG00000029603	Dtx1	deltex 1, E3 ubiquitin ligase [Source:MGI Symbol;Acc:MGI:1352744]	1781	1522	1654	1566	1288	1312	1600	839	10.1481	9.36767	10.2424	9.66797	8.34839	8.54586	8.39279	5.43573	9.85654	7.68069	1.28329	0.0400058
ENSMUSG00000026564	Dusp27	dual specificity phosphatase 27 (putative) [Source:MGI Symbol;Acc:MGI:2685055]	9	5	9	7	0	3	3	0	0.0651028	0.0390674	0.0707506	0.0548635	0	0.0248092	0.0199783	0	0.0574461	0.0111969	5.13055	0.00135405
ENSMUSG00000019883	Echdc1	enoyl Coenzyme A hydratase domain containing 1 [Source:MGI Symbol;Acc:MGI:1277169]	206	258	205	207	289	329	273	268	2.06044	2.78745	2.22839	2.24329	3.28818	3.76174	2.51374	3.0479	2.32989	3.15289	0.73897	0.0106297
ENSMUSG00000021367	Edn1	endothelin 1 [Source:MGI Symbol;Acc:MGI:95283]	90	75	75	64	120	141	132	83	2.28816	2.05967	2.07226	1.76298	3.47048	4.0979	3.08944	2.39936	2.04577	3.2643	0.62671	0.00233016
ENSMUSG00000003934	Efnb3	ephrin B3 [Source:MGI Symbol;Acc:MGI:109196]	2989	2560	2742	2541	1939	2098	2127	2150	51.0672	47.2444	50.9128	47.0373	37.6841	40.9752	33.454	41.7665	49.0654	38.47	1.27542	0.0131864
ENSMUSG00000022203	Efs	embryonal Fyn-associated substrate [Source:MGI Symbol;Acc:MGI:105311]	191	144	223	153	109	132	104	94	2.03107	1.65405	2.57715	1.76281	1.31851	1.6046	1.0181	1.13656	2.00627	1.26944	1.58044	0.00535594
ENSMUSG00000057561	Eif1a	eukaryotic translation initiation factor 1A [Source:MGI Symbol;Acc:MGI:95298]	300	932	252	831	807	847	1138	966	1.52815	5.12808	1.39504	4.58634	4.67609	4.93205	5.33643	5.59493	3.1594	5.13487	0.615284	0.0237202
ENSMUSG00000022884	Eif4a2	eukaryotic translation initiation factor 4A2 [Source:MGI Symbol;Acc:MGI:106906]	8788	4869	8734	8321	4384	4519	5744	5002	31.0611	18.5892	33.5493	31.8657	17.6263	18.2587	18.6898	20.1022	28.7663	18.6693	1.54084	0.000437256
ENSMUSG00000021282	Eif5	eukaryotic translation initiation factor 5 [Source:MGI Symbol;Acc:MGI:95309]	1912	1848	1768	2455	2451	3410	4176	1697	5.47108	5.71191	5.49807	7.61128	7.97798	11.1542	11.0004	5.52128	6.07308	8.91348	0.681337	0.00329725
ENSMUSG00000008489	Elavl2	ELAV like RNA binding protein 1 [Source:MGI Symbol;Acc:MGI:1100887]	693	1169	951	885	1060	1199	1775	1169	2.10857	3.84206	3.1447	2.91756	3.66882	4.17037	4.97185	4.04429	3.00322	4.21383	0.712706	0.00231367
ENSMUSG00000006390	Elovl1	elongation of very long chain fatty acids (FEN1/Elo2, SUR4/Elo3, yeast)-like 1 [Source:MGI Symbol;Acc:MGI:1858959]	213	185	252	204	133	152	178	149	2.18141	2.04656	2.80479	2.26365	1.54944	1.77952	1.67819	1.73508	2.3241	1.68556	1.37883	0.0219521
ENSMUSG00000021696	Elovl7	ELOVL family member 7, elongation of long chain fatty acids (yeast) [Source:MGI Symbol;Acc:MGI:1921809]	217	203	276	199	140	171	141	128	2.01689	2.03804	2.78788	2.00399	1.48018	1.81685	1.20644	1.35271	2.2117	1.46405	1.51068	0.00651567
ENSMUSG00000029163	Emilin1	elastin microfibril interfacer 1 [Source:MGI Symbol;Acc:MGI:1926189]	36	30	46	37	30	24	23	8	0.240034	0.216068	0.333334	0.2673	0.227545	0.182933	0.141177	0.0606518	0.264184	0.153077	1.72583	0.0394339
ENSMUSG00000058070	Eml1	echinoderm microtubule associated protein like 1 [Source:MGI Symbol;Acc:MGI:1915769]	987	905	762	942	664	685	734	733	4.08049	4.04146	3.42368	4.21956	3.12268	3.23732	2.79354	3.44566	3.9413	3.1498	1.25129	0.0382715
ENSMUSG00000030208	Emp1	epithelial membrane protein 1 [Source:MGI Symbol;Acc:MGI:107941]	39	31	49	45	61	71	74	45	0.332531	0.285512	0.454053	0.415718	0.591651	0.692029	0.580847	0.43627	0.371954	0.575199	0.646651	0.0116112
ENSMUSG00000022505	Emp2	epithelial membrane protein 2 [Source:MGI Symbol;Acc:MGI:1098726]	340	337	419	338	221	287	304	275	2.12429	2.27435	2.84506	2.28808	1.57069	2.04982	1.74853	1.95362	2.38294	1.83066	1.30168	0.0431212
ENSMUSG00000038173	Enpp6	ectonucleotide pyrophosphatase/phosphodiesterase 6 [Source:MGI Symbol;Acc:MGI:2445171]	115	106	108	92	70	74	39	76	0.726858	0.72369	0.741852	0.630033	0.50329	0.534668	0.226925	0.546187	0.705608	0.452767	1.55843	0.0235157
ENSMUSG00000024376	Epb41l4a	erythrocyte membrane protein band 4.1 like 4a [Source:MGI Symbol;Acc:MGI:103007]	111	56	85	69	35	59	60	51	0.576815	0.314337	0.48004	0.388492	0.206892	0.350479	0.287032	0.30134	0.439921	0.286436	1.53585	0.034358
ENSMUSG00000032537	Ephb1	Eph receptor B1 [Source:MGI Symbol;Acc:MGI:1096337]	523	512	503	502	397	339	541	329	2.95283	3.12249	3.08637	3.07087	2.54972	2.18794	2.81189	2.11206	3.05814	2.4154	1.2661	0.049038
ENSMUSG00000005958	Ephb3	Eph receptor B3 [Source:MGI Symbol;Acc:MGI:104770]	390	330	354	317	244	246	352	212	1.95114	1.78333	1.92473	1.71832	1.3886	1.40688	1.62118	1.20596	1.84438	1.40565	1.31211	0.0354299
ENSMUSG00000115388	Eppk1	epiplakin 1 [Source:MGI Symbol;Acc:MGI:2386306]	5	7	17	15	3	3	3	3	0.0220503	0.0333435	0.0814719	0.0716686	0.0150491	0.0151245	0.0121794	0.0150443	0.0521336	0.0143493	3.63317	0.00247568
ENSMUSG00000018166	Erbb3	erb-b2 receptor tyrosine kinase 3 [Source:MGI Symbol;Acc:MGI:95411]	218	165	182	189	107	132	142	112	1.97062	1.6111	1.78797	1.85109	1.10025	1.36402	1.18167	1.15117	1.80519	1.19928	1.50524	0.00350831
ENSMUSG00000026830	Ermn	ermin, ERM-like protein [Source:MGI Symbol;Acc:MGI:1925017]	1166	1110	988	1044	757	784	787	903	17.444	17.9377	16.0638	16.9227	12.8828	13.408	10.8389	15.3606	17.0921	13.1226	1.30249	0.0144105
ENSMUSG00000042379	Esm1	endothelial cell-specific molecule 1 [Source:MGI Symbol;Acc:MGI:1918940]	9	6	29	2	2	5	7	2	0.233401	0.168074	0.817337	0.0561938	0.0590101	0.14824	0.167108	0.0589817	0.318752	0.108335	2.94228	0.0495385
ENSMUSG00000024955	Esrra	estrogen related receptor, alpha [Source:MGI Symbol;Acc:MGI:1346831]	936	727	765	612	542	380	745	608	7.42218	6.22708	6.59264	5.25809	4.88899	3.4446	5.43845	5.48191	6.375	4.81349	1.3244	0.0358002
ENSMUSG00000019232	Etnppl	ethanolamine phosphate phospholyase [Source:MGI Symbol;Acc:MGI:1919010]	288	195	447	431	845	528	604	426	1.44723	1.05846	2.44116	2.34663	4.83022	3.03304	2.79413	2.43404	1.82337	3.27286	0.557119	0.000584784
ENSMUSG00000039356	Exosc2	exosome component 2 [Source:MGI Symbol;Acc:MGI:2385133]	259	185	287	190	156	162	172	149	3.23493	2.49592	3.89574	2.57123	2.21643	2.31302	1.97769	2.11605	3.04945	2.1558	1.41454	0.0208894
ENSMUSG00000097331	F420014N23Rik	RIKEN cDNA F420014N23 gene [Source:MGI Symbol;Acc:MGI:3642477]	3	7	4	3	25	4	12	5	0.054443	0.137201	0.0788702	0.0589881	0.516024	0.0829787	0.200447	0.103153	0.0823757	0.225651	0.365058	0.0267608
ENSMUSG00000033579	Fa2h	fatty acid 2-hydroxylase [Source:MGI Symbol;Acc:MGI:2443327]	647	525	589	593	301	340	426	374	5.84176	5.12028	5.7796	5.80117	3.09152	3.50929	3.5409	3.83959	5.6357	3.49532	1.61236	7.76e-06
ENSMUSG00000019874	Fabp7	fatty acid binding protein 7, brain [Source:MGI Symbol;Acc:MGI:101916]	214	174	196	202	92	154	152	152	7.70199	6.76444	7.66631	7.877	3.76654	6.33589	5.03611	6.2202	7.50244	5.33969	1.40503	0.0315895
ENSMUSG00000075217	Fads2b	fatty acid desaturase 2B [Source:MGI Symbol;Acc:MGI:2687041]	5	2	3	5	0	0	0	0	0.119685	0.0517093	0.0780284	0.129677	0	0	0	0	0.0947749	0	Inf	0.000265267
ENSMUSG00000021750	Fam107a	family with sequence similarity 107, member A [Source:MGI Symbol;Acc:MGI:3041256]	7770	6802	6836	6961	11486	9475	8570	7790	74.4705	70.4198	71.2047	72.2863	125.227	103.811	75.6151	84.8934	72.0953	97.3865	0.740301	0.00189044
ENSMUSG00000022434	Fam118a	family with sequence similarity 118, member A [Source:MGI Symbol;Acc:MGI:1920475]	294	464	277	234	180	196	266	242	2.63919	4.49921	2.70238	2.27594	1.83807	2.01131	2.19821	2.47009	3.02918	2.12942	1.42254	0.0352195
ENSMUSG00000006218	Fam131c	family with sequence similarity 131, member C [Source:MGI Symbol;Acc:MGI:2685539]	65	54	53	48	28	46	37	26	2.46672	2.21358	2.18589	1.97365	1.20873	1.99557	1.29263	1.12188	2.20996	1.4047	1.57326	0.0245339
ENSMUSG00000042788	Fam166b	family with sequence similarity 166, member B [Source:MGI Symbol;Acc:MGI:2445194]	12	8	11	17	0	4	2	0	0.219346	0.157961	0.218518	0.336691	0	0.0835923	0.0336521	0	0.233129	0.0293111	7.95361	7.88e-06
ENSMUSG00000029182	Fam166c	family with sequence similarity 166, member C [Source:MGI Symbol;Acc:MGI:1922684]	15	13	25	16	8	3	0	3	0.358558	0.335667	0.64946	0.414403	0.217545	0.0819848	0	0.0815502	0.439522	0.09527	4.61344	7.13e-05
ENSMUSG00000045655	Fam216b	family with sequence similarity 216, member B [Source:MGI Symbol;Acc:MGI:2145738]	14	5	10	19	2	0	0	1	0.189348	0.0730437	0.146977	0.278412	0.0307745	0	0	0.0153798	0.171945	0.0115386	14.9018	7.66e-07
ENSMUSG00000041930	Fam222a	family with sequence similarity 222, member A [Source:MGI Symbol;Acc:MGI:3605543]	122	120	115	119	59	63	109	82	1.80484	1.91758	1.84891	1.90741	0.992874	1.06541	1.48446	1.37932	1.86968	1.23052	1.51943	0.0105719
ENSMUSG00000078235	Fam43b	family with sequence similarity 43, member B [Source:MGI Symbol;Acc:MGI:3651622]	717	736	865	651	502	518	743	542	15.9999	17.7407	20.9776	15.7398	12.7428	13.2138	15.2634	13.7521	17.6145	13.743	1.2817	0.0318415
ENSMUSG00000057068	Fam47e	family with sequence similarity 47, member E [Source:MGI Symbol;Acc:MGI:2686227]	9	2	8	17	4	2	3	2	0.104292	0.0250338	0.100748	0.213436	0.0527225	0.0264955	0.0320044	0.0263551	0.110877	0.0343944	3.22371	0.0155359
ENSMUSG00000030956	Fam53b	family with sequence similarity 53, member B [Source:MGI Symbol;Acc:MGI:1925188]	620	442	628	679	410	414	487	471	1.53474	1.18184	1.68945	1.8211	1.15449	1.1715	1.10978	1.32567	1.55678	1.19036	1.30782	0.0299602
ENSMUSG00000055184	Fam72a	family with sequence similarity 72, member A [Source:MGI Symbol;Acc:MGI:1919669]	41	23	29	21	11	15	16	9	1.01764	0.616641	0.782271	0.564734	0.310589	0.425612	0.365594	0.254002	0.745321	0.338949	2.19892	0.00246811
ENSMUSG00000024778	Fas	Fas (TNF receptor superfamily member 6) [Source:MGI Symbol;Acc:MGI:95484]	39	32	43	38	63	66	55	38	0.715548	0.634189	0.857398	0.755414	1.31486	1.38427	0.928973	0.792746	0.740637	1.10521	0.670132	0.0286962
ENSMUSG00000064080	Fbln2	fibulin 2 [Source:MGI Symbol;Acc:MGI:95488]	132	91	110	129	72	77	97	50	0.735489	0.547695	0.666101	0.778781	0.456351	0.49045	0.497555	0.316771	0.682016	0.440282	1.54905	0.0123167
ENSMUSG00000051639	Fbl-ps2	fibrillarin, pseudogene 2 [Source:MGI Symbol;Acc:MGI:3644887]	15	39	20	26	59	28	85	44	0.852372	2.39387	1.2351	1.60079	3.8138	1.81883	4.44655	2.84294	1.52053	3.23053	0.470676	0.00224427
ENSMUSG00000015852	Fcrls	Fc receptor-like S, scavenger receptor [Source:MGI Symbol;Acc:MGI:1933397]	510	462	443	488	657	660	570	474	10.3681	10.1453	9.78758	10.749	15.1935	15.3381	10.6676	10.9567	10.2625	13.039	0.787062	0.0176103
ENSMUSG00000024742	Fen1	flap structure specific endonuclease 1 [Source:MGI Symbol;Acc:MGI:102779]	77	71	61	55	301	208	288	42	0.59769	0.595299	0.514587	0.462561	2.65775	1.84563	2.05797	0.370683	0.542534	1.73301	0.313059	3.33e-05
ENSMUSG00000054779	Fgf2os	fibroblast growth factor 2, opposite strand [Source:MGI Symbol;Acc:MGI:3649376]	0	0	1	0	0	5	3	3	0	0	0.0410087	0	0	0.215724	0.104231	0.128749	0.0102522	0.112176	0.0913936	0.0244343
ENSMUSG00000027208	Fgf7	fibroblast growth factor 7 [Source:MGI Symbol;Acc:MGI:95521]	14	9	6	10	14	18	23	11	0.138054	0.0958615	0.0643014	0.106834	0.157042	0.202895	0.208784	0.123326	0.101263	0.173012	0.585294	0.0481152
ENSMUSG00000030849	Fgfr2	fibroblast growth factor receptor 2 [Source:MGI Symbol;Acc:MGI:95523]	738	647	630	625	407	460	616	502	2.31719	2.19434	2.14975	2.12621	1.45366	1.65106	1.78053	1.79218	2.19687	1.66936	1.316	0.0116673
ENSMUSG00000031594	Fgl1	fibrinogen-like protein 1 [Source:MGI Symbol;Acc:MGI:102795]	7	13	5	2	0	0	4	3	0.0757278	0.151908	0.0587883	0.0234411	0	0	0.0398309	0.0369061	0.0774664	0.0191842	4.03802	0.0264802
ENSMUSG00000075012	Fjx1	four jointed box 1 [Source:MGI Symbol;Acc:MGI:1341907]	1455	1166	1396	1209	854	924	1213	1134	25.2474	21.8548	26.3258	22.7301	16.8569	18.3284	19.3766	22.3738	24.0395	19.2339	1.24985	0.0428105
ENSMUSG00000003355	Fkbp11	FK506 binding protein 11 [Source:MGI Symbol;Acc:MGI:1913370]	16	13	19	12	3	6	7	8	0.198071	0.173832	0.255611	0.160945	0.0422457	0.0849007	0.0797693	0.112606	0.197115	0.0798803	2.46762	0.00548625
ENSMUSG00000024222	Fkbp5	FK506 binding protein 5 [Source:MGI Symbol;Acc:MGI:104670]	1442	1249	1563	1333	2012	1633	1920	1469	4.33467	4.05553	5.10613	4.34152	6.87991	5.61146	5.31319	5.02094	4.45946	5.70638	0.781487	0.00500865
ENSMUSG00000020357	Flt4	FMS-like tyrosine kinase 4 [Source:MGI Symbol;Acc:MGI:95561]	88	56	58	77	113	102	104	71	0.552675	0.379898	0.395872	0.523962	0.807285	0.732291	0.601289	0.507008	0.463102	0.661968	0.699583	0.0252563
ENSMUSG00000066595	Flvcr1	feline leukemia virus subgroup C cellular receptor 1 [Source:MGI Symbol;Acc:MGI:2444881]	154	100	68	103	176	142	126	166	0.726724	0.509734	0.348737	0.526635	0.944774	0.766018	0.547373	0.890697	0.527958	0.787215	0.670665	0.0206515
ENSMUSG00000036053	Fmnl2	formin-like 2 [Source:MGI Symbol;Acc:MGI:1918659]	645	517	568	623	667	797	849	680	5.3283	4.61332	5.09942	5.5762	6.26787	7.5264	6.45655	6.38721	5.15431	6.65951	0.773977	0.0037016
ENSMUSG00000040170	Fmo2	flavin containing monooxygenase 2 [Source:MGI Symbol;Acc:MGI:1916776]	93	53	63	62	182	73	105	58	0.505597	0.311238	0.372226	0.365201	1.12554	0.453675	0.525502	0.358528	0.388566	0.61581	0.630983	0.039287
ENSMUSG00000075415	Fnbp1	formin binding protein 1 [Source:MGI Symbol;Acc:MGI:109606]	1885	1776	1635	1823	1469	1355	1076	1299	4.87398	4.96032	4.59444	5.10717	4.32075	4.00508	2.56123	3.81904	4.88398	3.67653	1.32842	0.015579
ENSMUSG00000024912	Fosl1	fos-like antigen 1 [Source:MGI Symbol;Acc:MGI:107179]	0	1	0	0	5	7	6	0	0	0.0216201	0	0	0.11385	0.160155	0.110561	0	0.00540502	0.0961413	0.0562196	0.00221503
ENSMUSG00000034227	Foxj1	forkhead box J1 [Source:MGI Symbol;Acc:MGI:1347474]	168	68	238	175	89	52	51	43	3.48309	1.52285	5.3626	3.93109	2.09899	1.23241	0.973389	1.01367	3.57491	1.32962	2.68868	8.21e-05
ENSMUSG00000044167	Foxo1	forkhead box O1 [Source:MGI Symbol;Acc:MGI:1890077]	848	732	861	816	525	572	826	621	5.32206	4.96238	5.8726	5.54875	3.74808	4.10374	4.77231	4.43148	5.42645	4.2639	1.27265	0.0292252
ENSMUSG00000052135	Foxo6	forkhead box O6 [Source:MGI Symbol;Acc:MGI:2676586]	781	558	812	713	364	443	523	435	16.2417	12.5346	18.3519	16.0654	8.61087	10.5314	10.0126	10.2859	15.7984	9.86019	1.60224	3.66e-05
ENSMUSG00000024816	Frmd8	FERM domain containing 8 [Source:MGI Symbol;Acc:MGI:1914707]	475	449	485	504	364	311	329	322	4.38861	4.48098	4.86986	5.04527	3.82559	3.28468	2.79829	3.38269	4.69618	3.32281	1.41331	0.00225099
ENSMUSG00000108841	Frmpd2	FERM and PDZ domain containing 2 [Source:MGI Symbol;Acc:MGI:2685472]	13	9	32	22	5	0	2	3	0.084112	0.0629002	0.225013	0.154227	0.036803	0	0.0119113	0.0220734	0.131563	0.0176969	7.43423	4.59e-06
ENSMUSG00000033386	Frrs1	ferric-chelate reductase 1 [Source:MGI Symbol;Acc:MGI:108076]	10	10	29	22	22	24	36	37	0.0635795	0.0686797	0.200392	0.151559	0.159118	0.174442	0.210717	0.267492	0.121053	0.202942	0.596488	0.0472107
ENSMUSG00000057092	Fxyd3	FXYD domain-containing ion transport regulator 3 [Source:MGI Symbol;Acc:MGI:107497]	16	34	85	104	39	12	2	7	0.111856	0.256745	0.645793	0.78774	0.310144	0.0958992	0.0128699	0.0556414	0.450533	0.118639	3.79753	0.00712949
ENSMUSG00000009687	Fxyd5	FXYD domain-containing ion transport regulator 5 [Source:MGI Symbol;Acc:MGI:1201785]	85	70	84	71	93	125	121	83	0.654831	0.582508	0.703282	0.592635	0.815	1.10083	0.85814	0.727048	0.633314	0.875253	0.723578	0.0236068
ENSMUSG00000066705	Fxyd6	FXYD domain-containing ion transport regulator 6 [Source:MGI Symbol;Acc:MGI:1890226]	2415	1774	2099	1861	1244	1412	2003	1556	24.4885	19.4309	23.1313	20.4462	14.3493	16.3674	18.6978	17.9402	21.8742	16.8387	1.29905	0.0177785
ENSMUSG00000086308	G630016G05Rik	RIKEN cDNA G630016G05 gene [Source:MGI Symbol;Acc:MGI:3603178]	2	0	2	3	5	3	8	5	0.0259321	0	0.02818	0.0421524	0.0737552	0.0444719	0.0954956	0.0737124	0.0240661	0.0718588	0.334909	0.0324482
ENSMUSG00000031714	Gab1	growth factor receptor bound protein 2-associated protein 1 [Source:MGI Symbol;Acc:MGI:108088]	545	403	466	410	274	373	348	286	3.63746	2.90537	3.38011	2.96488	2.08026	2.84584	2.13819	2.17041	3.22195	2.30867	1.39559	0.00742997
ENSMUSG00000021903	Galnt15	polypeptide N-acetylgalactosaminyltransferase 15 [Source:MGI Symbol;Acc:MGI:1926004]	76	61	54	68	275	129	135	79	0.457697	0.396816	0.35343	0.443708	1.88392	0.888086	0.748451	0.540959	0.412913	1.01535	0.406669	8.13e-05
ENSMUSG00000037280	Galnt6	polypeptide N-acetylgalactosaminyltransferase 6 [Source:MGI Symbol;Acc:MGI:1891640]	280	262	271	277	218	162	184	158	2.45753	2.48392	2.58496	2.63416	2.17652	1.62539	1.4867	1.57678	2.54014	1.71635	1.47997	0.00337441
ENSMUSG00000114755	Galr3	galanin receptor 3 [Source:MGI Symbol;Acc:MGI:1329003]	0	0	3	0	5	7	2	2	0	0	0.142394	0	0.248457	0.349511	0.0804136	0.099345	0.0355985	0.194432	0.18309	0.020924
ENSMUSG00000020150	Gamt	guanidinoacetate methyltransferase [Source:MGI Symbol;Acc:MGI:1098221]	245	240	242	228	181	189	164	170	4.87683	5.16033	5.23516	4.91732	4.0984	4.30064	3.00525	3.84765	5.04741	3.81299	1.32374	0.0408783
ENSMUSG00000034201	Gas2l1	growth arrest-specific 2 like 1 [Source:MGI Symbol;Acc:MGI:1926176]	976	541	589	859	822	971	1036	977	4.50488	2.69728	2.95455	4.29584	4.31589	5.12333	4.40208	5.12745	3.61314	4.74219	0.761914	0.0157295
ENSMUSG00000038233	Gask1a	golgi associated kinase 1A [Source:MGI Symbol;Acc:MGI:3041196]	106	91	75	78	22	32	44	28	0.926164	0.858853	0.712173	0.738412	0.21866	0.319619	0.353916	0.278171	0.8089	0.292592	2.76461	3.11e-08
ENSMUSG00000027199	Gatm	glycine amidinotransferase (L-arginine:glycine amidinotransferase) [Source:MGI Symbol;Acc:MGI:1914342]	2388	2090	1917	1912	1561	1394	1677	1708	38.2176	36.1302	33.3422	33.1542	28.4182	25.503	24.7074	31.0807	35.2111	27.4273	1.28379	0.0144104
ENSMUSG00000109523	Gdf1	growth differentiation factor 1 [Source:MGI Symbol;Acc:MGI:95683]	1564	1313	1829	1424	1192	1189	1346	1104	63.0489	57.1742	80.1304	62.1974	54.6615	54.7927	49.9517	50.6038	65.6377	52.5024	1.25019	0.0394226
ENSMUSG00000031821	Gins2	GINS complex subunit 2 (Psf2 homolog) [Source:MGI Symbol;Acc:MGI:1921019]	117	157	110	147	131	44	24	83	1.3261	1.92215	1.35497	1.80522	1.68899	0.570094	0.250422	1.06966	1.60211	0.894793	1.79048	0.0473979
ENSMUSG00000047797	Gjb1	gap junction protein, beta 1 [Source:MGI Symbol;Acc:MGI:95719]	295	219	230	273	121	156	162	206	9.39812	7.53629	7.96326	9.42329	4.385	5.68124	4.75113	7.46209	8.58024	5.56986	1.54048	0.00481056
ENSMUSG00000043448	Gjc2	gap junction protein, gamma 2 [Source:MGI Symbol;Acc:MGI:2153060]	381	292	405	352	178	190	218	241	9.20864	7.62338	10.6382	9.21795	4.89389	5.24957	4.85055	6.62309	9.17204	5.40428	1.69718	5.4e-05
ENSMUSG00000030048	Gkn3	gastrokine 3 [Source:MGI Symbol;Acc:MGI:1916138]	31	39	28	17	6	4	5	12	1.96945	2.67632	1.93318	1.17016	0.433611	0.290522	0.29242	0.866804	1.93728	0.470839	4.11452	4.75e-06
ENSMUSG00000029638	Glcci1	glucocorticoid induced transcript 1 [Source:MGI Symbol;Acc:MGI:2179717]	677	147	536	687	143	226	388	201	3.39166	0.79549	2.91831	3.72907	0.814936	1.29429	1.78945	1.14496	2.70863	1.26091	2.14816	0.00280007
ENSMUSG00000049928	Glp2r	glucagon-like peptide 2 receptor [Source:MGI Symbol;Acc:MGI:2136733]	70	32	75	37	108	56	111	68	0.641187	0.316614	0.7466	0.367205	1.12532	0.586375	0.935992	0.708223	0.517902	0.838977	0.617301	0.0214715
ENSMUSG00000000149	Gna12	guanine nucleotide binding protein, alpha 12 [Source:MGI Symbol;Acc:MGI:95767]	2254	1918	2044	2214	1582	1411	1780	1657	27.2029	25.0037	26.8093	28.9508	21.7186	19.4665	19.7763	22.7383	26.9917	20.9249	1.28993	0.00885576
ENSMUSG00000029713	Gnb2	guanine nucleotide binding protein (G protein), beta 2 [Source:MGI Symbol;Acc:MGI:95784]	3753	3695	4306	3342	2609	2207	3890	2592	22.5046	23.9333	28.0615	21.7131	17.7964	15.1285	21.4737	17.6726	24.0531	18.0178	1.33496	0.00948778
ENSMUSG00000038607	Gng10	guanine nucleotide binding protein (G protein), gamma 10 [Source:MGI Symbol;Acc:MGI:1336169]	349	662	567	469	822	495	684	639	14.4439	29.5944	25.5026	21.0306	38.6985	23.4187	26.0602	30.0698	22.6429	29.5618	0.76595	0.0418737
ENSMUSG00000032766	Gng11	guanine nucleotide binding protein (G protein), gamma 11 [Source:MGI Symbol;Acc:MGI:1913316]	207	164	184	148	99	98	128	151	12.2492	10.4828	11.8331	9.489	6.66404	6.62925	6.97289	10.1598	11.0135	7.6065	1.44791	0.0200477
ENSMUSG00000034109	Golim4	golgi integral membrane protein 4 [Source:MGI Symbol;Acc:MGI:1920374]	277	290	215	294	424	301	514	403	0.757391	0.856509	0.638884	0.870981	1.31877	0.94082	1.2938	1.25291	0.780941	1.20157	0.649932	0.000195581
ENSMUSG00000039720	Got1l1	glutamic-oxaloacetic transaminase 1-like 1 [Source:MGI Symbol;Acc:MGI:1923865]	12	2	9	16	8	1	3	1	0.234563	0.0422299	0.191194	0.338881	0.177899	0.0223479	0.0539888	0.0222294	0.201717	0.0691163	2.91852	0.0367489
ENSMUSG00000055653	Gpc3	glypican 3 [Source:MGI Symbol;Acc:MGI:104903]	115	68	104	76	50	43	55	56	2.01414	1.28645	1.97956	1.4422	0.996151	0.860914	0.886788	1.11519	1.68059	0.964762	1.74197	0.00199725
ENSMUSG00000036357	Gpr101	G protein-coupled receptor 101 [Source:MGI Symbol;Acc:MGI:2685211]	284	231	129	180	100	133	106	152	2.85478	2.5082	1.40925	1.96042	1.14346	1.52829	0.980901	1.73729	2.18316	1.34748	1.62018	0.0108858
ENSMUSG00000066197	Gpr139	G protein-coupled receptor 139 [Source:MGI Symbol;Acc:MGI:2685341]	28	29	13	18	1	5	11	10	0.314409	0.351747	0.158649	0.218997	0.0127692	0.0641873	0.113712	0.127681	0.260951	0.0795874	3.27879	0.000691272
ENSMUSG00000052229	Gpr17	G protein-coupled receptor 17 [Source:MGI Symbol;Acc:MGI:3584514]	714	575	621	717	319	467	502	408	7.47422	6.50174	7.06483	8.13219	3.7986	5.58835	4.83766	4.85624	7.29324	4.77021	1.52891	0.000288634
ENSMUSG00000117239	Gpr31c	G protein-coupled receptor 31, D17Leh66c region [Source:MGI Symbol;Acc:MGI:1354371]	0	1	2	0	4	3	7	1	0	0.0111634	0.0224605	0	0.0470214	0.0354457	0.0665957	0.0117526	0.00840597	0.0402039	0.209084	0.0257289
ENSMUSG00000026271	Gpr35	G protein-coupled receptor 35 [Source:MGI Symbol;Acc:MGI:1929509]	6	5	6	4	11	16	9	6	0.0227784	0.0205047	0.0247572	0.0164533	0.0475077	0.0694377	0.031457	0.0259	0.0211234	0.0435756	0.484752	0.0331954
ENSMUSG00000039904	Gpr37	G protein-coupled receptor 37 [Source:MGI Symbol;Acc:MGI:1313297]	1605	1369	1166	1250	856	961	1164	1049	10.8981	10.0409	8.60431	9.19615	6.61169	7.45929	7.27598	8.09885	9.68486	7.36145	1.31562	0.00978853
ENSMUSG00000026343	Gpr39	G protein-coupled receptor 39 [Source:MGI Symbol;Acc:MGI:1918361]	13	21	11	13	0	3	3	11	0.185117	0.323011	0.170225	0.200571	0	0.0488388	0.0393288	0.178094	0.219731	0.0665654	3.30097	0.00640891
ENSMUSG00000021886	Gpr65	G-protein coupled receptor 65 [Source:MGI Symbol;Acc:MGI:108031]	2	3	4	2	20	32	11	4	0.052566	0.0851742	0.114246	0.0569543	0.597968	0.961485	0.26617	0.11953	0.077235	0.486288	0.158826	0.000112554
ENSMUSG00000046733	Gprc5a	G protein-coupled receptor, family C, group 5, member A [Source:MGI Symbol;Acc:MGI:1891250]	3	0	0	0	3	5	9	1	0.0783321	0	0	0	0.0890952	0.149236	0.216318	0.029689	0.019583	0.121085	0.16173	0.0166974
ENSMUSG00000008734	Gprc5b	G protein-coupled receptor, family C, group 5, member B [Source:MGI Symbol;Acc:MGI:1927596]	3202	3266	3378	3214	2337	2022	2984	2550	24.3403	26.8173	27.9066	26.471	20.2082	17.5705	20.8817	22.0403	26.3838	20.1752	1.30773	0.00615355
ENSMUSG00000022546	Gpt	glutamic pyruvic transaminase, soluble [Source:MGI Symbol;Acc:MGI:95802]	241	189	189	173	122	126	157	123	1.27577	1.08072	1.08733	0.992252	0.734648	0.762475	0.7651	0.740344	1.10902	0.750642	1.47743	0.00458004
ENSMUSG00000063856	Gpx1	glutathione peroxidase 1 [Source:MGI Symbol;Acc:MGI:104887]	1007	981	519	858	1385	1152	1155	1061	16.0499	16.8891	8.98989	14.8167	25.1107	20.9892	16.9469	19.2279	14.1864	20.5687	0.68971	0.00296256
ENSMUSG00000074259	Gramd2	GRAM domain containing 2 [Source:MGI Symbol;Acc:MGI:3528937]	51	48	33	40	54	86	75	48	0.386011	0.392429	0.271445	0.328029	0.464924	0.744089	0.522578	0.413082	0.344479	0.536168	0.642482	0.0151515
ENSMUSG00000074934	Grem1	gremlin 1, DAN family BMP antagonist [Source:MGI Symbol;Acc:MGI:1344337]	92	149	94	111	131	172	142	145	1.20616	2.11006	1.33933	1.57673	1.95366	2.57776	1.71382	2.1615	1.55807	2.10169	0.741342	0.045752
ENSMUSG00000010825	Grid2ip	glutamate receptor, ionotropic, delta 2 (Grid2) interacting protein 1 [Source:MGI Symbol;Acc:MGI:2176213]	21	24	16	21	4	10	24	5	0.13824	0.170658	0.114468	0.14978	0.0299512	0.0752519	0.145445	0.0374228	0.143286	0.0720178	1.98959	0.048252
ENSMUSG00000001985	Grik3	glutamate receptor, ionotropic, kainate 3 [Source:MGI Symbol;Acc:MGI:95816]	1137	894	727	1098	658	637	1003	573	6.89089	5.85258	4.78843	7.21005	4.53634	4.41321	5.59603	3.9486	6.18549	4.62354	1.33782	0.0243227
ENSMUSG00000079507	H2-Q1	histocompatibility 2, Q region locus 1 [Source:MGI Symbol;Acc:MGI:95928]	0	0	32	0	0	0	1	0	0	0	0.403507	0	0	0	0.0106853	0	0.100877	0.00267132	37.7629	0.0198286
ENSMUSG00000081176	H3f3a-ps2	H3.3 histone A, pseudogene 2 [Source:MGI Symbol;Acc:MGI:1101758]	235	222	253	195	166	142	184	164	31.0942	31.7291	36.3811	27.9554	24.9852	21.4783	22.4126	24.6733	31.7899	23.3874	1.35928	0.0240942
ENSMUSG00000006930	Hap1	huntingtin-associated protein 1 [Source:MGI Symbol;Acc:MGI:1261831]	2180	1541	1826	1647	1192	1331	1611	1478	22.343	17.0601	20.339	18.2894	13.8972	15.5942	15.2001	17.224	19.5079	15.4788	1.26029	0.0328889
ENSMUSG00000030606	Hapln3	hyaluronan and proteoglycan link protein 3 [Source:MGI Symbol;Acc:MGI:1914916]	25	24	29	26	15	13	9	17	0.278772	0.289072	0.351437	0.314119	0.190266	0.165711	0.0923909	0.215541	0.30835	0.165977	1.85778	0.0129993
ENSMUSG00000022177	Haus4	HAUS augmin-like complex, subunit 4 [Source:MGI Symbol;Acc:MGI:1261794]	51	71	53	54	83	77	70	78	0.752644	1.1318	0.850036	0.863434	1.39335	1.29899	0.950994	1.30882	0.899477	1.23804	0.726533	0.0408461
ENSMUSG00000020399	Havcr2	hepatitis A virus cellular receptor 2 [Source:MGI Symbol;Acc:MGI:2159682]	58	96	84	99	117	163	113	86	0.635527	1.13625	1.0003	1.17534	1.45835	2.04172	1.13986	1.07147	0.986853	1.42785	0.691147	0.0363079
ENSMUSG00000069919	Hba-a1	hemoglobin alpha, adult chain 1 [Source:MGI Symbol;Acc:MGI:96015]	1778	1676	2771	1438	6324	2967	3126	1241	81.0483	82.5241	137.275	71.0219	327.921	154.607	131.179	64.3216	92.9674	169.507	0.548457	0.00788267
ENSMUSG00000069917	Hba-a2	hemoglobin alpha, adult chain 2 [Source:MGI Symbol;Acc:MGI:96016]	217	236	406	180	761	376	395	190	11.2603	13.2281	22.8961	10.1201	44.9201	22.3038	18.8691	11.2103	14.3762	24.3258	0.590983	0.0186531
ENSMUSG00000052305	Hbb-bs	hemoglobin, beta adult s chain [Source:MGI Symbol;Acc:MGI:5474852]	798	868	1014	620	3273	1613	1559	581	31.4696	36.9746	43.458	26.4912	146.825	72.7148	56.5977	26.0518	34.5983	75.5473	0.457969	0.000739076
ENSMUSG00000073940	Hbb-bt	hemoglobin, beta adult t chain [Source:MGI Symbol;Acc:MGI:5474850]	1699	1654	2251	1383	4661	2672	2867	1075	131.429	138.206	189.241	115.915	410.149	236.284	204.169	94.5538	143.698	236.289	0.608146	0.0109598
ENSMUSG00000049241	Hcar1	hydrocarboxylic acid receptor 1 [Source:MGI Symbol;Acc:MGI:2441671]	12	7	20	12	8	6	8	3	0.198647	0.125173	0.359815	0.21523	0.150659	0.113537	0.12192	0.056477	0.224716	0.110648	2.0309	0.0444611
ENSMUSG00000004328	Hif3a	hypoxia inducible factor 3, alpha subunit [Source:MGI Symbol;Acc:MGI:1859778]	213	114	167	166	343	248	271	141	1.56998	0.907639	1.33775	1.3257	2.87589	2.08962	1.83885	1.1817	1.28527	1.99652	0.643755	0.0100364
ENSMUSG00000066842	Hmcn1	hemicentin 1 [Source:MGI Symbol;Acc:MGI:2685047]	59	43	18	62	15	19	16	17	0.141651	0.111514	0.0469651	0.161278	0.0409663	0.0521452	0.0353634	0.0464083	0.115352	0.0437208	2.63837	0.000452333
ENSMUSG00000034997	Htr2a	5-hydroxytryptamine (serotonin) receptor 2A [Source:MGI Symbol;Acc:MGI:109521]	354	387	293	384	422	414	589	371	3.43402	4.05513	3.08895	4.03601	4.65669	4.59092	5.25991	4.0921	3.65353	4.64991	0.78572	0.0167069
ENSMUSG00000037405	Icam1	intercellular adhesion molecule 1 [Source:MGI Symbol;Acc:MGI:96392]	43	42	74	71	219	105	54	36	0.506038	0.533901	0.946434	0.905304	2.93174	1.41256	0.585024	0.481717	0.722919	1.35276	0.534404	0.0452106
ENSMUSG00000033540	Idua	iduronidase, alpha-L [Source:MGI Symbol;Acc:MGI:96418]	99	116	83	89	201	117	112	145	0.646	0.81762	0.588598	0.629231	1.49197	0.87274	0.672794	1.07582	0.670362	1.02833	0.651893	0.012155
ENSMUSG00000089762	Ier5l	immediate early response 5-like [Source:MGI Symbol;Acc:MGI:1919750]	359	393	525	342	328	194	381	279	7.27657	8.60437	11.5647	7.51069	7.5626	4.49505	7.10921	6.42998	8.73908	6.39921	1.36565	0.0433077
ENSMUSG00000038271	Iffo1	intermediate filament family orphan 1 [Source:MGI Symbol;Acc:MGI:2444516]	845	600	810	738	562	459	588	654	4.28662	3.28779	4.46566	4.05635	3.24309	2.66177	2.74599	3.77232	4.0241	3.10579	1.29568	0.0336687
ENSMUSG00000026536	Ifi211	interferon activated gene 211 [Source:MGI Symbol;Acc:MGI:3041120]	0	3	1	1	3	7	6	3	0	0.0987257	0.0331056	0.0330246	0.103969	0.243776	0.168288	0.103937	0.041214	0.154992	0.265909	0.0214608
ENSMUSG00000048583	Igf2	insulin-like growth factor 2 [Source:MGI Symbol;Acc:MGI:96434]	458	266	1466	363	432	292	303	323	1.89348	1.18788	6.58676	1.62601	2.03162	1.37999	1.15319	1.51835	2.82353	1.52079	1.85662	0.0304016
ENSMUSG00000033581	Igf2bp2	insulin-like growth factor 2 mRNA binding protein 2 [Source:MGI Symbol;Acc:MGI:1890358]	5	4	4	4	9	10	8	7	0.0193403	0.0167117	0.0168118	0.0167622	0.0395986	0.0442145	0.0284857	0.0307848	0.0174065	0.0357709	0.486611	0.0465891
ENSMUSG00000017493	Igfbp4	insulin-like growth factor binding protein 4 [Source:MGI Symbol;Acc:MGI:96439]	1791	2132	1063	893	2306	2193	2171	2072	15.9433	20.5005	10.2839	8.61302	23.3511	22.3162	17.7913	20.9723	13.8352	21.1077	0.655457	0.00376718
ENSMUSG00000036256	Igfbp7	insulin-like growth factor binding protein 7 [Source:MGI Symbol;Acc:MGI:1352480]	602	448	597	564	890	878	625	458	16.6859	13.413	17.9834	16.9377	28.0613	27.8194	15.9477	14.4342	16.255	21.5657	0.753744	0.0344991
ENSMUSG00000104213	Ighd	immunoglobulin heavy constant delta [Source:MGI Symbol;Acc:MGI:96447]	7	12	6	8	2	2	2	5	0.20036	0.371001	0.186643	0.248081	0.0651285	0.065444	0.052692	0.16271	0.251521	0.0864937	2.90797	0.0115149
ENSMUSG00000035004	Igsf6	immunoglobulin superfamily, member 6 [Source:MGI Symbol;Acc:MGI:1891393]	6	13	3	23	16	39	19	22	0.150013	0.3511	0.0815083	0.623067	0.455066	1.11469	0.43734	0.625446	0.301422	0.658136	0.457994	0.0294416
ENSMUSG00000038034	Igsf8	immunoglobulin superfamily, member 8 [Source:MGI Symbol;Acc:MGI:2154090]	3803	3151	3859	3069	2363	1722	3359	2721	29.0346	25.9856	32.019	25.3868	20.5219	15.0287	23.6083	23.6206	28.1065	20.6949	1.35814	0.0111244
ENSMUSG00000031712	Il15	interleukin 15 [Source:MGI Symbol;Acc:MGI:103014]	16	7	9	14	22	21	15	18	0.18883	0.0892345	0.11543	0.179021	0.295343	0.283308	0.162963	0.241545	0.143129	0.24579	0.582322	0.0465353
ENSMUSG00000015966	Il17rb	interleukin 17 receptor B [Source:MGI Symbol;Acc:MGI:1355292]	12	10	16	20	8	4	4	1	0.0778612	0.0700892	0.112829	0.140609	0.059052	0.0296727	0.0238909	0.00737887	0.100347	0.0299986	3.34505	0.00140374
ENSMUSG00000040717	Il17rd	interleukin 17 receptor D [Source:MGI Symbol;Acc:MGI:2159727]	173	112	99	164	17	108	28	86	0.665865	0.465644	0.414112	0.68392	0.0744292	0.475188	0.0992112	0.376367	0.557385	0.256299	2.17475	0.0170549
ENSMUSG00000031304	Il2rg	interleukin 2 receptor, gamma chain [Source:MGI Symbol;Acc:MGI:96551]	17	20	9	12	40	49	16	22	0.254467	0.323379	0.146409	0.194613	0.681104	0.838455	0.220484	0.374441	0.229717	0.528621	0.434559	0.0061943
ENSMUSG00000032737	Inppl1	inositol polyphosphate phosphatase-like 1 [Source:MGI Symbol;Acc:MGI:1333787]	434	408	368	450	292	304	334	264	2.1103	2.14294	1.94467	2.37077	1.61511	1.68977	1.49509	1.4596	2.14217	1.56489	1.36889	0.00661725
ENSMUSG00000048782	Insc	INSC spindle orientation adaptor protein [Source:MGI Symbol;Acc:MGI:1917942]	97	75	82	66	33	38	34	58	0.897567	0.74964	0.824618	0.661706	0.347361	0.401953	0.289629	0.610236	0.783383	0.412295	1.90005	0.00111879
ENSMUSG00000046192	Iqub	IQ motif and ubiquitin domain containing [Source:MGI Symbol;Acc:MGI:3041159]	27	20	48	28	15	18	19	11	0.402172	0.321785	0.777008	0.451875	0.254157	0.306483	0.260535	0.186289	0.48821	0.251866	1.93837	0.0143847
ENSMUSG00000020227	Irak3	interleukin-1 receptor-associated kinase 3 [Source:MGI Symbol;Acc:MGI:1921164]	20	13	11	8	36	30	27	22	0.155023	0.108843	0.0926582	0.0671826	0.317421	0.265816	0.192663	0.193892	0.105927	0.242448	0.436905	0.000759886
ENSMUSG00000055980	Irs1	insulin receptor substrate 1 [Source:MGI Symbol;Acc:MGI:99454]	363	308	299	342	129	222	332	251	2.15885	1.97862	1.93255	2.20376	0.872715	1.50928	1.81769	1.69732	2.06844	1.47425	1.40305	0.0397087
ENSMUSG00000020758	Itgb4	integrin beta 4 [Source:MGI Symbol;Acc:MGI:96613]	213	154	241	186	110	116	115	106	1.24204	0.970001	1.52728	1.17514	0.729648	0.773241	0.617335	0.702805	1.22862	0.705757	1.74085	0.000194553
ENSMUSG00000052684	Jun	jun proto-oncogene [Source:MGI Symbol;Acc:MGI:96646]	2119	1991	2657	2350	1679	1403	1898	1861	36.1351	36.6745	49.2417	43.4197	32.5697	27.3499	29.796	36.0842	41.3678	31.45	1.31535	0.0128294
ENSMUSG00000001552	Jup	junction plakoglobin [Source:MGI Symbol;Acc:MGI:96650]	627	511	606	523	395	410	512	404	3.64834	3.21175	3.83215	3.29723	2.6145	2.72716	2.74259	2.67289	3.49737	2.68928	1.30048	0.0160723
ENSMUSG00000027425	Kat14	lysine acetyltransferase 14 [Source:MGI Symbol;Acc:MGI:1917264]	518	565	476	349	337	277	364	416	3.33212	3.92585	3.32767	2.43241	2.46595	2.0369	2.15554	3.04269	3.25451	2.42527	1.34192	0.0353018
ENSMUSG00000040606	Kazn	kazrin, periplakin interacting protein [Source:MGI Symbol;Acc:MGI:1918779]	858	687	645	628	617	433	513	574	2.5833	2.23428	2.11052	2.04865	2.11318	1.4903	1.4219	1.96504	2.24419	1.74761	1.28415	0.0459076
ENSMUSG00000054978	Kbtbd13	kelch repeat and BTB (POZ) domain containing 13 [Source:MGI Symbol;Acc:MGI:1921742]	6	1	3	5	11	11	5	10	0.109895	0.019785	0.0597105	0.0992339	0.229202	0.230323	0.0843084	0.208272	0.072156	0.188026	0.383755	0.0212123
ENSMUSG00000086900	Kcnab3os	potassium voltage-gated channel, shaker-related subfamily, beta member 3, opposite strand [Source:MGI Symbol;Acc:MGI:3801910]	2	2	2	1	6	0	6	11	0.192154	0.207568	0.208811	0.10415	0.655779	0	0.530731	1.20166	0.178171	0.597043	0.298422	0.0475138
ENSMUSG00000074575	Kcng1	potassium voltage-gated channel, subfamily G, member 1 [Source:MGI Symbol;Acc:MGI:3616086]	929	657	864	720	362	347	733	486	7.28908	5.56822	7.36739	6.12084	3.23095	3.11233	5.2945	4.33577	6.58638	3.99339	1.64932	0.000280007
ENSMUSG00000020155	Kcnmb1	potassium large conductance calcium-activated channel, subfamily M, beta member 1 [Source:MGI Symbol;Acc:MGI:1334203]	20	9	22	27	11	4	13	5	0.259519	0.126146	0.310246	0.379601	0.162372	0.0593384	0.15529	0.0737651	0.268878	0.112691	2.38597	0.0106259
ENSMUSG00000018476	Kdm6b	KDM1 lysine (K)-specific demethylase 6B [Source:MGI Symbol;Acc:MGI:2448492]	573	468	515	551	421	384	431	338	4.28621	3.78145	4.18667	4.46571	3.58232	3.2836	2.96797	2.87481	4.18001	3.17717	1.31564	0.0146799
ENSMUSG00000063576	Klhdc3	kelch domain containing 3 [Source:MGI Symbol;Acc:MGI:2651568]	3456	3089	3063	2951	2451	2049	2906	2518	49.6941	47.9782	47.8654	45.975	40.0903	33.6801	38.4672	41.168	47.8782	38.3514	1.24841	0.0240834
ENSMUSG00000029312	Klhl8	kelch-like 8 [Source:MGI Symbol;Acc:MGI:2179430]	672	646	676	537	367	498	631	395	5.76139	5.98253	6.29865	4.98831	3.57922	4.88076	4.98025	3.8506	5.75772	4.32271	1.33197	0.0206754
ENSMUSG00000030980	Knop1	lysine rich nucleolar protein 1 [Source:MGI Symbol;Acc:MGI:1913606]	213	203	296	218	390	292	471	323	0.74553	0.767496	1.12595	0.826731	1.5528	1.16834	1.51765	1.28547	0.866427	1.38106	0.627363	0.000119001
ENSMUSG00000054146	Krt15	keratin 15 [Source:MGI Symbol;Acc:MGI:96689]	11	3	8	10	0	0	0	0	0.284722	0.0838769	0.22504	0.280434	0	0	0	0	0.218518	0	Inf	2.57e-07
ENSMUSG00000020911	Krt19	keratin 19 [Source:MGI Symbol;Acc:MGI:96693]	0	0	1	0	4	5	3	0	0	0	0.0253186	0	0.10601	0.133187	0.0643517	0	0.00632964	0.0758871	0.0834086	0.0167059
ENSMUSG00000035831	Krt25	keratin 25 [Source:MGI Symbol;Acc:MGI:1918060]	2	7	0	0	0	0	0	0	0.0546803	0.206733	0	0	0	0	0	0	0.0653534	0	Inf	0.0438411
ENSMUSG00000028062	Lamtor2	late endosomal/lysosomal adaptor, MAPK and MTOR activator 2 [Source:MGI Symbol;Acc:MGI:1932697]	596	540	595	501	452	322	510	302	14.1104	13.8096	15.3092	12.8514	12.1729	8.71461	11.1154	8.12966	14.0201	10.0332	1.39738	0.00728576
ENSMUSG00000021959	Lats2	large tumor suppressor 2 [Source:MGI Symbol;Acc:MGI:1354386]	1563	708	1187	941	1433	1406	1535	1347	8.58832	4.20221	7.08831	5.60222	8.95695	8.8315	7.76465	8.41569	6.37026	8.4922	0.750132	0.015022
ENSMUSG00000026822	Lcn2	lipocalin 2 [Source:MGI Symbol;Acc:MGI:96757]	16	29	39	338	639	1006	124	17	0.178781	0.350013	0.473588	4.09194	8.12189	12.8496	1.27549	0.215984	1.27358	5.61574	0.226788	0.0199691
ENSMUSG00000094035	Ldlrad2	low density lipoprotein receptor class A domain containing 2 [Source:MGI Symbol;Acc:MGI:3588210]	6	0	5	3	2	0	0	0	0.116694	0	0.105697	0.0632286	0.0442575	0	0	0	0.071405	0.0110644	6.45359	0.0304316
ENSMUSG00000051067	Lingo3	leucine rich repeat and Ig domain containing 3 [Source:MGI Symbol;Acc:MGI:3609246]	768	977	1083	888	1436	1033	1425	926	11.2575	15.4692	17.2524	14.103	23.9441	17.3093	19.229	15.4335	14.5205	18.979	0.765086	0.0102651
ENSMUSG00000016239	Lonrf3	LON peptidase N-terminal domain and ring finger 3 [Source:MGI Symbol;Acc:MGI:1921615]	136	138	85	134	146	178	171	153	1.69165	1.85415	1.14904	1.80592	2.06581	2.531	1.95809	2.1639	1.62519	2.1797	0.745603	0.0329238
ENSMUSG00000043165	Lor	loricrin [Source:MGI Symbol;Acc:MGI:96816]	311	195	360	242	219	162	163	204	9.50686	6.43881	11.9598	8.0152	7.61526	5.66099	4.587	7.09055	8.98016	6.23845	1.43949	0.030968
ENSMUSG00000032818	Loxhd1	lipoxygenase homology domains 1 [Source:MGI Symbol;Acc:MGI:1914609]	0	0	0	0	0	3	2	4	0	0	0	0	0	0.0181153	0.00972367	0.0240198	0	0.0129647	0	0.0131147
ENSMUSG00000038668	Lpar1	lysophosphatidic acid receptor 1 [Source:MGI Symbol;Acc:MGI:108429]	468	322	386	328	298	275	262	288	4.94379	3.67421	4.43144	3.75413	3.58093	3.32083	2.54789	3.45923	4.20089	3.22722	1.30171	0.048171
ENSMUSG00000037095	Lrg1	leucine-rich alpha-2-glycoprotein 1 [Source:MGI Symbol;Acc:MGI:1924155]	28	37	31	14	238	108	69	19	1.08145	1.54364	1.30124	0.585886	10.4567	4.76842	2.45336	0.834388	1.12805	4.6282	0.243735	0.000224919
ENSMUSG00000030263	Lrmp	lymphoid-restricted membrane protein [Source:MGI Symbol;Acc:MGI:108424]	13	21	34	18	28	44	44	22	0.108546	0.189402	0.308525	0.162844	0.265947	0.419977	0.338212	0.208866	0.192329	0.30825	0.623939	0.0470886
ENSMUSG00000031637	Lrp2bp	Lrp2 binding protein [Source:MGI Symbol;Acc:MGI:1914870]	4	3	2	4	10	4	9	8	0.026546	0.0215066	0.0144236	0.0287621	0.075494	0.0303499	0.0549903	0.0603706	0.0228096	0.0553012	0.412461	0.0319783
ENSMUSG00000087200	Lrp8os3	low density lipoprotein receptor-related protein 8, apolipoprotein e receptor, opposite strand 3 [Source:MGI Symbol;Acc:MGI:3651133]	6	14	8	7	18	19	15	20	0.184337	0.464624	0.267124	0.23303	0.629103	0.667311	0.424257	0.698678	0.287279	0.604837	0.474969	0.00706087
ENSMUSG00000030125	Lrrc23	leucine rich repeat containing 23 [Source:MGI Symbol;Acc:MGI:1315192]	43	21	49	33	33	13	8	8	0.81364	0.42922	1.00764	0.676556	0.710313	0.281201	0.139356	0.172121	0.731763	0.325748	2.24641	0.0165775
ENSMUSG00000030556	Lrrc28	leucine rich repeat containing 28 [Source:MGI Symbol;Acc:MGI:1915689]	329	239	386	315	381	374	453	403	1.4295	1.12171	1.82271	1.48292	1.88312	1.85763	1.81196	1.99097	1.46421	1.88592	0.77639	0.0160197
ENSMUSG00000054320	Lrrc36	leucine rich repeat containing 36 [Source:MGI Symbol;Acc:MGI:2448585]	5	0	18	12	0	0	2	0	0.067643	0	0.264628	0.175878	0	0	0.0249042	0	0.127037	0.00622605	20.4042	0.000899243
ENSMUSG00000022759	Lrrc74b	leucine rich repeat containing 74B [Source:MGI Symbol;Acc:MGI:1921935]	19	6	15	22	8	4	1	1	0.239176	0.0815858	0.205214	0.300065	0.114564	0.0575665	0.011593	0.0143153	0.20651	0.0495096	4.17111	0.00106422
ENSMUSG00000024402	Lta	lymphotoxin A [Source:MGI Symbol;Acc:MGI:104797]	1	0	1	3	16	1	4	4	0.0393396	0	0.0427285	0.127829	0.715668	0.0449543	0.144779	0.17882	0.0524742	0.271055	0.193592	0.0165433
ENSMUSG00000002020	Ltbp2	latent transforming growth factor beta binding protein 2 [Source:MGI Symbol;Acc:MGI:99502]	1	1	0	3	6	6	5	4	0.00399608	0.00431449	0	0.0129847	0.0272619	0.027394	0.018385	0.0181643	0.00532383	0.0228013	0.233488	0.00847115
ENSMUSG00000075602	Ly6a	lymphocyte antigen 6 complex, locus A [Source:MGI Symbol;Acc:MGI:107527]	563	496	571	469	875	780	540	501	8.86932	8.4403	9.77599	8.00527	15.6803	14.0468	7.8314	8.97414	8.77272	11.6332	0.754114	0.0270546
ENSMUSG00000079018	Ly6c1	lymphocyte antigen 6 complex, locus C1 [Source:MGI Symbol;Acc:MGI:96882]	573	482	677	549	1039	753	795	599	9.46272	8.5981	12.1505	9.82323	19.5183	14.2153	12.0863	11.2476	10.0086	14.2669	0.701529	0.00232565
ENSMUSG00000044678	Ly6k	lymphocyte antigen 6 complex, locus K [Source:MGI Symbol;Acc:MGI:1923736]	0	2	0	0	3	7	6	2	0	0.129673	0	0	0.20484	0.480288	0.33156	0.136517	0.0324182	0.288301	0.112446	0.00294416
ENSMUSG00000022805	Maats1	MYCBP-associated, testis expressed 1 [Source:MGI Symbol;Acc:MGI:2443598]	40	7	40	37	17	16	9	9	0.464508	0.0878053	0.504814	0.465535	0.224559	0.212391	0.0962183	0.118838	0.380666	0.163001	2.33535	0.0157333
ENSMUSG00000056947	Mab21l1	mab-21-like 1 [Source:MGI Symbol;Acc:MGI:1333773]	52	48	27	55	17	15	57	13	1.13477	1.13146	0.640332	1.30044	0.421994	0.374203	1.1451	0.322563	1.05175	0.565965	1.85833	0.0441286
ENSMUSG00000042622	Maff	v-maf musculoaponeurotic fibrosarcoma oncogene family, protein F (avian) [Source:MGI Symbol;Acc:MGI:96910]	43	25	60	40	123	56	85	71	0.518148	0.325403	0.785739	0.522244	1.686	0.771396	0.942909	0.972786	0.537883	1.09327	0.491993	0.00101106
ENSMUSG00000018143	Mafk	v-maf musculoaponeurotic fibrosarcoma oncogene family, protein K (avian) [Source:MGI Symbol;Acc:MGI:99951]	306	269	311	257	407	359	355	323	2.59728	2.46629	2.86881	2.36349	3.92968	3.48331	2.7739	3.11727	2.57397	3.32604	0.773884	0.0141545
ENSMUSG00000036634	Mag	myelin-associated glycoprotein [Source:MGI Symbol;Acc:MGI:96912]	2256	1894	2334	1940	1623	1328	1446	1502	18.837	17.0823	21.1795	17.5507	15.4154	12.6756	11.1149	14.2598	18.6624	13.3664	1.39621	0.00145236
ENSMUSG00000027377	Mall	mal, T cell differentiation protein-like [Source:MGI Symbol;Acc:MGI:2385152]	11	22	18	26	46	35	34	14	0.298206	0.644227	0.530312	0.763688	1.41856	1.08466	0.848529	0.43154	0.559108	0.945821	0.591135	0.0496799
ENSMUSG00000031812	Map1lc3b	microtubule-associated protein 1 light chain 3 beta [Source:MGI Symbol;Acc:MGI:1914693]	1064	926	1053	934	3291	948	1100	959	5.47212	5.14422	5.88552	5.20453	19.2533	5.57341	5.20799	5.60796	5.4266	8.91068	0.608999	0.0211303
ENSMUSG00000004054	Map3k11	mitogen-activated protein kinase kinase kinase 11 [Source:MGI Symbol;Acc:MGI:1346880]	579	551	579	548	382	391	342	333	4.79473	4.92869	5.21083	4.91686	3.59844	3.70137	2.60721	3.13547	4.96278	3.26062	1.52203	0.000176267
ENSMUSG00000028862	Map3k6	mitogen-activated protein kinase kinase kinase 6 [Source:MGI Symbol;Acc:MGI:1855691]	149	97	129	145	263	195	216	110	1.41115	0.992329	1.32777	1.48791	2.83342	2.11118	1.88325	1.18456	1.30479	2.0031	0.651386	0.0110543
ENSMUSG00000046709	Mapk10	mitogen-activated protein kinase 10 [Source:MGI Symbol;Acc:MGI:1346863]	5005	4821	3988	4793	6145	6887	5797	4420	13.6513	14.2037	11.8214	14.1645	19.0659	21.4734	14.5559	13.7078	13.4602	17.2007	0.782538	0.0116644
ENSMUSG00000063704	Mapk15	mitogen-activated protein kinase 15 [Source:MGI Symbol;Acc:MGI:2652894]	15	5	15	12	9	4	3	0	0.204698	0.0737036	0.222465	0.177423	0.139713	0.0624058	0.0376905	0	0.169572	0.0599523	2.82845	0.0229948
ENSMUSG00000001034	Mapk7	mitogen-activated protein kinase 7 [Source:MGI Symbol;Acc:MGI:1346347]	308	284	319	219	181	179	178	199	1.1964	1.19162	1.34666	0.9217	0.799774	0.794836	0.636514	0.878925	1.16409	0.777512	1.4972	0.00381344
ENSMUSG00000047945	Marcksl1	MARCKS-like 1 [Source:MGI Symbol;Acc:MGI:97143]	1514	1370	1808	1349	1101	974	1294	1227	51.2984	50.141	66.5762	49.5235	42.4355	37.7256	40.3623	47.2711	54.3848	41.9486	1.29646	0.0174531
ENSMUSG00000037236	Matr3	matrin 3 [Source:MGI Symbol;Acc:MGI:1298379]	5847	6343	6125	5617	4100	5768	4810	4024	18.6821	21.8919	21.2688	19.4455	14.9019	21.0678	14.1482	14.6192	20.3221	16.1843	1.25567	0.0474669
ENSMUSG00000058298	Mcm9	minichromosome maintenance 9 homologous recombination repair factor [Source:MGI Symbol;Acc:MGI:1918817]	62	121	98	92	164	122	160	99	0.229832	0.48451	0.394812	0.369516	0.691563	0.516988	0.546017	0.417282	0.369668	0.542962	0.680834	0.0204475
ENSMUSG00000032776	Mctp2	multiple C2 domains, transmembrane 2 [Source:MGI Symbol;Acc:MGI:2685335]	25	30	14	29	23	41	54	43	0.100101	0.129749	0.0609212	0.12581	0.104755	0.18766	0.199042	0.195763	0.104145	0.171805	0.606183	0.0241402
ENSMUSG00000092558	Med20	mediator complex subunit 20 [Source:MGI Symbol;Acc:MGI:1929648]	323	326	458	342	237	233	306	296	1.71001	1.86427	2.63515	1.96176	1.42728	1.41011	1.49136	1.78181	2.0428	1.52764	1.33722	0.0342284
ENSMUSG00000020397	Med7	mediator complex subunit 7 [Source:MGI Symbol;Acc:MGI:1913463]	332	270	312	303	186	211	203	274	2.52196	2.21543	2.57572	2.49382	1.60723	1.83224	1.41959	2.36659	2.45173	1.80641	1.35724	0.0315203
ENSMUSG00000040113	Mettl11b	methyltransferase like 11B [Source:MGI Symbol;Acc:MGI:2685053]	15	17	12	16	17	25	33	21	0.354815	0.434367	0.308475	0.410077	0.45742	0.67602	0.718602	0.564812	0.376933	0.604214	0.623841	0.037575
ENSMUSG00000010554	Mettl16	methyltransferase like 16 [Source:MGI Symbol;Acc:MGI:1914743]	535	546	550	580	356	348	540	474	1.90171	2.09641	2.12469	2.23377	1.43948	1.41406	1.76704	1.91576	2.08915	1.63409	1.27848	0.042992
ENSMUSG00000030605	Mfge8	milk fat globule-EGF factor 8 protein [Source:MGI Symbol;Acc:MGI:102768]	2796	1829	2494	1990	1202	1822	2125	1750	19.0017	13.4265	18.4202	14.6531	9.29231	14.1548	13.2947	13.5228	16.3753	12.5661	1.30313	0.0393269
ENSMUSG00000028655	Mfsd2a	major facilitator superfamily domain containing 2A [Source:MGI Symbol;Acc:MGI:1923824]	496	307	437	392	540	566	621	480	10.031	6.70648	9.60475	8.58954	12.4228	13.0851	11.5616	11.0376	8.73294	12.0268	0.726123	0.00187103
ENSMUSG00000019888	Mgat4c	MGAT4 family, member C [Source:MGI Symbol;Acc:MGI:1914819]	90	73	24	86	107	130	83	133	0.265638	0.232735	0.0769839	0.275019	0.359246	0.438621	0.225521	0.446345	0.212594	0.367433	0.578592	0.0189697
ENSMUSG00000097767	Miat	myocardial infarction associated transcript (non-protein coding) [Source:MGI Symbol;Acc:MGI:2444886]	1528	2404	1315	1309	2783	2011	2431	1748	4.56567	7.75909	4.27022	4.23782	9.45931	6.869	6.68699	5.93876	5.2082	7.23851	0.719512	0.011338
ENSMUSG00000074415	Mir100hg	Mir100 Mirlet7a-2 Mir125b-1 cluster host gene [Source:MGI Symbol;Acc:MGI:1920394]	245	183	267	226	110	164	144	141	0.214321	0.17292	0.253836	0.214205	0.10946	0.164	0.115965	0.140247	0.213821	0.132418	1.61474	0.00156396
ENSMUSG00000065590	Mir212	microRNA 212 [Source:MGI Symbol;Acc:MGI:2676888]	4	2	4	2	7	6	9	6	2.39031	1.29103	2.59752	1.29493	4.75837	4.09856	4.95154	4.07683	1.89345	4.47133	0.423464	0.0388758
ENSMUSG00000097636	Mirt1	myocardial infarction associated transcript 1 [Source:MGI Symbol;Acc:MGI:1922001]	38	75	35	52	46	64	91	99	0.193007	0.411472	0.193193	0.28616	0.265772	0.371591	0.425492	0.571731	0.270958	0.408646	0.663063	0.047587
ENSMUSG00000048416	Mlf1	myeloid leukemia factor 1 [Source:MGI Symbol;Acc:MGI:1341819]	17	23	29	23	10	17	5	10	0.366566	0.53571	0.679602	0.53734	0.245281	0.419031	0.0992512	0.245187	0.529804	0.252187	2.10084	0.0133231
ENSMUSG00000012519	Mlkl	mixed lineage kinase domain-like [Source:MGI Symbol;Acc:MGI:1921818]	1	1	2	4	3	15	5	5	0.0158666	0.0171309	0.0344669	0.0687304	0.0541223	0.27195	0.0729984	0.0901574	0.0340487	0.122307	0.278387	0.0171212
ENSMUSG00000026303	Mlph	melanophilin [Source:MGI Symbol;Acc:MGI:2176380]	63	74	54	78	134	106	103	84	0.571198	0.724724	0.53209	0.766234	1.38202	1.09863	0.8597	0.865957	0.648562	1.05158	0.616751	0.00272479
ENSMUSG00000000901	Mmp11	matrix metallopeptidase 11 [Source:MGI Symbol;Acc:MGI:97008]	23	39	41	20	21	13	14	12	0.288525	0.528473	0.558971	0.271844	0.299677	0.186429	0.161684	0.171161	0.411953	0.204738	2.0121	0.0107852
ENSMUSG00000031790	Mmp15	matrix metallopeptidase 15 [Source:MGI Symbol;Acc:MGI:109320]	337	245	448	299	201	216	259	206	3.29556	2.58798	4.76125	3.16805	2.23595	2.41465	2.33165	2.29056	3.45321	2.3182	1.48961	0.00697867
ENSMUSG00000041445	Mmrn2	multimerin 2 [Source:MGI Symbol;Acc:MGI:2385618]	108	69	69	59	126	101	101	96	1.42174	0.981163	0.987171	0.841535	1.88684	1.51991	1.224	1.43695	1.0579	1.51693	0.697399	0.0246822
ENSMUSG00000048965	Mrgpre	MAS-related GPR, member E [Source:MGI Symbol;Acc:MGI:2441884]	242	167	185	234	131	157	173	146	3.49917	2.60832	2.90713	3.66595	2.15469	2.59507	2.30282	2.40036	3.17014	2.36323	1.34144	0.0465243
ENSMUSG00000002767	Mrpl2	mitochondrial ribosomal protein L2 [Source:MGI Symbol;Acc:MGI:1351622]	378	342	381	295	324	380	504	525	7.5519	7.38049	8.27241	6.38569	7.36333	8.67856	9.26956	11.9261	7.39762	9.30938	0.794642	0.0349298
ENSMUSG00000054312	Mrps21	mitochondrial ribosomal protein S21 [Source:MGI Symbol;Acc:MGI:1913542]	211	214	581	134	297	512	595	547	7.20763	7.89619	21.5689	4.95946	11.5407	19.9931	18.7107	21.2457	10.4081	17.8725	0.582349	0.0164421
ENSMUSG00000024679	Ms4a6d	membrane-spanning 4-domains, subfamily A, member 6D [Source:MGI Symbol;Acc:MGI:1916024]	19	15	22	28	44	51	31	22	0.444978	0.379469	0.559966	0.710507	1.17221	1.3654	0.668369	0.58585	0.52373	0.947957	0.552482	0.0138732
ENSMUSG00000007035	Msh5	mutS homolog 5 [Source:MGI Symbol;Acc:MGI:1329021]	8	3	12	7	2	3	0	2	0.0486672	0.0197142	0.0793359	0.0461421	0.0138432	0.0208653	0	0.0138365	0.0484648	0.0121363	3.99339	0.00863074
ENSMUSG00000048450	Msx1	msh homeobox 1 [Source:MGI Symbol;Acc:MGI:97168]	83	92	250	86	118	39	43	67	1.18314	1.41658	3.87294	1.32824	1.9134	0.635505	0.56427	1.08594	1.95022	1.04978	1.85775	0.0440342
ENSMUSG00000031765	Mt1	metallothionein 1 [Source:MGI Symbol;Acc:MGI:97171]	6082	4698	6866	4498	9509	7672	7073	5855	145.897	121.733	178.998	116.907	259.478	210.382	156.196	159.699	140.884	196.439	0.71719	0.00365922
ENSMUSG00000031762	Mt2	metallothionein 2 [Source:MGI Symbol;Acc:MGI:97172]	2511	2045	3124	2057	3860	3714	3429	2881	163.929	144.21	221.647	145.5	286.655	277.172	206.082	213.857	168.821	245.942	0.686429	0.000400528
ENSMUSG00000064357	mt-Atp6	mitochondrially encoded ATP synthase 6 [Source:MGI Symbol;Acc:MGI:99927]	75634	18767	18166	64486	17182	20464	21963	20016	6039.8	1618.81	1576.55	5579.46	1560.79	1868.08	1614.59	1817.42	3703.66	1715.22	2.15929	0.0019349
ENSMUSG00000064356	mt-Atp8	mitochondrially encoded ATP synthase 8 [Source:MGI Symbol;Acc:MGI:99926]	7942	8426	6073	7240	10173	11308	12672	10073	2117.15	2426.27	1759.42	2091.14	3084.87	3445.94	3109.8	3053.2	2098.49	3173.45	0.661266	2.37e-06
ENSMUSG00000052105	Mtcl1	microtubule crosslinking factor 1 [Source:MGI Symbol;Acc:MGI:1915867]	641	599	618	673	423	478	614	398	2.48973	2.51313	2.60871	2.83224	1.86895	2.12237	2.19546	1.75772	2.61095	1.98613	1.31459	0.0143122
ENSMUSG00000022255	Mtdh	metadherin [Source:MGI Symbol;Acc:MGI:1914404]	671	670	544	632	1308	620	779	635	1.79224	1.93305	1.57913	1.829	3.97418	1.89307	1.91548	1.92851	1.78336	2.42781	0.734554	0.0269691
ENSMUSG00000029376	Mthfd2l	methylenetetrahydrofolate dehydrogenase (NADP+ dependent) 2-like [Source:MGI Symbol;Acc:MGI:1915871]	170	189	112	158	101	104	161	67	1.2801	1.53727	0.916551	1.28906	0.865126	0.895216	1.11606	0.573647	1.25575	0.862511	1.45592	0.0462394
ENSMUSG00000064341	mt-Nd1	mitochondrially encoded NADH dehydrogenase 1 [Source:MGI Symbol;Acc:MGI:101787]	107004	97892	84215	87511	112057	120583	135646	110388	6080.52	6008.73	5200.84	5387.96	7243.43	7832.97	7095.97	7132.4	5669.51	7326.2	0.773869	0.000927133
ENSMUSG00000065947	mt-Nd4l	mitochondrially encoded NADH dehydrogenase 4L [Source:MGI Symbol;Acc:MGI:102497]	13316	11480	6259	11134	12259	13631	16313	12807	2438.2	2270.56	1245.5	2208.86	2553.38	2853.14	2749.76	2666.35	2040.78	2705.66	0.754265	0.014317
ENSMUSG00000033763	Mtss2	MTSS I-BAR domain containing 2 [Source:MGI Symbol;Acc:MGI:3039591]	4349	2321	3585	2749	2123	2279	2827	2298	29.3359	16.9114	26.281	20.0912	16.2901	17.5733	17.555	17.6252	23.1549	17.2609	1.34146	0.0192549
ENSMUSG00000064347	mt-Ta	mitochondrially encoded tRNA alanine [Source:MGI Symbol;Acc:MGI:102491]	202	246	185	186	281	360	447	283	159.204	209.427	158.459	158.832	251.927	324.344	324.321	253.608	171.481	288.55	0.594284	2.18e-05
ENSMUSG00000064349	mt-Tc	mitochondrially encoded tRNA cysteine [Source:MGI Symbol;Acc:MGI:102490]	793	828	701	678	750	984	1218	892	653.404	736.943	627.725	605.285	702.967	926.838	923.89	835.693	655.839	847.347	0.773992	0.00498127
ENSMUSG00000064353	mt-Td	mitochondrially encoded tRNA aspartic acid [Source:MGI Symbol;Acc:MGI:102489]	18	19	22	15	26	28	38	22	13.9841	15.9442	18.5749	12.626	22.9767	24.8661	27.1768	19.4335	15.2823	23.6133	0.64719	0.0342385
ENSMUSG00000064336	mt-Tf	mitochondrially encoded tRNA phenylalanine [Source:MGI Symbol;Acc:MGI:102487]	6	11	12	9	23	20	30	15	4.79819	9.50235	10.4292	7.79856	20.9232	18.284	22.0863	13.6399	8.13207	18.7334	0.434096	0.0010952
ENSMUSG00000064359	mt-Tg	mitochondrially encoded tRNA glycine [Source:MGI Symbol;Acc:MGI:102486]	78	81	70	65	83	100	139	97	62.3789	69.9718	60.8396	56.322	75.5072	91.4209	102.334	88.2044	62.3781	89.3667	0.698001	0.00962431
ENSMUSG00000064355	mt-Tk	mitochondrially encoded tRNA lysine [Source:MGI Symbol;Acc:MGI:102483]	20	31	20	28	44	43	57	38	16.733	28.0153	18.1845	25.3815	41.875	41.1252	43.9014	36.1492	22.0786	40.7627	0.541636	0.00116353
ENSMUSG00000064340	mt-Tl1	mitochondrially encoded tRNA leucine 1 [Source:MGI Symbol;Acc:MGI:102482]	443	517	349	416	535	763	908	633	321.214	404.927	275.018	326.818	441.276	632.435	606.096	521.877	331.994	550.421	0.603164	6.55e-06
ENSMUSG00000064348	mt-Tn	mitochondrially encoded tRNA asparagine [Source:MGI Symbol;Acc:MGI:102479]	653	711	561	567	669	901	1114	778	500.159	588.246	466.982	470.542	582.888	788.895	785.496	677.559	506.482	708.709	0.714654	0.000660075
ENSMUSG00000064372	mt-Tp	mitochondrially encoded tRNA proline [Source:MGI Symbol;Acc:MGI:102478]	81	97	80	79	128	135	172	130	65.7452	85.0441	70.5685	69.475	118.182	125.26	128.52	119.976	72.7082	122.984	0.591198	6.44e-05
ENSMUSG00000064361	mt-Tr	mitochondrially encoded tRNA arginine [Source:MGI Symbol;Acc:MGI:102476]	43	44	43	45	47	60	81	66	34.3883	38.0094	37.3724	38.9919	42.7568	54.852	59.6341	60.0152	37.1905	54.3145	0.684725	0.016408
ENSMUSG00000064371	mt-Tt	mitochondrially encoded tRNA threonine [Source:MGI Symbol;Acc:MGI:102473]	45	48	50	40	66	68	83	70	36.5248	42.0837	44.1051	35.1774	60.9376	63.0942	62.0184	64.6021	39.4727	62.6631	0.62992	0.00203646
ENSMUSG00000064338	mt-Tv	mitochondrially encoded tRNA valine [Source:MGI Symbol;Acc:MGI:102472]	14	16	15	16	22	24	34	25	11.0343	13.6213	12.8482	13.6633	19.7238	21.6232	24.6688	22.4039	12.7918	22.1049	0.578684	0.0112149
ENSMUSG00000064350	mt-Ty	mitochondrially encoded tRNA tyrosine [Source:MGI Symbol;Acc:MGI:102470]	407	453	388	362	453	552	701	511	330.349	397.165	342.257	318.352	418.255	512.173	523.793	471.598	347.031	481.455	0.720795	0.000744946
ENSMUSG00000084822	Myadml2os	myeloid-associated differentiation marker-like 2, opposite strand [Source:MGI Symbol;Acc:MGI:3650756]	2	4	0	1	0	0	0	0	0.104175	0.225064	0	0.0564644	0	0	0	0	0.096426	0	Inf	0.0402632
ENSMUSG00000019982	Myb	myeloblastosis oncogene [Source:MGI Symbol;Acc:MGI:97249]	13	0	12	10	1	2	1	1	0.0625076	0	0.0627041	0.0520948	0.00546784	0.0109941	0.00442811	0.00546793	0.0443266	0.0065895	6.72685	0.00202584
ENSMUSG00000074652	Myh7b	myosin, heavy chain 7B, cardiac muscle, beta [Source:MGI Symbol;Acc:MGI:3710243]	183	196	202	154	115	86	178	113	1.42434	1.64783	1.70866	1.29868	1.01818	0.765175	1.2754	1.00003	1.51988	1.01469	1.49787	0.0120087
ENSMUSG00000055775	Myh8	myosin, heavy polypeptide 8, skeletal muscle, perinatal [Source:MGI Symbol;Acc:MGI:1339712]	31	20	44	27	11	20	11	17	0.132671	0.0924558	0.204645	0.125199	0.0535532	0.0978447	0.0433387	0.0827257	0.138743	0.0693656	2.00017	0.0109409
ENSMUSG00000026697	Myoc	myocilin [Source:MGI Symbol;Acc:MGI:1202864]	125	96	317	50	58	62	77	80	3.2776	2.719	9.03331	1.42048	1.72997	1.85838	1.85865	2.3851	4.1126	1.95803	2.10038	0.0148845
ENSMUSG00000034744	Nagk	N-acetylglucosamine kinase [Source:MGI Symbol;Acc:MGI:1860418]	587	578	665	542	345	353	566	518	3.87216	4.11848	4.76738	3.87378	2.5888	2.66189	3.43712	3.88524	4.15795	3.14326	1.32281	0.0301186
ENSMUSG00000057103	Nat8f1	N-acetyltransferase 8 (GCN5-related) family member 1 [Source:MGI Symbol;Acc:MGI:1913366]	65	45	67	63	29	24	46	21	1.14432	0.85574	1.28189	1.2017	0.580755	0.483004	0.745512	0.420363	1.12091	0.557409	2.01094	0.000703875
ENSMUSG00000016427	Ndufa1	NADH:ubiquinone oxidoreductase subunit A1 [Source:MGI Symbol;Acc:MGI:1929511]	675	608	882	559	500	376	615	551	87.6078	85.2387	124.409	78.609	73.8199	55.7861	73.4814	81.3136	93.966	71.1003	1.3216	0.0380421
ENSMUSG00000014294	Ndufa2	NADH:ubiquinone oxidoreductase subunit A2 [Source:MGI Symbol;Acc:MGI:1343103]	1289	1047	1494	1083	897	879	1029	1027	122.549	107.522	154.366	111.559	97.0095	95.5312	90.0608	111.02	123.999	98.4053	1.26008	0.0443619
ENSMUSG00000021606	Ndufs6	NADH:ubiquinone oxidoreductase core subunit S6 [Source:MGI Symbol;Acc:MGI:107932]	616	484	688	520	382	337	404	502	17.0653	14.4835	20.714	15.6084	12.0382	10.6724	10.3033	15.8128	16.9678	12.2067	1.39004	0.012073
ENSMUSG00000092274	Neat1	nuclear paraspeckle assembly transcript 1 (non-protein coding) [Source:MGI Symbol;Acc:MGI:1914211]	941	581	779	740	294	533	405	427	2.00553	1.33755	1.80435	1.70881	0.712776	1.29858	0.79462	1.03476	1.71406	0.960184	1.78514	4.04e-05
ENSMUSG00000021365	Nedd9	neural precursor cell expressed, developmentally down-regulated gene 9 [Source:MGI Symbol;Acc:MGI:97302]	231	183	201	207	237	288	268	225	1.31652	1.12657	1.24495	1.27822	1.53648	1.87632	1.40608	1.45804	1.24156	1.56923	0.791194	0.0345709
ENSMUSG00000040195	Nemp1	nuclear envelope integral membrane protein 1 [Source:MGI Symbol;Acc:MGI:2446113]	48	29	45	65	86	90	99	49	0.270276	0.176383	0.275375	0.396552	0.550846	0.579303	0.513175	0.313713	0.279647	0.489259	0.571571	0.00447304
ENSMUSG00000004891	Nes	nestin [Source:MGI Symbol;Acc:MGI:101784]	237	211	170	208	128	181	179	158	0.976695	0.939263	0.761381	0.928741	0.600046	0.852686	0.679091	0.740355	0.90152	0.718044	1.25552	0.0373855
ENSMUSG00000003847	Nfat5	nuclear factor of activated T cells 5 [Source:MGI Symbol;Acc:MGI:1859333]	1501	944	701	512	400	528	459	712	2.05062	1.39306	1.04079	0.757871	0.621626	0.82459	0.577273	1.10601	1.31059	0.782374	1.67514	0.00750503
ENSMUSG00000038615	Nfe2l1	nuclear factor, erythroid derived 2,-like 1 [Source:MGI Symbol;Acc:MGI:99421]	1147	997	2718	1099	838	829	1124	869	4.15645	3.90255	10.7041	4.31497	3.45436	3.4341	3.74964	3.58057	5.76953	3.55467	1.62308	0.0105539
ENSMUSG00000001911	Nfix	nuclear factor I/X [Source:MGI Symbol;Acc:MGI:97311]	5717	4863	5800	5470	3986	3803	5880	3883	37.1757	34.1578	40.9885	38.5389	29.4844	28.2694	35.1991	28.7099	37.7152	30.4157	1.23999	0.0378821
ENSMUSG00000021025	Nfkbia	nuclear factor of kappa light polypeptide gene enhancer in B cells inhibitor, alpha [Source:MGI Symbol;Acc:MGI:104741]	533	433	573	599	916	865	709	525	14.6465	12.8525	17.1121	17.8342	28.633	27.1721	17.9357	16.4036	15.6114	22.5361	0.692727	0.00293485
ENSMUSG00000035356	Nfkbiz	nuclear factor of kappa light polypeptide gene enhancer in B cells inhibitor, zeta [Source:MGI Symbol;Acc:MGI:1931595]	118	116	129	138	207	213	135	125	0.872594	0.926577	1.03672	1.10568	1.74127	1.80056	0.919025	1.05102	0.985392	1.37797	0.715104	0.0344457
ENSMUSG00000023994	Nfya	nuclear transcription factor-Y alpha [Source:MGI Symbol;Acc:MGI:97316]	289	293	313	297	193	220	223	207	1.024	1.12141	1.20528	1.14019	0.777898	0.891093	0.727395	0.83396	1.12272	0.807587	1.39022	0.0075335
ENSMUSG00000020411	Nipal4	NIPA-like domain containing 4 [Source:MGI Symbol;Acc:MGI:2444671]	40	56	56	64	35	32	31	31	0.631617	0.955151	0.960994	1.09495	0.628665	0.577617	0.450625	0.556581	0.910678	0.553372	1.64569	0.0129347
ENSMUSG00000031661	Nkd1	naked cuticle 1 [Source:MGI Symbol;Acc:MGI:2135954]	261	183	194	210	119	173	146	147	1.91935	1.45365	1.55045	1.67323	0.995463	1.45432	0.9884	1.22915	1.64917	1.16683	1.41337	0.0225372
ENSMUSG00000027434	Nkx2-2	NK2 homeobox 2 [Source:MGI Symbol;Acc:MGI:97347]	65	110	86	66	10	49	20	53	0.908457	1.66065	1.30627	0.999446	0.158982	0.78286	0.257324	0.842254	1.21871	0.510355	2.38796	0.00461663
ENSMUSG00000058669	Nkx2-9	NK2 homeobox 9 [Source:MGI Symbol;Acc:MGI:1270158]	4	5	9	11	3	0	5	2	0.172087	0.232365	0.420809	0.512769	0.146824	0	0.198031	0.0978517	0.334508	0.110677	3.02238	0.0252254
ENSMUSG00000041309	Nkx6-2	NK6 homeobox 2 [Source:MGI Symbol;Acc:MGI:1352738]	324	274	357	273	182	220	201	227	5.80932	5.30671	6.95652	5.30351	3.71208	4.50923	3.31772	4.62785	5.84402	4.04172	1.44592	0.00648072
ENSMUSG00000046242	Nme9	NME/NM23 family member 9 [Source:MGI Symbol;Acc:MGI:4359686]	14	9	11	11	3	0	0	2	0.369596	0.256639	0.315578	0.314631	0.09009	0	0	0.060041	0.314111	0.0375328	8.36898	1.64e-06
ENSMUSG00000025453	Nnt	nicotinamide nucleotide transhydrogenase [Source:MGI Symbol;Acc:MGI:109279]	65	32	15	26	72	20	79	109	0.476068	0.253163	0.119397	0.206324	0.599864	0.167449	0.532654	0.907728	0.263738	0.551924	0.477853	0.0207401
ENSMUSG00000015468	Notch4	notch 4 [Source:MGI Symbol;Acc:MGI:107471]	149	65	81	126	173	185	160	113	0.664549	0.313148	0.392618	0.608883	0.877716	0.943224	0.65694	0.573049	0.4948	0.762732	0.64872	0.0168323
ENSMUSG00000047638	Nr1h4	nuclear receptor subfamily 1, group H, member 4 [Source:MGI Symbol;Acc:MGI:1352464]	1	5	2	1	0	0	0	0	0.0172064	0.0928871	0.0373773	0.0186429	0	0	0	0	0.0415284	0	Inf	0.0119546
ENSMUSG00000030551	Nr2f2	nuclear receptor subfamily 2, group F, member 2 [Source:MGI Symbol;Acc:MGI:1352452]	637	404	629	419	309	349	428	368	2.98117	2.04231	3.19919	2.12462	1.64501	1.86712	1.84397	1.95825	2.58682	1.82859	1.41466	0.00924402
ENSMUSG00000028341	Nr4a3	nuclear receptor subfamily 4, group A, member 3 [Source:MGI Symbol;Acc:MGI:1352457]	1295	1132	1280	1201	720	867	994	936	6.38596	6.02972	6.85976	6.41683	4.03881	4.88737	4.51239	5.24813	6.42307	4.67167	1.3749	0.00184525
ENSMUSG00000026751	Nr5a1	nuclear receptor subfamily 5, group A, member 1 [Source:MGI Symbol;Acc:MGI:1346833]	0	0	0	0	4	1	3	0	0	0	0	0	0.0406751	0.0102206	0.0246912	0	0	0.0188967	0	0.0246585
ENSMUSG00000025969	Nrp2	neuropilin 2 [Source:MGI Symbol;Acc:MGI:1100492]	1342	955	1102	1262	770	896	1115	829	5.25265	4.0376	4.68759	5.35188	3.42832	4.00897	4.01758	3.68938	4.83243	3.78606	1.27637	0.0290689
ENSMUSG00000049107	Ntf3	neurotrophin 3 [Source:MGI Symbol;Acc:MGI:97380]	106	116	136	120	81	52	87	72	2.88078	3.40532	4.01687	3.53353	2.50412	1.6155	2.17664	2.2249	3.45913	2.13029	1.62378	0.0033083
ENSMUSG00000063895	Nupl1	nucleoporin like 1 [Source:MGI Symbol;Acc:MGI:1919094]	10	7	3	11	13	16	21	19	0.15097	0.114157	0.0492172	0.179939	0.22326	0.276131	0.291874	0.326157	0.123571	0.279356	0.442343	0.00433662
ENSMUSG00000026211	Obsl1	obscurin-like 1 [Source:MGI Symbol;Acc:MGI:2138628]	298	259	280	243	215	136	252	154	1.08625	1.01978	1.10921	0.959711	0.891489	0.566697	0.845626	0.638274	1.04374	0.735522	1.41904	0.0175476
ENSMUSG00000047394	Odf3b	outer dense fiber of sperm tails 3B [Source:MGI Symbol;Acc:MGI:1917363]	37	18	40	26	10	14	16	7	0.414273	0.217697	0.48673	0.315412	0.127362	0.179194	0.16492	0.0891155	0.358528	0.140148	2.55821	0.00070013
ENSMUSG00000045392	Olfr1033	olfactory receptor 1033 [Source:MGI Symbol;Acc:MGI:3030867]	1	0	0	1	3	5	0	5	0.00532876	0	0	0.00577364	0.0181768	0.0304465	0	0.0302791	0.0027756	0.0197256	0.14071	0.0226947
ENSMUSG00000095706	Olfr209	olfactory receptor 209 [Source:MGI Symbol;Acc:MGI:3030043]	0	0	0	0	2	2	3	0	0	0	0	0	0.039866	0.0400591	0.0483881	0	0	0.0320783	0	0.0283981
ENSMUSG00000050121	Opalin	oligodendrocytic myelin paranodal and inner loop protein [Source:MGI Symbol;Acc:MGI:2657025]	427	417	416	339	279	283	283	333	5.07452	5.353	5.37283	4.36504	3.77169	3.84461	3.09612	4.4997	5.04135	3.80303	1.32561	0.0247742
ENSMUSG00000010311	Optc	opticin [Source:MGI Symbol;Acc:MGI:2151113]	10	4	23	17	10	2	6	3	0.103305	0.0446366	0.258232	0.190284	0.117515	0.0236215	0.0570656	0.0352445	0.149114	0.0583616	2.55501	0.0311453
ENSMUSG00000022146	Osmr	oncostatin M receptor [Source:MGI Symbol;Acc:MGI:1330819]	117	122	71	209	273	284	149	127	0.443328	0.499338	0.292377	0.858042	1.17671	1.23015	0.519744	0.547166	0.523271	0.868441	0.60254	0.0267498
ENSMUSG00000048387	Osr1	odd-skipped related transcription factor 1 [Source:MGI Symbol;Acc:MGI:1344424]	54	21	47	36	16	25	20	27	1.13646	0.477391	1.07499	0.820878	0.383037	0.601459	0.387479	0.646089	0.877428	0.504516	1.73915	0.0316524
ENSMUSG00000024725	Ostf1	osteoclast stimulating factor 1 [Source:MGI Symbol;Acc:MGI:700012]	230	281	272	267	395	331	361	329	1.89454	2.50022	2.43495	2.38292	3.70117	3.11677	2.73747	3.08139	2.30316	3.1592	0.729032	0.00314075
ENSMUSG00000027765	P2ry1	purinergic receptor P2Y, G-protein coupled 1 [Source:MGI Symbol;Acc:MGI:105049]	46	54	52	45	65	63	96	47	0.316734	0.401628	0.389115	0.335712	0.509113	0.495879	0.608515	0.367969	0.360797	0.495369	0.72834	0.0485078
ENSMUSG00000050921	P2ry10	purinergic receptor P2Y, G-protein coupled 10 [Source:MGI Symbol;Acc:MGI:1926076]	0	7	4	2	0	0	0	1	0	0.0710668	0.0408528	0.0203661	0	0	0	0.0106883	0.0330714	0.00267206	12.3767	0.0163335
ENSMUSG00000023191	P3h3	prolyl 3-hydroxylase 3 [Source:MGI Symbol;Acc:MGI:1315208]	214	192	259	241	146	145	115	193	1.53918	1.49166	2.02449	1.87807	1.19451	1.19218	0.761442	1.57835	1.73335	1.18162	1.46693	0.0222408
ENSMUSG00000019916	P4ha1	procollagen-proline, 2-oxoglutarate 4-dioxygenase (proline 4-hydroxylase), alpha 1 polypeptide [Source:MGI Symbol;Acc:MGI:97463]	802	823	941	827	551	593	679	710	6.67189	7.39552	8.50759	7.4542	5.21423	5.63935	5.20006	6.71592	7.5073	5.69239	1.31883	0.0117473
ENSMUSG00000028927	Padi2	peptidyl arginine deiminase, type II [Source:MGI Symbol;Acc:MGI:1338892]	619	610	598	584	277	430	534	424	6.52243	6.94293	6.848	6.66734	3.32019	5.17949	5.17994	5.07993	6.74518	4.68989	1.43824	0.00373288
ENSMUSG00000092534	Pagr1b	PAXIP1 associated glutamate rich protein 1B [Source:MGI Symbol;Acc:MGI:5141883]	7	4	0	0	9	8	6	15	0.549327	0.339058	0	0	0.8034	0.717623	0.433468	1.3384	0.222096	0.823223	0.269789	0.0113031
ENSMUSG00000030602	Pak4	p21 (RAC1) activated kinase 4 [Source:MGI Symbol;Acc:MGI:1917834]	227	179	270	229	171	149	167	162	2.45665	2.09249	3.17559	2.68519	2.10512	1.84333	1.66378	1.99345	2.60248	1.90142	1.3687	0.0311322
ENSMUSG00000060424	Pantr1	POU domain, class 3, transcription factor 3 adjacent noncoding transcript 1 [Source:MGI Symbol;Acc:MGI:1913547]	261	274	269	307	368	383	315	425	2.20603	2.50159	2.47097	2.81146	3.53821	3.70059	2.45101	4.08446	2.49751	3.44357	0.72527	0.00582009
ENSMUSG00000005699	Pard6a	par-6 family cell polarity regulator alpha [Source:MGI Symbol;Acc:MGI:1927223]	163	154	168	167	216	149	296	257	1.4411	1.47069	1.61421	1.59972	2.17232	1.50589	2.40915	2.58353	1.53143	2.16772	0.70647	0.0083129
ENSMUSG00000020453	Patz1	POZ (BTB) and AT hook containing zinc finger 1 [Source:MGI Symbol;Acc:MGI:1891832]	313	383	408	402	479	454	598	362	1.44679	1.91229	2.04958	2.0133	2.51861	2.39892	2.54464	1.90258	1.85549	2.34119	0.792542	0.022993
ENSMUSG00000051375	Pcdh1	protocadherin 1 [Source:MGI Symbol;Acc:MGI:104692]	6709	4906	5795	6501	4301	4553	5813	4163	28.4792	22.4953	26.7341	29.9	20.7684	22.0936	22.7161	20.0932	26.9022	21.4179	1.25606	0.0275636
ENSMUSG00000051323	Pcdh19	protocadherin 19 [Source:MGI Symbol;Acc:MGI:2685563]	1228	1079	1087	818	367	707	584	989	2.63092	2.49704	2.53094	1.89882	0.894418	1.73153	1.15182	2.40924	2.38943	1.54675	1.54481	0.0131931
ENSMUSG00000104148	Pcdha2	protocadherin alpha 2 [Source:MGI Symbol;Acc:MGI:2681880]	290	230	221	330	177	203	181	207	1.59979	1.37052	1.32495	1.97242	1.11071	1.28015	0.919192	1.2984	1.56692	1.15211	1.36004	0.0403366
ENSMUSG00000104252	Pcdha4	protocadherin alpha 4 [Source:MGI Symbol;Acc:MGI:1298406]	151	142	86	167	53	101	66	52	0.670997	0.681593	0.415322	0.804044	0.267906	0.513052	0.26999	0.262736	0.642989	0.328421	1.95782	0.00128839
ENSMUSG00000103707	Pcdha6	protocadherin alpha 6 [Source:MGI Symbol;Acc:MGI:1298367]	220	136	154	142	102	107	154	85	0.858187	0.573049	0.652863	0.600163	0.45261	0.477137	0.553022	0.377007	0.671066	0.464944	1.44333	0.0280407
ENSMUSG00000103800	Pcdha8	protocadherin alpha 8 [Source:MGI Symbol;Acc:MGI:2681879]	32	34	24	86	25	7	18	14	0.326002	0.374151	0.265723	0.949274	0.28972	0.0815175	0.168814	0.162171	0.478788	0.175556	2.72727	0.00257182
ENSMUSG00000102440	Pcdhga9	protocadherin gamma subfamily A, 9 [Source:MGI Symbol;Acc:MGI:1935226]	793	475	127	208	5032	5768	229	4804	5.55659	3.5952	0.967125	1.57913	40.1089	46.2019	1.47719	38.2746	2.92451	31.5157	0.0927955	6.69e-07
ENSMUSG00000103037	Pcdhgb1	protocadherin gamma subfamily B, 1 [Source:MGI Symbol;Acc:MGI:1935169]	179	5713	7202	229	503	193	568	540	1.16453	40.1474	50.9207	1.61419	3.72247	1.43534	3.40182	3.99453	23.4617	3.13854	7.47536	0.000479142
ENSMUSG00000103081	Pcdhgb8	protocadherin gamma subfamily B, 8 [Source:MGI Symbol;Acc:MGI:1935200]	6450	31	25	31	28	17	34	29	76.0048	0.394582	0.320156	0.395793	0.375322	0.228992	0.36883	0.388555	19.2788	0.340424	56.6317	1.37e-05
ENSMUSG00000025584	Pde8a	phosphodiesterase 8A [Source:MGI Symbol;Acc:MGI:1277116]	405	357	321	396	265	266	326	248	5.10775	4.86336	4.39969	5.41116	3.80176	3.83491	3.78491	3.5563	4.94549	3.74447	1.32074	0.019957
ENSMUSG00000025823	Pdia4	protein disulfide isomerase associated 4 [Source:MGI Symbol;Acc:MGI:104864]	579	555	688	584	426	453	530	475	11.4665	11.8724	14.8076	12.531	9.5968	10.2553	9.66256	10.6959	12.6694	10.0527	1.2603	0.0393161
ENSMUSG00000002006	Pdzd4	PDZ domain containing 4 [Source:MGI Symbol;Acc:MGI:2443483]	2402	1099	1009	1012	2124	2127	2627	2293	32.903	16.2613	15.0209	15.0198	33.0965	33.3065	33.1273	35.7141	19.8012	33.8111	0.585643	0.000297199
ENSMUSG00000020717	Pecam1	platelet/endothelial cell adhesion molecule 1 [Source:MGI Symbol;Acc:MGI:97537]	322	319	326	305	524	550	493	332	1.95238	2.08927	2.14818	2.00369	3.61414	3.81216	2.75182	2.28886	2.04838	3.11675	0.657217	0.000302765
ENSMUSG00000027674	Pex5l	peroxisomal biogenesis factor 5-like [Source:MGI Symbol;Acc:MGI:1916672]	3510	4314	2118	3184	4959	3505	4548	3598	13.8429	18.3779	9.07797	13.6055	22.2474	15.8018	16.5122	16.1345	13.7261	17.674	0.776626	0.0344443
ENSMUSG00000030413	Pglyrp1	peptidoglycan recognition protein 1 [Source:MGI Symbol;Acc:MGI:1345092]	228	160	245	198	425	357	310	219	4.83581	3.66563	5.64735	4.55011	10.2539	8.6557	6.05285	5.28144	4.67473	7.56097	0.61827	0.0012229
ENSMUSG00000037652	Phc3	polyhomeotic 3 [Source:MGI Symbol;Acc:MGI:2181434]	1076	187	856	285	174	222	277	199	2.77281	0.520528	2.39732	0.795747	0.510062	0.653975	0.657132	0.58309	1.6216	0.601065	2.69788	0.000330423
ENSMUSG00000041801	Phlda3	pleckstrin homology like domain, family A, member 3 [Source:MGI Symbol;Acc:MGI:1351485]	422	412	466	369	330	280	337	306	11.4516	12.0767	13.7431	10.8493	10.1867	8.68587	8.41878	9.44169	12.0302	9.18326	1.31001	0.0220613
ENSMUSG00000048537	Phldb1	pleckstrin homology like domain, family B, member 1 [Source:MGI Symbol;Acc:MGI:2143230]	1124	1145	1483	1259	869	854	842	685	4.48954	4.9401	6.43753	5.44856	3.94839	3.89935	3.09607	3.11099	5.32893	3.5137	1.51661	0.000202779
ENSMUSG00000038611	Phrf1	PHD and ring finger domains 1 [Source:MGI Symbol;Acc:MGI:2141847]	468	542	406	415	315	339	406	325	1.77184	2.21652	1.6705	1.70234	1.3566	1.46716	1.41504	1.39905	1.8403	1.40946	1.30568	0.0256609
ENSMUSG00000028101	Pias3	protein inhibitor of activated STAT 3 [Source:MGI Symbol;Acc:MGI:1913126]	321	282	355	394	513	286	492	422	1.85648	1.76169	2.2313	2.4689	3.37496	1.89083	2.61948	2.77506	2.07959	2.66508	0.780311	0.0365005
ENSMUSG00000079469	Pigb	phosphatidylinositol glycan anchor biosynthesis, class B [Source:MGI Symbol;Acc:MGI:1891825]	585	546	672	517	419	436	410	437	1.85934	1.87452	2.32121	1.78039	1.51489	1.58412	1.19964	1.57927	1.95886	1.46948	1.33303	0.0141167
ENSMUSG00000045625	Pigz	phosphatidylinositol glycan anchor biosynthesis, class Z [Source:MGI Symbol;Acc:MGI:2443822]	197	159	175	159	129	116	162	94	3.43261	2.99261	3.31391	3.00177	2.55691	2.31056	2.59859	1.86234	3.18523	2.3321	1.36582	0.0390937
ENSMUSG00000026447	Pik3c2b	phosphatidylinositol-4-phosphate 3-kinase catalytic subunit type 2 beta [Source:MGI Symbol;Acc:MGI:2685045]	437	334	274	400	228	256	333	258	2.19861	1.81513	1.49817	2.18046	1.30487	1.47234	1.54232	1.47591	1.92309	1.44886	1.32732	0.0374798
ENSMUSG00000020573	Pik3cg	phosphatidylinositol-4,5-bisphosphate 3-kinase catalytic subunit gamma [Source:MGI Symbol;Acc:MGI:1353576]	69	56	48	63	67	85	93	69	0.230884	0.202408	0.174554	0.228406	0.255028	0.325136	0.286479	0.262525	0.209063	0.282292	0.740591	0.0414223
ENSMUSG00000024014	Pim1	proviral integration site 1 [Source:MGI Symbol;Acc:MGI:97584]	20	34	28	31	47	50	42	28	0.142009	0.260768	0.21606	0.238489	0.379614	0.405834	0.274534	0.226053	0.214331	0.321509	0.666642	0.0466142
ENSMUSG00000038725	Pkhd1l1	polycystic kidney and hepatic disease 1-like 1 [Source:MGI Symbol;Acc:MGI:2183153]	7	3	8	3	0	1	1	1	0.0179095	0.00829062	0.0222436	0.00831705	0	0.00292491	0.00235613	0.0029094	0.0141902	0.00204761	6.93012	0.00199211
ENSMUSG00000097107	Platr6	pluripotency associated transcript 6 [Source:MGI Symbol;Acc:MGI:3779636]	0	0	0	0	4	3	1	0	0	0	0	0	0.136098	0.102594	0.0275478	0	0	0.0665599	0	0.0258829
ENSMUSG00000046223	Plaur	plasminogen activator, urokinase receptor [Source:MGI Symbol;Acc:MGI:97612]	6	9	20	9	28	23	18	13	0.0627818	0.101727	0.227437	0.10204	0.33329	0.275126	0.173395	0.154671	0.123497	0.23412	0.527492	0.0318571
ENSMUSG00000074170	Plekhf1	pleckstrin homology domain containing, family F (with FYVE domain) member 1 [Source:MGI Symbol;Acc:MGI:1919537]	162	102	132	132	172	157	191	166	1.67392	1.13845	1.4823	1.47779	2.02168	1.85446	1.81684	1.95029	1.44312	1.91082	0.755234	0.0237919
ENSMUSG00000040624	Plekhg1	pleckstrin homology domain containing, family G (with RhoGef domain) member 1 [Source:MGI Symbol;Acc:MGI:2676551]	293	175	248	155	346	400	462	272	0.99955	0.644866	0.919458	0.572916	1.3427	1.5599	1.45092	1.05507	0.784198	1.35214	0.579966	0.000116537
ENSMUSG00000060716	Plekhh1	pleckstrin homology domain containing, family H (with MyTH4 domain) member 1 [Source:MGI Symbol;Acc:MGI:2144989]	707	574	453	643	314	398	447	406	3.78349	3.31803	2.6346	3.72826	1.91147	2.43476	2.20214	2.47043	3.36609	2.2547	1.49292	0.00117273
ENSMUSG00000002831	Plin4	perilipin 4 [Source:MGI Symbol;Acc:MGI:1929709]	394	298	403	314	532	555	717	371	1.62469	1.32735	1.80602	1.40289	2.49546	2.61618	2.72181	1.73949	1.54024	2.39323	0.64358	0.000150095
ENSMUSG00000031425	Plp1	proteolipid protein (myelin) 1 [Source:MGI Symbol;Acc:MGI:97623]	27262	22851	23174	23685	20005	17564	20052	17510	180.888	163.776	167.107	170.273	150.992	133.221	122.482	132.102	170.511	134.699	1.26586	0.0124727
ENSMUSG00000017754	Pltp	phospholipid transfer protein [Source:MGI Symbol;Acc:MGI:103151]	1404	955	1758	1104	937	877	928	849	19.1214	14.0492	26.0205	16.2909	14.5164	13.6538	11.635	13.1472	18.8705	13.2381	1.42547	0.00648003
ENSMUSG00000024521	Pmaip1	phorbol-12-myristate-13-acetate-induced protein 1 [Source:MGI Symbol;Acc:MGI:1930146]	73	60	47	54	96	125	131	88	0.648985	0.576182	0.454105	0.520149	0.970847	1.27035	1.07213	0.88955	0.549855	1.05072	0.523313	3.12e-05
ENSMUSG00000025608	Podxl	podocalyxin-like [Source:MGI Symbol;Acc:MGI:1351317]	765	540	629	584	917	979	816	544	7.26926	5.54265	6.49565	6.01261	9.91204	10.6344	7.13811	5.87761	6.33004	8.39053	0.754427	0.0167835
ENSMUSG00000020471	Pold2	polymerase (DNA directed), delta 2, regulatory subunit [Source:MGI Symbol;Acc:MGI:1097163]	276	226	291	285	197	157	189	189	5.56314	4.92055	6.3745	6.22411	4.5169	3.61751	3.50701	4.33157	5.77058	3.99325	1.44508	0.0060018
ENSMUSG00000022476	Polr3h	polymerase (RNA) III (DNA directed) polypeptide H [Source:MGI Symbol;Acc:MGI:1926179]	705	520	721	438	286	439	445	541	4.84263	3.85824	5.38233	3.25977	2.23472	3.44712	2.81395	4.22535	4.33574	3.18029	1.36332	0.0483586
ENSMUSG00000078451	Ppil6	peptidylprolyl isomerase (cyclophilin)-like 6 [Source:MGI Symbol;Acc:MGI:1920325]	10	15	22	20	28	27	36	22	0.313427	0.507854	0.749418	0.679218	0.998334	0.967408	1.03877	0.78406	0.562479	0.947143	0.593869	0.021626
ENSMUSG00000004455	Ppp1cc	protein phosphatase 1 catalytic subunit gamma [Source:MGI Symbol;Acc:MGI:104872]	1116	273	1626	331	275	712	251	138	8.18586	2.163	12.9618	2.63057	2.29455	5.97008	1.69488	1.15094	6.4853	2.77761	2.33485	0.0204227
ENSMUSG00000037166	Ppp1r14a	protein phosphatase 1, regulatory inhibitor subunit 14A [Source:MGI Symbol;Acc:MGI:1931139]	354	263	363	324	216	196	219	250	12.1	9.7103	13.4844	11.9991	8.39847	7.65839	6.89112	9.7162	11.8235	8.16604	1.44788	0.00560373
ENSMUSG00000095869	Ppp1r2-ps6	protein phosphatase 1, regulatory (inhibitor) subunit 2, pseudogene 6 [Source:MGI Symbol;Acc:MGI:3644697]	23	24	9	14	22	28	37	26	2.0141	2.27021	0.856526	1.32839	2.19153	2.80294	2.98284	2.58881	1.61731	2.64153	0.612261	0.0375098
ENSMUSG00000035179	Ppp1r32	protein phosphatase 1, regulatory subunit 32 [Source:MGI Symbol;Acc:MGI:1915002]	16	13	27	17	7	1	1	3	0.442362	0.388227	0.81124	0.50923	0.220138	0.0316074	0.0254611	0.0943197	0.537765	0.0928816	5.78979	7.09e-06
ENSMUSG00000052221	Ppp1r36	protein phosphatase 1, regulatory subunit 36 [Source:MGI Symbol;Acc:MGI:2684916]	30	11	33	25	17	14	11	7	0.369773	0.146455	0.442051	0.333864	0.238352	0.197267	0.12482	0.0981039	0.323036	0.164636	1.96213	0.0244149
ENSMUSG00000055897	Ppp4r1l-ps	protein phosphatase 4, regulatory subunit 1-like, pseudogene [Source:MGI Symbol;Acc:MGI:1924560]	117	148	108	115	195	179	156	234	0.33615	0.459308	0.33722	0.357987	0.637306	0.587896	0.412608	0.764429	0.372666	0.60056	0.620531	0.00138416
ENSMUSG00000021209	Ppp4r4	protein phosphatase 4, regulatory subunit 4 [Source:MGI Symbol;Acc:MGI:1921771]	1099	837	1016	1094	1318	1410	1385	1230	12.0301	9.89672	12.0867	12.9751	16.4116	17.6437	13.9568	15.3091	11.7471	15.8303	0.742067	0.000747599
ENSMUSG00000027611	Procr	protein C receptor, endothelial [Source:MGI Symbol;Acc:MGI:104596]	5	7	6	2	18	15	11	15	0.0721094	0.109041	0.0940393	0.0312486	0.295283	0.247286	0.146037	0.245959	0.0766095	0.233641	0.327894	0.000468589
ENSMUSG00000036864	Proser3	proline and serine rich 3 [Source:MGI Symbol;Acc:MGI:2681861]	32	29	38	28	23	18	21	15	0.299106	0.2928	0.386019	0.283568	0.244548	0.192329	0.180703	0.159421	0.315373	0.19425	1.62354	0.0358706
ENSMUSG00000027881	Prpf38b	PRP38 pre-mRNA processing factor 38 (yeast) domain containing B [Source:MGI Symbol;Acc:MGI:1914171]	594	415	616	401	263	299	410	313	2.17615	1.64227	2.45259	1.59172	1.09603	1.2522	1.38277	1.30382	1.96568	1.25871	1.56167	0.000694492
ENSMUSG00000046574	Prr12	proline rich 12 [Source:MGI Symbol;Acc:MGI:2679002]	1666	1182	1549	1728	1156	1208	1341	969	11.2644	8.6327	11.3823	12.659	8.89114	9.33687	8.34695	7.44958	10.9846	8.50613	1.29137	0.0248843
ENSMUSG00000055945	Prr18	proline rich 18 [Source:MGI Symbol;Acc:MGI:2443403]	725	614	588	993	544	356	721	321	5.53747	5.06565	4.88082	8.21757	4.72646	3.10829	5.06958	2.78773	5.92538	3.92302	1.51041	0.0116265
ENSMUSG00000009210	Prr29	proline rich 29 [Source:MGI Symbol;Acc:MGI:1922823]	3	3	5	8	2	0	0	1	0.0457303	0.0493905	0.0828275	0.132106	0.0346816	0	0	0.0173325	0.0775135	0.0130035	5.96096	0.00507843
ENSMUSG00000027171	Prrg4	proline rich Gla (G-carboxyglutamic acid) 4 (transmembrane) [Source:MGI Symbol;Acc:MGI:2442211]	11	14	13	10	2	3	11	4	0.175426	0.241169	0.225319	0.172784	0.0362886	0.0546966	0.161497	0.0725242	0.203674	0.0812516	2.50671	0.0160773
ENSMUSG00000020323	Prss57	protease, serine 57 [Source:MGI Symbol;Acc:MGI:1920356]	14	7	24	17	22	28	32	26	0.123438	0.0666654	0.229966	0.162396	0.220645	0.282202	0.259733	0.260644	0.145616	0.255806	0.569244	0.0212034
ENSMUSG00000026238	Ptma	prothymosin alpha [Source:MGI Symbol;Acc:MGI:97803]	1248	1014	1117	1930	2641	1836	3219	982	23.0453	20.2255	22.4163	38.6141	55.4754	38.7561	54.7208	20.6183	26.0753	42.3926	0.61509	0.0052451
ENSMUSG00000035916	Ptprq	protein tyrosine phosphatase, receptor type, Q [Source:MGI Symbol;Acc:MGI:1096349]	2	3	3	2	6	13	3	6	0.0138194	0.022392	0.0225261	0.0149731	0.0471627	0.10269	0.0190847	0.04714	0.0184277	0.0540194	0.341131	0.0263142
ENSMUSG00000049184	Purg	purine-rich element binding protein G [Source:MGI Symbol;Acc:MGI:1922279]	248	247	313	287	165	227	246	165	4.71727	5.07493	6.47032	5.91483	3.57015	4.93589	4.30762	3.56857	5.54434	4.09556	1.35374	0.0374285
ENSMUSG00000029917	Qrfprl	pyroglutamylated RFamide peptide receptor like [Source:MGI Symbol;Acc:MGI:2441881]	4	5	7	7	0	1	1	0	0.0564982	0.076288	0.107459	0.107133	0	0.0161485	0.0130083	0	0.0868446	0.0072892	11.9141	0.000155971
ENSMUSG00000079179	Rab10os	RAB10, member RAS oncogene family, opposite strand [Source:MGI Symbol;Acc:MGI:1921423]	468	391	386	428	322	309	355	308	2.76878	2.4987	2.48184	2.74352	2.16702	2.08978	1.93346	2.07189	2.62321	2.06554	1.26999	0.0361055
ENSMUSG00000079657	Rab26	RAB26, member RAS oncogene family [Source:MGI Symbol;Acc:MGI:2443284]	755	630	519	577	456	408	581	480	8.25954	7.44464	6.17049	6.83921	5.67465	5.10233	5.85126	5.97067	7.17847	5.64973	1.27059	0.0400025
ENSMUSG00000022159	Rab2b	RAB2B, member RAS oncogene family [Source:MGI Symbol;Acc:MGI:1923588]	298	285	374	285	363	255	789	408	1.6235	1.67716	2.21437	1.68229	2.24961	1.58809	3.95709	2.52737	1.79933	2.58054	0.697269	0.0170434
ENSMUSG00000020732	Rab37	RAB37, member RAS oncogene family [Source:MGI Symbol;Acc:MGI:1929945]	53	52	47	59	71	83	98	61	0.510947	0.541495	0.492424	0.61627	0.778611	0.91469	0.869734	0.668655	0.540284	0.807922	0.668732	0.007519
ENSMUSG00000017491	Rarb	retinoic acid receptor, beta [Source:MGI Symbol;Acc:MGI:97857]	61	74	63	60	42	35	54	41	0.382088	0.500679	0.428862	0.407195	0.299262	0.250614	0.311379	0.292002	0.429706	0.288314	1.49041	0.0275798
ENSMUSG00000001288	Rarg	retinoic acid receptor, gamma [Source:MGI Symbol;Acc:MGI:97858]	164	166	173	133	109	83	159	91	1.48372	1.62222	1.70097	1.30371	1.12175	0.858387	1.32425	0.936091	1.52765	1.06012	1.44102	0.0251608
ENSMUSG00000049892	Rasd1	RAS, dexamethasone-induced 1 [Source:MGI Symbol;Acc:MGI:1270848]	629	764	871	704	982	956	1107	827	21.2328	27.8577	31.9535	25.7485	37.708	36.8905	34.4008	31.7421	26.6981	35.1854	0.758785	0.00282059
ENSMUSG00000034209	Rasl10a	RAS-like, family 10, member A [Source:MGI Symbol;Acc:MGI:1922918]	634	634	999	714	436	360	510	640	20.5471	22.1945	35.186	25.0715	16.0735	13.3372	15.2158	23.5838	25.7497	17.0526	1.51002	0.00555288
ENSMUSG00000049832	Rbx1-ps	ring-box 1, pseudogene [Source:MGI Symbol;Acc:MGI:3710517]	146	168	208	166	196	188	263	218	24.2805	30.1793	37.5934	29.9113	37.0788	35.7406	40.2647	41.2225	30.4911	38.5767	0.790404	0.044594
ENSMUSG00000025921	Rdh10	retinol dehydrogenase 10 (all-trans) [Source:MGI Symbol;Acc:MGI:1924238]	221	212	248	215	167	152	189	153	2.16703	2.24545	2.64282	2.28419	1.86275	1.70379	1.70608	1.70584	2.33487	1.74462	1.33833	0.0289135
ENSMUSG00000070645	Ren1	renin 1 structural [Source:MGI Symbol;Acc:MGI:97898]	1	1	9	0	0	0	0	0	0.0301088	0.0325079	0.294357	0	0	0	0	0	0.0892434	0	Inf	0.0200819
ENSMUSG00000030222	Rerg	RAS-like, estrogen-regulated, growth-inhibitor [Source:MGI Symbol;Acc:MGI:2665139]	405	374	426	417	249	254	336	296	4.02644	4.01635	4.60276	4.49182	2.81598	2.88668	3.07517	3.34603	4.28434	3.03096	1.41352	0.0026356
ENSMUSG00000043190	Rfesd	Rieske (Fe-S) domain containing [Source:MGI Symbol;Acc:MGI:2145198]	178	184	123	202	169	227	233	268	1.70752	1.9066	1.28231	2.09951	1.84415	2.48927	2.05763	2.92317	1.74899	2.32856	0.751103	0.0398379
ENSMUSG00000046768	Rhoj	ras homolog family member J [Source:MGI Symbol;Acc:MGI:1931551]	97	59	72	51	148	123	89	78	0.614015	0.403418	0.495319	0.349788	1.0657	0.890046	0.518639	0.561404	0.465635	0.758948	0.613527	0.0107295
ENSMUSG00000044456	Rin3	Ras and Rab interactor 3 [Source:MGI Symbol;Acc:MGI:2385708]	78	48	46	66	101	97	100	60	0.545705	0.362744	0.349758	0.500301	0.8038	0.775776	0.64406	0.477299	0.439627	0.675234	0.651074	0.0129739
ENSMUSG00000065037	Rn7sk	RNA, 7SK, nuclear [Source:MGI Symbol;Acc:MGI:103186]	12	9	6	12	23	9	18	18	1.97146	1.59721	1.07137	2.13604	4.29843	1.69028	2.72245	3.36265	1.69402	3.01845	0.561221	0.0450173
ENSMUSG00000035896	Rnase1	ribonuclease, RNase A family, 1 (pancreatic) [Source:MGI Symbol;Acc:MGI:97919]	2	6	5	3	5	12	20	7	0.109636	0.355293	0.297912	0.178213	0.311824	0.752016	1.00932	0.436325	0.235264	0.627371	0.374999	0.0118964
ENSMUSG00000093989	Rnasek	ribonuclease, RNase K [Source:MGI Symbol;Acc:MGI:106369]	700	662	796	598	713	1450	820	664	26.6018	27.1747	32.8753	24.6227	30.8225	62.9913	28.6874	28.6916	27.8186	37.7982	0.735978	0.0337791
ENSMUSG00000001313	Rnd2	Rho family GTPase 2 [Source:MGI Symbol;Acc:MGI:1338755]	756	847	786	771	474	458	636	532	17.562	21.2535	19.8434	19.4056	12.5255	12.1623	13.601	14.0519	19.5161	13.0852	1.49147	9.89e-05
ENSMUSG00000033107	Rnf125	ring finger protein 125 [Source:MGI Symbol;Acc:MGI:1914914]	14	13	11	23	48	25	21	28	0.330598	0.331586	0.28228	0.588437	1.28932	0.674846	0.456504	0.751775	0.383225	0.793111	0.483192	0.00754657
ENSMUSG00000033967	Rnf225	ring finger protein 225 [Source:MGI Symbol;Acc:MGI:1924198]	12	8	4	0	12	23	16	11	0.201468	0.145086	0.0729775	0	0.229188	0.441441	0.247304	0.209985	0.104883	0.28198	0.371952	0.01157
ENSMUSG00000035305	Ror1	receptor tyrosine kinase-like orphan receptor 1 [Source:MGI Symbol;Acc:MGI:1347520]	79	109	70	104	111	144	125	104	0.745604	1.11122	0.717996	1.06349	1.1917	1.5536	1.08606	1.11606	0.909578	1.23686	0.735394	0.0423487
ENSMUSG00000036192	Rorb	RAR-related orphan receptor beta [Source:MGI Symbol;Acc:MGI:1343464]	305	234	266	233	153	210	250	123	1.0946	0.907119	1.03748	0.906007	0.624611	0.861535	0.825957	0.501917	0.9863	0.703505	1.40198	0.0338044
ENSMUSG00000059291	Rpl11	ribosomal protein L11 [Source:MGI Symbol;Acc:MGI:1914275]	176	166	223	160	327	256	274	260	2.10633	2.14594	2.90043	2.0747	4.45171	3.50231	3.01876	3.53802	2.30685	3.6277	0.635899	0.000332574
ENSMUSG00000098915	Rpl15-ps2	ribosomal protein L15, pseudogene 2 [Source:MGI Symbol;Acc:MGI:3648255]	105	59	70	86	50	33	56	64	9.315	5.65378	6.74893	8.26628	5.04576	3.34663	4.57343	6.45571	7.496	4.85538	1.54385	0.0308317
ENSMUSG00000116090	Rpl19-ps6	ribosomal protein L19, pseudogene 6 [Source:MGI Symbol;Acc:MGI:3644218]	95	83	102	80	150	140	152	132	8.81612	8.32008	10.2873	8.04388	15.8347	14.852	12.9856	13.9284	8.86683	14.4002	0.615745	0.000211279
ENSMUSG00000105359	Rpl21-ps10	ribosomal protein L21, pseudogene 10 [Source:MGI Symbol;Acc:MGI:3643358]	11	16	20	17	35	22	25	19	1.24625	1.95806	2.46248	2.08678	4.51067	2.84928	2.60741	2.44754	1.9384	3.10373	0.624538	0.049561
ENSMUSG00000060938	Rpl26	ribosomal protein L26 [Source:MGI Symbol;Acc:MGI:106022]	2910	2473	2538	2509	3680	3294	3089	3326	63.8881	58.647	60.5566	59.6827	91.905	82.6704	62.4322	83.0275	60.6936	80.0088	0.758586	0.00156203
ENSMUSG00000094191	Rpl31-ps14	ribosomal protein L31, pseudogene 14 [Source:MGI Symbol;Acc:MGI:3704189]	9	12	6	11	5	4	3	4	1.29482	1.86482	0.938154	1.71466	0.818332	0.657902	0.397346	0.654252	1.45311	0.631958	2.29938	0.0346812
ENSMUSG00000067575	Rpl35a-ps3	ribosomal protein L35A, pseudogene 3 [Source:MGI Symbol;Acc:MGI:3704473]	44	31	52	51	112	77	93	67	7.18561	5.46845	9.22892	9.0241	20.8061	14.3748	13.9815	12.4411	7.72677	15.4009	0.50171	0.000114858
ENSMUSG00000094664	Rpl35a-ps6	ribosomal protein L35A, pseudogene 6 [Source:MGI Symbol;Acc:MGI:3704258]	49	27	28	31	26	17	19	18	8.00204	4.76285	4.96937	5.48524	4.82993	3.17356	2.8565	3.34245	5.80487	3.55061	1.63489	0.0378269
ENSMUSG00000105388	Rpl36a-ps2	ribosomal protein L36A, pseudogene 2 [Source:MGI Symbol;Acc:MGI:3780887]	1195	1322	1278	1083	1448	1484	1721	1445	202.449	241.921	235.3	198.791	279.049	287.396	268.406	278.348	219.615	278.3	0.789131	0.00297741
ENSMUSG00000036305	Rpl39-ps	ribosomal protein L39, pseudogene [Source:MGI Symbol;Acc:MGI:3705781]	408	413	465	338	532	549	488	513	146.939	160.665	182	131.89	217.948	226.02	161.793	210.071	155.373	203.958	0.761791	0.00756797
ENSMUSG00000093674	Rpl41	ribosomal protein L41 [Source:MGI Symbol;Acc:MGI:1915195]	1893	1694	1855	1468	2977	2180	2571	1683	31.4912	30.4401	33.537	26.4597	56.3354	41.4566	39.3735	31.8343	30.482	42.25	0.721468	0.00203135
ENSMUSG00000071052	Rpl7a-ps5	ribosomal protein L7A, pseudogene 5 [Source:MGI Symbol;Acc:MGI:3643553]	149	96	128	131	84	77	107	88	10.2309	7.12022	9.5517	9.74588	6.56102	6.04393	6.76358	6.87043	9.16217	6.55974	1.39673	0.0360786
ENSMUSG00000081281	Rpl7-ps9	ribosomal protein L7, pseudogene 9 [Source:MGI Symbol;Acc:MGI:3645367]	82	55	91	95	33	55	69	54	5.59509	4.0537	6.74803	7.02325	2.5614	4.29001	4.33417	4.18952	5.85502	3.84378	1.52325	0.038712
ENSMUSG00000047215	Rpl9	ribosomal protein L9 [Source:MGI Symbol;Acc:MGI:1298373]	132	124	139	95	165	145	170	146	0.657239	0.666909	0.752155	0.5125	0.934542	0.825311	0.779225	0.826564	0.647201	0.841411	0.769186	0.0365872
ENSMUSG00000046620	Rps11-ps4	ribosomal protein S11, pseudogene 4 [Source:MGI Symbol;Acc:MGI:3704389]	16	12	20	15	7	4	8	8	1.83571	1.48713	2.49365	1.86459	0.913528	0.524656	0.844954	1.04362	1.92027	0.83169	2.30888	0.00729976
ENSMUSG00000067058	Rps15a-ps5	ribosomal protein S15A, pseudogene 5 [Source:MGI Symbol;Acc:MGI:3642245]	12	10	11	12	3	4	8	6	1.66044	1.4947	1.65417	1.79906	0.472227	0.632792	1.01911	0.944	1.65209	0.767031	2.15388	0.0257493
ENSMUSG00000081049	Rps24-ps3	ribosomal protein S24, pseudogene 3 [Source:MGI Symbol;Acc:MGI:3644407]	195	248	260	165	279	274	312	276	26.3791	36.2387	38.2245	24.1842	42.9335	42.3718	38.8548	42.453	31.2567	41.6533	0.750401	0.0160053
ENSMUSG00000050621	Rps27rt	ribosomal protein S27, retrogene [Source:MGI Symbol;Acc:MGI:3704345]	2841	3457	2913	2597	3765	3534	3919	3546	413.097	542.969	460.325	409.142	622.746	587.418	524.591	586.264	456.383	580.255	0.786523	0.00409614
ENSMUSG00000081684	Rps2-ps13	ribosomal protein S2, pseudogene 13 [Source:MGI Symbol;Acc:MGI:3705640]	340	453	460	332	560	457	597	486	20.9635	30.1701	30.8237	22.1791	39.2769	32.2107	33.8862	34.0717	26.0341	34.8614	0.746789	0.00534127
ENSMUSG00000104699	Rps4x-ps	Rps4x retrotransposed pseudogene [Source:MGI Symbol;Acc:MGI:3644569]	4	5	5	5	7	7	15	12	0.274298	0.370377	0.372672	0.371533	0.546043	0.548727	0.946955	0.935667	0.34722	0.744348	0.466475	0.0287068
ENSMUSG00000021180	Rps6ka5	ribosomal protein S6 kinase, polypeptide 5 [Source:MGI Symbol;Acc:MGI:1920336]	605	492	467	524	279	338	545	415	1.8997	1.66874	1.59364	1.78272	0.99655	1.21324	1.5754	1.48167	1.7362	1.31671	1.31859	0.037693
ENSMUSG00000061477	Rps7	ribosomal protein S7 [Source:MGI Symbol;Acc:MGI:1333818]	559	709	611	522	874	812	883	803	10.4001	14.2484	12.354	10.5224	18.4969	17.2695	15.1234	16.9868	11.8812	16.9692	0.700165	0.000172009
ENSMUSG00000071303	Rps8-ps1	ribosomal protein S8, pseudogene 1 [Source:MGI Symbol;Acc:MGI:3647445]	193	102	153	152	65	55	109	108	16.82	9.60202	14.4911	14.3527	6.44387	5.47939	8.74499	10.702	13.8164	7.84256	1.76173	0.00315861
ENSMUSG00000083481	Rps8-ps2	ribosomal protein S8, pseudogene 2 [Source:MGI Symbol;Acc:MGI:3649696]	207	133	176	152	95	96	108	137	18.0401	12.5203	16.6696	14.3527	9.418	9.564	8.66473	13.5757	15.3957	10.3056	1.49391	0.0138657
ENSMUSG00000080746	Rpsa-ps12	ribosomal protein SA, pseudogene 12 [Source:MGI Symbol;Acc:MGI:3651234]	21	20	12	9	29	22	39	23	1.28027	1.31708	0.795048	0.594509	2.01116	1.53325	2.18886	1.59438	0.996726	1.83191	0.544091	0.00949444
ENSMUSG00000024033	Rsph1	radial spoke head 1 homolog (Chlamydomonas) [Source:MGI Symbol;Acc:MGI:1194909]	51	29	111	79	23	27	32	32	1.62764	0.999713	3.8499	2.7317	0.834965	0.985007	0.940161	1.16121	2.30224	0.980336	2.34842	0.00160968
ENSMUSG00000056054	S100a8	S100 calcium binding protein A8 (calgranulin A) [Source:MGI Symbol;Acc:MGI:88244]	5	2	6	1	28	10	8	0	0.276346	0.119394	0.360388	0.0599074	1.76027	0.631764	0.407021	0	0.204009	0.699765	0.291539	0.0412986
ENSMUSG00000045087	S1pr5	sphingosine-1-phosphate receptor 5 [Source:MGI Symbol;Acc:MGI:2150641]	461	286	382	364	258	224	246	299	10.028	6.72006	9.03066	8.57896	6.38406	5.57007	4.9262	7.39532	8.58942	6.06891	1.41531	0.0120036
ENSMUSG00000071054	Safb	scaffold attachment factor B [Source:MGI Symbol;Acc:MGI:2146974]	1691	1424	1865	1653	1251	1176	1461	1333	7.49221	6.81508	8.98025	7.93525	6.30505	5.95626	5.95911	6.71537	7.8057	6.23395	1.25213	0.0299242
ENSMUSG00000096351	Samd11	sterile alpha motif domain containing 11 [Source:MGI Symbol;Acc:MGI:2446220]	13	16	12	11	22	27	21	20	0.0976735	0.129852	0.0979806	0.0895469	0.188027	0.231895	0.145251	0.170857	0.103763	0.184007	0.563908	0.016197
ENSMUSG00000048652	Samd13	sterile alpha motif domain containing 13 [Source:MGI Symbol;Acc:MGI:2686498]	1	2	5	0	0	0	0	0	0.0137773	0.0297502	0.0748363	0	0	0	0	0	0.029591	0	Inf	0.031131
ENSMUSG00000087064	Sap30bpos	SAP30 binding protein, opposite strand [Source:MGI Symbol;Acc:MGI:3650575]	5	1	9	9	3	0	0	0	0.115614	0.0249752	0.226149	0.225469	0.0789053	0	0	0	0.148052	0.0197263	7.50529	0.00389199
ENSMUSG00000020088	Sar1a	secretion associated Ras related GTPase 1A [Source:MGI Symbol;Acc:MGI:98230]	2747	2344	2709	2255	2060	1794	998	651	29.4242	27.1205	31.5354	26.1706	25.1002	21.9669	9.84102	7.92866	28.5627	16.2092	1.76213	0.00449666
ENSMUSG00000027959	Sass6	SAS-6 centriolar assembly protein [Source:MGI Symbol;Acc:MGI:1920026]	66	92	57	99	51	54	66	34	0.413551	0.62268	0.38815	0.672106	0.363508	0.386792	0.380704	0.242232	0.524122	0.343309	1.52668	0.0415992
ENSMUSG00000050195	Scd4	stearoyl-coenzyme A desaturase 4 [Source:MGI Symbol;Acc:MGI:2670997]	8	10	15	13	4	7	5	5	0.107789	0.145545	0.219654	0.189787	0.0613049	0.107815	0.0620197	0.076598	0.165694	0.0769344	2.1537	0.0339065
ENSMUSG00000064057	Scgb3a1	secretoglobin, family 3A, member 1 [Source:MGI Symbol;Acc:MGI:1915912]	1	2	0	0	15	7	3	2	0.0909809	0.196461	0	0	1.55172	0.72766	0.251165	0.20683	0.0718604	0.684343	0.105006	0.0016486
ENSMUSG00000020877	Scrn2	secernin 2 [Source:MGI Symbol;Acc:MGI:1343092]	98	81	96	71	35	48	84	60	1.55831	1.39125	1.65898	1.22322	0.633077	0.872496	1.22962	1.08481	1.45794	0.955001	1.52664	0.0292253
ENSMUSG00000026582	Sele	selectin, endothelial cell [Source:MGI Symbol;Acc:MGI:98278]	0	0	0	0	17	0	0	0	0	0	0	0	0.36113	0	0	0	0	0.0902824	0	0.0197597
ENSMUSG00000026580	Selp	selectin, platelet [Source:MGI Symbol;Acc:MGI:98280]	0	0	0	0	10	5	0	0	0	0	0	0	0.101111	0.0508105	0	0	0	0.0379804	0	0.00713215
ENSMUSG00000066361	Serpina3c	serine (or cysteine) peptidase inhibitor, clade A, member 3C [Source:MGI Symbol;Acc:MGI:102848]	1	3	3	0	8	9	4	1	0.024585	0.0796319	0.0801087	0	0.22364	0.252817	0.0904789	0.027945	0.0460814	0.14872	0.309853	0.0453645
ENSMUSG00000066363	Serpina3f	serine (or cysteine) peptidase inhibitor, clade A, member 3F [Source:MGI Symbol;Acc:MGI:2182838]	0	2	0	0	14	8	0	0	0	0.0366563	0	0	0.27023	0.155168	0	0	0.00916408	0.106349	0.0861697	0.0256702
ENSMUSG00000021091	Serpina3n	serine (or cysteine) peptidase inhibitor, clade A, member 3N [Source:MGI Symbol;Acc:MGI:105045]	995	949	1203	1377	2684	1950	1127	942	26.216	27.0087	34.447	39.3096	80.4434	58.7324	27.3358	28.2207	31.7453	48.683	0.652082	0.0181644
ENSMUSG00000044734	Serpinb1a	serine (or cysteine) peptidase inhibitor, clade B, member 1a [Source:MGI Symbol;Acc:MGI:1913472]	123	149	141	135	63	86	92	124	2.44926	3.20488	3.05137	2.91264	1.42703	1.95763	1.68648	2.80754	2.90454	1.96967	1.47463	0.0295079
ENSMUSG00000022766	Serpind1	serine (or cysteine) peptidase inhibitor, clade D, member 1 [Source:MGI Symbol;Acc:MGI:96051]	62	46	37	27	22	28	21	14	0.881935	0.706807	0.572002	0.416141	0.355987	0.455303	0.275001	0.226437	0.644221	0.328182	1.963	0.00584635
ENSMUSG00000037411	Serpine1	serine (or cysteine) peptidase inhibitor, clade E, member 1 [Source:MGI Symbol;Acc:MGI:97608]	22	18	13	22	52	42	29	21	0.206134	0.182176	0.132381	0.223343	0.554237	0.449857	0.250144	0.223725	0.186009	0.369491	0.503419	0.00644025
ENSMUSG00000032009	Sesn3	sestrin 3 [Source:MGI Symbol;Acc:MGI:1922997]	1608	195	166	1530	267	261	332	238	5.10662	0.668924	0.572927	5.26454	0.964548	0.947518	0.970622	0.859403	2.90325	0.935523	3.10335	0.00242071
ENSMUSG00000024949	Sf1	splicing factor 1 [Source:MGI Symbol;Acc:MGI:1095403]	1705	1104	1240	1628	1120	1048	1208	989	7.0387	4.92302	5.56331	7.28188	5.25958	4.94572	4.59091	4.64235	6.20173	4.85964	1.27617	0.0384952
ENSMUSG00000025915	Sgk3	serum/glucocorticoid regulated kinase 3 [Source:MGI Symbol;Acc:MGI:2182368]	190	169	215	177	336	278	306	189	0.433085	0.416102	0.532599	0.437134	0.87121	0.724375	0.642103	0.489839	0.45473	0.681882	0.666875	0.00229341
ENSMUSG00000045349	Sh2d5	SH2 domain containing 5 [Source:MGI Symbol;Acc:MGI:2446215]	625	432	1149	738	928	801	1202	1101	7.17968	5.36047	14.3446	9.18548	12.1266	10.5186	12.7114	14.3809	9.01755	12.4343	0.725213	0.0260484
ENSMUSG00000028082	Sh3d19	SH3 domain protein D19 [Source:MGI Symbol;Acc:MGI:1350923]	325	296	421	348	242	227	315	249	0.991311	0.975241	1.39557	1.15008	0.839665	0.791502	0.884504	0.863572	1.12805	0.844811	1.33527	0.0279816
ENSMUSG00000037541	Shank2	SH3 and multiple ankyrin repeat domains 2 [Source:MGI Symbol;Acc:MGI:2671987]	1911	1716	966	2057	1399	1607	4038	2273	5.81032	5.63575	3.19197	6.77634	4.83862	5.58541	11.3024	7.858	5.3536	7.3961	0.72384	0.0474683
ENSMUSG00000044461	Shisa2	shisa family member 2 [Source:MGI Symbol;Acc:MGI:2444716]	115	106	122	109	79	69	102	77	1.68342	1.67608	1.94087	1.72879	1.31548	1.15462	1.37455	1.28161	1.75729	1.28156	1.37121	0.0418912
ENSMUSG00000096883	Shisa8	shisa family member 8 [Source:MGI Symbol;Acc:MGI:2146080]	71	68	36	52	39	24	38	23	1.23357	1.27618	0.679748	0.978887	0.770802	0.476677	0.607789	0.454373	1.0421	0.57741	1.80478	0.00759184
ENSMUSG00000093460	Six3os1	SIX homeobox 3, opposite strand 1 [Source:MGI Symbol;Acc:MGI:1925118]	0	0	8	2	0	0	0	0	0	0	0.0216736	0.00540171	0	0	0	0	0.00676882	0	Inf	0.0344873
ENSMUSG00000055717	Slain1	SLAIN motif family, member 1 [Source:MGI Symbol;Acc:MGI:2145578]	1342	1270	1086	1135	925	807	1067	886	13.8089	14.1158	12.1445	12.6539	10.8272	9.49251	10.1073	10.3661	13.1808	10.1983	1.29245	0.0109482
ENSMUSG00000024597	Slc12a2	solute carrier family 12, member 2 [Source:MGI Symbol;Acc:MGI:101924]	1557	1349	1638	1529	1172	1071	1446	1151	7.69748	7.20388	8.80069	8.19009	6.59102	6.0527	6.58101	6.47006	7.97304	6.4237	1.24119	0.0318839
ENSMUSG00000024552	Slc14a2	solute carrier family 14 (urea transporter), member 2 [Source:MGI Symbol;Acc:MGI:1351653]	7	5	10	6	4	4	2	0	0.0543912	0.0419644	0.0844401	0.0505094	0.0353517	0.0355318	0.0143042	0	0.0578263	0.0212969	2.71524	0.0310738
ENSMUSG00000019838	Slc16a10	solute carrier family 16 (monocarboxylic acid transporters), member 10 [Source:MGI Symbol;Acc:MGI:1919722]	45	18	54	56	70	69	71	76	0.270017	0.116667	0.352144	0.364073	0.4778	0.473289	0.392198	0.518525	0.275725	0.465453	0.592379	0.0110131
ENSMUSG00000040918	Slc19a2	solute carrier family 19 (thiamine transporter), member 2 [Source:MGI Symbol;Acc:MGI:1928761]	180	153	100	172	283	131	384	197	1.35091	1.24034	0.815634	1.39864	2.41605	1.1239	2.65308	1.6811	1.20138	1.96853	0.610292	0.00611674
ENSMUSG00000027397	Slc20a1	solute carrier family 20, member 1 [Source:MGI Symbol;Acc:MGI:108392]	1968	1748	1474	1519	1120	1370	1471	1340	10.7141	10.2794	8.7211	8.96004	6.93607	8.52612	7.37238	8.29485	9.66865	7.78235	1.24238	0.0453272
ENSMUSG00000061742	Slc22a12	solute carrier family 22 (organic anion/cation transporter), member 12 [Source:MGI Symbol;Acc:MGI:1195269]	12	5	9	9	3	6	4	3	0.227529	0.102409	0.185461	0.184903	0.064709	0.130045	0.0698151	0.0646886	0.175076	0.0823144	2.12691	0.0496476
ENSMUSG00000023828	Slc22a3	solute carrier family 22 (organic cation transporter), member 3 [Source:MGI Symbol;Acc:MGI:1333817]	20	20	10	9	1	7	10	5	0.166103	0.179419	0.090256	0.0809869	0.0094443	0.066454	0.0764544	0.0472128	0.129191	0.0498914	2.58945	0.0115368
ENSMUSG00000063796	Slc22a8	solute carrier family 22 (organic anion transporter), member 8 [Source:MGI Symbol;Acc:MGI:1336187]	161	120	179	112	89	99	132	79	1.52269	1.22592	1.83984	1.14768	0.957506	1.07034	1.14927	0.849541	1.43403	1.00666	1.42454	0.0384583
ENSMUSG00000034452	Slc24a1	solute carrier family 24 (sodium/potassium/calcium exchanger), member 1 [Source:MGI Symbol;Acc:MGI:2384871]	7	10	12	1	2	0	3	4	0.0730259	0.112683	0.136041	0.011308	0.0237376	0	0.028812	0.0474405	0.0832646	0.0249975	3.33092	0.0323772
ENSMUSG00000037636	Slc25a43	solute carrier family 25, member 43 [Source:MGI Symbol;Acc:MGI:2684854]	2	3	2	6	0	0	2	0	0.0489245	0.0792737	0.0531656	0.159026	0	0	0.0450359	0	0.0850974	0.011259	7.55818	0.0228188
ENSMUSG00000024600	Slc27a6	solute carrier family 27 (fatty acid transporter), member 6 [Source:MGI Symbol;Acc:MGI:3036230]	1	1	0	0	1	8	1	4	0.021894	0.0236385	0	0	0.0248858	0.200126	0.0201537	0.0995201	0.0113831	0.0861713	0.132099	0.0215244
ENSMUSG00000021553	Slc28a3	solute carrier family 28 (sodium-coupled nucleoside transporter), member 3 [Source:MGI Symbol;Acc:MGI:2137361]	0	5	15	1	1	2	0	0	0	0.034364	0.103724	0.00689702	0.00723544	0.0145482	0	0	0.0362461	0.00544591	6.65566	0.0333005
ENSMUSG00000050822	Slc29a4	solute carrier family 29 (nucleoside transporters), member 4 [Source:MGI Symbol;Acc:MGI:2385330]	350	278	736	373	306	213	368	290	6.60201	5.66431	15.0879	7.62321	6.56589	4.59291	6.39028	6.21984	8.74436	5.94223	1.47156	0.0470563
ENSMUSG00000028645	Slc2a1	solute carrier family 2 (facilitated glucose transporter), member 1 [Source:MGI Symbol;Acc:MGI:95755]	2790	1990	2659	2278	3513	3170	3280	2381	27.6165	21.2771	28.6039	24.4309	39.5555	35.8693	29.8884	26.7976	25.4821	33.0277	0.771536	0.00693666
ENSMUSG00000050473	Slc35d3	solute carrier family 35, member D3 [Source:MGI Symbol;Acc:MGI:1923407]	20	27	14	12	39	26	48	19	0.413553	0.603052	0.314613	0.268833	0.917342	0.614579	0.913689	0.446699	0.400013	0.723077	0.553209	0.0152139
ENSMUSG00000042202	Slc35e2	solute carrier family 35, member E2 [Source:MGI Symbol;Acc:MGI:2444240]	773	296	607	323	306	377	258	270	4.31459	1.78462	3.68207	1.95336	1.94288	2.40547	1.32569	1.71355	2.93366	1.8469	1.58843	0.0180273
ENSMUSG00000046822	Slc39a3	solute carrier family 39 (zinc transporter), member 3 [Source:MGI Symbol;Acc:MGI:2147269]	1736	1708	1331	1311	1224	899	1149	1053	8.4224	8.95093	7.0179	6.89143	6.75511	4.98592	5.1318	5.80881	7.82067	5.67041	1.37921	0.00399616
ENSMUSG00000038178	Slc43a2	solute carrier family 43, member 2 [Source:MGI Symbol;Acc:MGI:2442746]	822	685	825	955	604	275	813	238	2.46562	2.21942	2.68938	3.1037	2.0609	0.942947	2.24497	0.811717	2.61953	1.51513	1.72891	0.00604317
ENSMUSG00000026435	Slc45a3	solute carrier family 45, member 3 [Source:MGI Symbol;Acc:MGI:1922082]	25	8	22	15	6	9	2	13	0.20029	0.0692301	0.19155	0.130203	0.0546804	0.0824225	0.0147488	0.118419	0.147818	0.0675676	2.18771	0.0406014
ENSMUSG00000089774	Slc5a3	solute carrier family 5 (inositol transporters), member 3 [Source:MGI Symbol;Acc:MGI:1858226]	645	496	526	578	291	367	578	400	3.06771	2.54818	2.71884	2.97854	1.57439	1.99535	2.53074	2.16316	2.82832	2.06591	1.36904	0.0152662
ENSMUSG00000028542	Slc6a9	solute carrier family 6 (neurotransmitter transporter, glycine), member 9 [Source:MGI Symbol;Acc:MGI:95760]	726	584	585	594	411	417	527	386	4.03981	3.5102	3.53772	3.58124	2.60154	2.65253	2.6996	2.44222	3.66724	2.59898	1.41103	0.00112875
ENSMUSG00000031297	Slc7a3	solute carrier family 7 (cationic amino acid transporter, y+ system), member 3 [Source:MGI Symbol;Acc:MGI:1100521]	189	178	163	127	117	118	105	119	1.69494	1.72428	1.58863	1.23401	1.19356	1.2097	0.866852	1.21343	1.56047	1.12089	1.39217	0.0346825
ENSMUSG00000032754	Slc8b1	solute carrier family 8 (sodium/lithium/calcium exchanger), member B1 [Source:MGI Symbol;Acc:MGI:2180781]	117	113	66	122	59	90	73	46	0.938444	0.97903	0.575319	1.06024	0.538319	0.825207	0.539028	0.419524	0.888258	0.58052	1.53011	0.0375573
ENSMUSG00000030235	Slco1c1	solute carrier organic anion transporter family, member 1c1 [Source:MGI Symbol;Acc:MGI:1889679]	882	698	864	709	571	559	785	591	5.61187	4.79721	5.97442	4.88773	4.13276	4.06584	4.59804	4.27563	5.31781	4.26807	1.24595	0.0489793
ENSMUSG00000072620	Slfn2	schlafen 2 [Source:MGI Symbol;Acc:MGI:1313258]	35	51	40	72	78	82	80	53	1.14385	1.80038	1.4207	2.54949	2.89973	3.06346	2.40687	1.96948	1.72861	2.58488	0.668736	0.0311336
ENSMUSG00000031558	Slit2	slit guidance ligand 2 [Source:MGI Symbol;Acc:MGI:1315205]	1074	628	631	781	441	539	673	563	1.62383	1.02563	1.03683	1.27941	0.758473	0.93159	0.936733	0.967873	1.24143	0.898667	1.38141	0.0140353
ENSMUSG00000024921	Smarca2	SWI/SNF related, matrix associated, actin dependent regulator of chromatin, subfamily a, member 2 [Source:MGI Symbol;Acc:MGI:99603]	3118	2916	2977	3369	2006	2593	2706	2516	6.84961	6.91946	7.10741	8.01885	5.01286	6.51167	5.47245	6.28454	7.22383	5.82038	1.24113	0.0405554
ENSMUSG00000085763	Smc2os	structural maintenance of chromosomes 2, opposite strand [Source:MGI Symbol;Acc:MGI:1919898]	9	6	11	7	11	11	16	22	0.781858	0.56302	1.03848	0.658888	1.08706	1.09238	1.27958	2.17307	0.760562	1.40802	0.540163	0.0346587
ENSMUSG00000092349	Smim40	small integral membrane protein 40 [Source:MGI Symbol;Acc:MGI:3054967]	7	11	2	4	17	14	8	10	0.471727	0.800693	0.146452	0.292041	1.30311	1.07849	0.496293	0.766247	0.427728	0.911035	0.469497	0.0329953
ENSMUSG00000075408	Smim41	small integral membrane protein 41 [Source:MGI Symbol;Acc:MGI:1924967]	2	0	8	2	9	6	6	10	0.0350609	0	0.152421	0.0379879	0.179483	0.120235	0.0968387	0.199343	0.0563674	0.148975	0.378369	0.0392687
ENSMUSG00000047793	Sned1	sushi, nidogen and EGF-like domains 1 [Source:MGI Symbol;Acc:MGI:3045960]	130	99	134	121	85	75	68	47	0.628801	0.517249	0.7044	0.634127	0.467684	0.414698	0.302793	0.258491	0.621144	0.360916	1.72102	0.00201499
ENSMUSG00000096956	Snhg18	small nucleolar RNA host gene 18 [Source:MGI Symbol;Acc:MGI:1914085]	24	19	26	13	43	33	32	34	0.878306	0.751073	1.03406	0.515464	1.79007	1.38054	1.07808	1.41476	0.794726	1.41586	0.561302	0.00718474
ENSMUSG00000044772	Sntn	sentan, cilia apical structure protein [Source:MGI Symbol;Acc:MGI:3045373]	4	2	14	8	1	0	0	0	0.175418	0.0947448	0.667283	0.380124	0.049872	0	0	0	0.329392	0.012468	26.419	7.04e-05
ENSMUSG00000033006	Sox10	SRY (sex determining region Y)-box 10 [Source:MGI Symbol;Acc:MGI:98358]	823	647	998	648	427	467	565	466	7.11093	6.03844	9.37129	6.06628	4.1968	4.61257	4.49406	4.5781	7.14673	4.47038	1.59869	8.58e-05
ENSMUSG00000051817	Sox12	SRY (sex determining region Y)-box 12 [Source:MGI Symbol;Acc:MGI:98360]	440	424	522	406	344	308	354	352	2.77522	2.88872	3.57815	2.77455	2.46813	2.22073	2.05547	2.52442	3.00416	2.31719	1.29647	0.0295823
ENSMUSG00000074637	Sox2	SRY (sex determining region Y)-box 2 [Source:MGI Symbol;Acc:MGI:98364]	673	679	622	626	483	474	573	480	17.7924	19.3902	17.8711	17.9314	14.5255	14.3251	13.9456	14.4289	18.2463	14.3063	1.27541	0.0185782
ENSMUSG00000061517	Sox21	SRY (sex determining region Y)-box 21 [Source:MGI Symbol;Acc:MGI:2654070]	266	237	253	240	199	171	205	148	3.80773	3.6646	3.93593	3.72235	3.24042	2.79821	2.70148	2.4089	3.78265	2.78725	1.35713	0.0212648
ENSMUSG00000105265	Sox2ot	SOX2 overlapping transcript (non-protein coding) [Source:MGI Symbol;Acc:MGI:2444112]	79	86	60	400	51	54	60	63	0.227515	0.267531	0.18779	1.24814	0.167076	0.177777	0.159074	0.206297	0.482744	0.177556	2.71883	0.00420641
ENSMUSG00000075304	Sp5	trans-acting transcription factor 5 [Source:MGI Symbol;Acc:MGI:1927715]	3	6	4	5	3	0	1	0	0.0776979	0.167834	0.112559	0.140298	0.088374	0	0.0238485	0	0.124597	0.0280556	4.44107	0.0148928
ENSMUSG00000027867	Spag17	sperm associated antigen 17 [Source:MGI Symbol;Acc:MGI:1921612]	17	6	6	10	1	5	4	1	0.0977147	0.037253	0.0374825	0.0622758	0.00653645	0.0328569	0.0211637	0.00653655	0.0586815	0.0167734	3.49849	0.00522619
ENSMUSG00000066196	Spag8	sperm associated antigen 8 [Source:MGI Symbol;Acc:MGI:3056295]	25	12	24	23	20	7	5	8	0.730166	0.378572	0.761776	0.727804	0.664444	0.233695	0.134432	0.265669	0.64958	0.32456	2.00142	0.0411233
ENSMUSG00000029155	Spata18	spermatogenesis associated 18 [Source:MGI Symbol;Acc:MGI:1920722]	5	2	11	14	4	0	0	0	0.0837465	0.0361822	0.200212	0.254058	0.0762016	0	0	0	0.14355	0.0190504	7.53527	0.00257895
ENSMUSG00000073119	Speer4a	spermatogenesis associated glutamate (E)-rich protein 4A [Source:MGI Symbol;Acc:MGI:1922907]	0	0	0	0	3	2	1	1	0	0	0	0	0.062277	0.041726	0.016806	0.0207524	0	0.0353904	0	0.0242052
ENSMUSG00000033735	Spr	sepiapterin reductase [Source:MGI Symbol;Acc:MGI:103078]	569	434	566	505	394	322	413	419	5.28853	4.35719	5.71719	5.08552	4.16566	3.4212	3.53375	4.42802	5.11211	3.88716	1.31513	0.0210423
ENSMUSG00000086219	Srrm4os	serine/arginine repetitive matrix 4, opposite strand [Source:MGI Symbol;Acc:MGI:1924048]	12	22	5	6	3	5	5	2	0.174713	0.346002	0.0791241	0.0946493	0.0496882	0.0832286	0.0670178	0.033115	0.173622	0.0582624	2.98001	0.0133776
ENSMUSG00000047904	Sstr2	somatostatin receptor 2 [Source:MGI Symbol;Acc:MGI:98328]	184	141	175	153	102	115	162	91	2.11951	1.75441	2.19079	1.90956	1.33655	1.51431	1.7179	1.19188	1.99357	1.44016	1.38427	0.0387318
ENSMUSG00000050824	Sstr5	somatostatin receptor 5 [Source:MGI Symbol;Acc:MGI:894282]	13	9	3	11	1	5	5	4	0.134942	0.100912	0.0338386	0.123715	0.011804	0.0593355	0.0477785	0.0472051	0.0983517	0.0415308	2.36816	0.0447552
ENSMUSG00000033740	St18	suppression of tumorigenicity 18 [Source:MGI Symbol;Acc:MGI:2446700]	556	393	443	525	299	245	294	457	2.28612	1.74546	1.97957	2.33886	1.39849	1.15157	1.11285	2.13655	2.0875	1.44986	1.43979	0.0169361
ENSMUSG00000079442	St6galnac4	ST6 (alpha-N-acetyl-neuraminyl-2,3-beta-galactosyl-1,3)-N-acetylgalactosaminide alpha-2,6-sialyltransferase 4 [Source:MGI Symbol;Acc:MGI:1341894]	626	521	635	562	464	531	462	288	3.19802	2.87501	3.52552	3.11075	2.69643	3.101	2.17276	1.67291	3.17732	2.41078	1.31797	0.0488463
ENSMUSG00000026389	Steap3	STEAP family member 3 [Source:MGI Symbol;Acc:MGI:1915678]	130	104	135	109	57	82	84	86	0.691066	0.597179	0.779928	0.627806	0.344678	0.498298	0.411077	0.519814	0.673995	0.443467	1.51983	0.0112017
ENSMUSG00000030987	Stim1	stromal interaction molecule 1 [Source:MGI Symbol;Acc:MGI:107476]	726	1291	455	1386	1394	1343	1552	1258	2.3886	4.58804	1.6269	4.94072	5.21715	5.05105	4.70069	4.70609	3.38607	4.91875	0.6884	0.0269968
ENSMUSG00000027744	Stoml3	stomatin (Epb7.2)-like 3 [Source:MGI Symbol;Acc:MGI:2388072]	21	16	17	39	3	0	0	0	0.490338	0.40355	0.431392	0.986662	0.0796846	0	0	0	0.577986	0.0199211	29.0137	1.06e-11
ENSMUSG00000030711	Sult1a1	sulfotransferase family 1A, phenol-preferring, member 1 [Source:MGI Symbol;Acc:MGI:102896]	167	178	244	140	327	287	308	204	3.89607	4.48564	6.18647	3.53884	8.67806	7.65407	6.61493	5.41145	4.52675	7.08963	0.638504	0.00168224
ENSMUSG00000025538	Sumf2	sulfatase modifying factor 2 [Source:MGI Symbol;Acc:MGI:1915152]	174	213	136	175	125	102	118	130	2.40102	3.17483	2.03952	2.6164	1.9621	1.60896	1.49896	2.03968	2.55794	1.77742	1.43913	0.0217129
ENSMUSG00000043079	Synpo	synaptopodin [Source:MGI Symbol;Acc:MGI:1099446]	1234	2123	3424	3007	1986	1180	1003	985	2.07018	3.84714	6.24267	5.46573	3.78998	2.26295	1.54902	1.8789	4.40643	2.37021	1.85909	0.00324674
ENSMUSG00000056296	Synpr	synaptoporin [Source:MGI Symbol;Acc:MGI:1919253]	1934	970	882	2079	632	568	945	829	8.03102	4.35092	3.98039	9.35384	2.98535	2.69626	3.61252	3.91419	6.42904	3.30208	1.94697	0.000144778
ENSMUSG00000085255	Taco1os	translational activator of mitochondrially encoded cytochrome c oxidase I, opposite strand [Source:MGI Symbol;Acc:MGI:1915441]	8	4	7	3	18	8	9	9	0.675522	0.364856	0.642416	0.274514	1.72906	0.772224	0.699674	0.86416	0.489327	1.01628	0.481489	0.0372346
ENSMUSG00000048100	Taf13	TATA-box binding protein associated factor 13 [Source:MGI Symbol;Acc:MGI:1913500]	195	225	177	334	394	330	268	347	2.20787	2.7518	2.17799	4.09739	5.0746	4.27124	2.79343	4.46727	2.80876	4.15164	0.676544	0.0107041
ENSMUSG00000032419	Tbx18	T-box18 [Source:MGI Symbol;Acc:MGI:1923615]	10	15	19	22	22	29	24	31	0.113409	0.183759	0.234181	0.27034	0.283825	0.375974	0.250579	0.399763	0.200422	0.327535	0.611911	0.036532
ENSMUSG00000028523	Tctex1d1	Tctex1 domain containing 1 [Source:MGI Symbol;Acc:MGI:1914594]	4	5	16	2	0	0	0	0	0.0397221	0.0536357	0.172684	0.0215191	0	0	0	0	0.0718902	0	Inf	2.54e-05
ENSMUSG00000047671	Tctex1d4	Tctex1 domain containing 4 [Source:MGI Symbol;Acc:MGI:3045358]	16	13	17	8	4	1	0	6	0.407744	0.357846	0.470812	0.220878	0.115945	0.0291339	0	0.173848	0.36432	0.0797318	4.56932	0.0002604
ENSMUSG00000055320	Tead1	TEA domain family member 1 [Source:MGI Symbol;Acc:MGI:101876]	374	192	41	68	40	48	86	35	0.74676	0.4141	0.0889683	0.14711	0.0908522	0.109559	0.158079	0.0794599	0.349234	0.109487	3.18972	0.00127363
ENSMUSG00000042189	Tekt3	tektin 3 [Source:MGI Symbol;Acc:MGI:1918312]	2	0	2	2	0	0	0	0	0.0622191	0	0.0676127	0.0674132	0	0	0	0	0.0493113	0	Inf	0.0462176
ENSMUSG00000053453	Thoc7	THO complex 7 [Source:MGI Symbol;Acc:MGI:1913481]	320	315	330	282	312	455	443	429	1.68251	1.789	1.88566	1.60648	1.86606	2.73475	2.14424	2.5647	1.74091	2.32744	0.747995	0.00618004
ENSMUSG00000025519	Tktl2	transketolase-like 2 [Source:MGI Symbol;Acc:MGI:1921669]	5	2	1	3	7	4	13	5	0.0362276	0.015652	0.00787284	0.0235528	0.0576888	0.0331318	0.0867066	0.041187	0.0208263	0.0546786	0.380886	0.0309034
ENSMUSG00000033777	Tlr13	toll-like receptor 13 [Source:MGI Symbol;Acc:MGI:3045213]	54	62	44	57	122	97	77	48	0.667865	0.82829	0.591408	0.763826	1.71641	1.37141	0.876697	0.675005	0.712847	1.15988	0.614587	0.0152203
ENSMUSG00000044583	Tlr7	toll-like receptor 7 [Source:MGI Symbol;Acc:MGI:2176882]	59	26	41	50	87	157	70	64	0.278808	0.132715	0.210561	0.256003	0.467667	0.848109	0.30452	0.343878	0.219522	0.491044	0.447052	0.000700682
ENSMUSG00000038623	Tm6sf1	transmembrane 6 superfamily member 1 [Source:MGI Symbol;Acc:MGI:1933209]	131	151	135	141	174	167	193	176	0.691048	0.860414	0.773951	0.805891	1.04412	1.00705	0.937253	1.05566	0.782826	1.01102	0.774293	0.024072
ENSMUSG00000025591	Tma16	translation machinery associated 16 [Source:MGI Symbol;Acc:MGI:1913532]	212	205	214	148	270	212	319	209	1.07047	1.11811	1.17434	0.809693	1.55084	1.22369	1.48283	1.19993	1.04315	1.36432	0.764594	0.0261343
ENSMUSG00000020895	Tmem107	transmembrane protein 107 [Source:MGI Symbol;Acc:MGI:1914160]	95	98	99	96	56	42	62	83	1.24428	1.38649	1.4092	1.36235	0.83435	0.628846	0.747568	1.23609	1.35058	0.861712	1.56732	0.0132423
ENSMUSG00000034850	Tmem127	transmembrane protein 127 [Source:MGI Symbol;Acc:MGI:1916720]	2154	2036	178	2098	294	259	380	325	20.2067	20.6311	1.81473	21.3244	3.13734	2.77747	3.28169	3.46661	15.9942	3.16578	5.05222	7.38e-07
ENSMUSG00000055912	Tmem150a	transmembrane protein 150A [Source:MGI Symbol;Acc:MGI:2385244]	100	80	123	101	68	80	69	61	2.19281	1.8949	2.93122	2.39964	1.69619	2.00534	1.39288	1.52092	2.35464	1.65383	1.42375	0.0418926
ENSMUSG00000047045	Tmem164	transmembrane protein 164 [Source:MGI Symbol;Acc:MGI:2148020]	371	284	312	349	171	253	116	276	2.66838	2.20641	2.43877	2.71969	1.39905	2.08015	0.76806	2.25712	2.50831	1.6261	1.54254	0.0242661
ENSMUSG00000087370	Tmem170b	transmembrane protein 170B [Source:MGI Symbol;Acc:MGI:3647046]	143	130	128	131	106	115	1617	102	1.00085	0.98281	0.97361	0.993403	0.843921	0.920087	10.4185	0.811718	0.987667	3.24856	0.304032	0.00562013
ENSMUSG00000043164	Tmem212	transmembrane protein 212 [Source:MGI Symbol;Acc:MGI:2685410]	50	15	40	31	13	4	0	1	3.7976	1.23062	3.30174	2.55109	1.12316	0.347328	0	0.0863719	2.72027	0.389215	6.98911	1.32e-05
ENSMUSG00000048572	Tmem252	transmembrane protein 252 [Source:MGI Symbol;Acc:MGI:3583948]	71	51	80	48	163	119	111	66	0.767001	0.595119	0.939232	0.561827	2.00305	1.46956	1.10389	0.810694	0.715795	1.3468	0.531479	0.0014632
ENSMUSG00000106715	Tmem265	transmembrane protein 265 [Source:MGI Symbol;Acc:MGI:5613213]	8	3	13	19	5	2	3	4	0.295943	0.119881	0.522679	0.761561	0.210428	0.0845875	0.102175	0.168236	0.425016	0.141357	3.00669	0.0134129
ENSMUSG00000071719	Tmem28	transmembrane protein 28 [Source:MGI Symbol;Acc:MGI:3648377]	662	640	705	711	483	446	674	543	9.2097	9.61748	10.6591	10.7171	7.64361	7.09287	8.632	8.58934	10.0508	7.98945	1.25801	0.0400178
ENSMUSG00000022753	Tmem30c	transmembrane protein 30C [Source:MGI Symbol;Acc:MGI:1918277]	0	0	0	0	3	3	1	2	0	0	0	0	0.0401961	0.0403975	0.0108473	0.0267889	0	0.0295575	0	0.00764222
ENSMUSG00000037720	Tmem33	transmembrane protein 33 [Source:MGI Symbol;Acc:MGI:1915128]	810	865	521	749	712	1044	2004	943	2.75773	3.1811	1.92773	2.76293	2.75747	4.06318	6.28099	3.65049	2.65737	4.18803	0.634516	0.00212181
ENSMUSG00000026519	Tmem63a	transmembrane protein 63a [Source:MGI Symbol;Acc:MGI:2384789]	600	443	536	525	396	365	401	312	5.3499	4.2667	5.194	5.07194	4.01655	3.72038	3.29157	3.16316	4.97064	3.54792	1.401	0.00329285
ENSMUSG00000048108	Tmem72	transmembrane protein 72 [Source:MGI Symbol;Acc:MGI:2442707]	5	10	296	12	43	3	1	2	0.0154021	0.033272	0.990877	0.040047	0.150668	0.0105644	0.0028367	0.00700564	0.2699	0.0427686	6.3107	0.0278541
ENSMUSG00000073680	Tmem88b	transmembrane protein 88B [Source:MGI Symbol;Acc:MGI:2444329]	1343	1150	1055	1189	756	769	900	807	21.0414	19.4621	17.9636	20.1837	13.4736	13.7729	12.9809	14.3762	19.6627	13.6509	1.4404	0.000188627
ENSMUSG00000005628	Tmod4	tropomodulin 4 [Source:MGI Symbol;Acc:MGI:1355285]	2	1	2	2	14	6	2	4	0.0434168	0.0234498	0.0471804	0.0470413	0.345743	0.14889	0.039966	0.0987255	0.0402721	0.158331	0.254354	0.0160112
ENSMUSG00000016942	Tmprss6	transmembrane serine protease 6 [Source:MGI Symbol;Acc:MGI:1919003]	10	28	17	15	55	27	33	16	0.102064	0.308703	0.188572	0.165882	0.638584	0.315025	0.310073	0.185689	0.191305	0.362343	0.527967	0.0278602
ENSMUSG00000028364	Tnc	tenascin C [Source:MGI Symbol;Acc:MGI:101922]	48	26	57	29	9	2	25	28	0.329212	0.19262	0.424865	0.215506	0.0702177	0.0156821	0.157846	0.218355	0.290551	0.115525	2.51505	0.0121693
ENSMUSG00000024401	Tnf	tumor necrosis factor [Source:MGI Symbol;Acc:MGI:104798]	0	0	0	0	3	3	0	2	0	0	0	0	0.0609276	0.0612329	0	0.0406056	0	0.0406915	0	0.0187724
ENSMUSG00000053475	Tnfaip6	tumor necrosis factor alpha induced protein 6 [Source:MGI Symbol;Acc:MGI:1195266]	231	237	178	189	158	124	163	150	7.34631	8.1414	6.15204	6.51238	5.71583	4.50793	4.77209	5.424	7.03803	5.10496	1.37867	0.0247838
ENSMUSG00000028362	Tnfsf8	tumor necrosis factor (ligand) superfamily, member 8 [Source:MGI Symbol;Acc:MGI:88328]	3	2	2	6	15	20	2	3	0.0428594	0.0308599	0.0310447	0.0928592	0.243742	0.326586	0.0262976	0.0487331	0.0494058	0.16134	0.306222	0.0334675
ENSMUSG00000035458	Tnni3	troponin I, cardiac 3 [Source:MGI Symbol;Acc:MGI:98783]	5	5	2	5	1	1	1	1	0.0770325	0.0832037	0.0334807	0.0834633	0.0175188	0.0176124	0.0141875	0.0175191	0.0692951	0.0167094	4.14706	0.0164789
ENSMUSG00000061723	Tnnt3	troponin T3, skeletal, fast [Source:MGI Symbol;Acc:MGI:109550]	2	4	1	0	0	0	0	0	0.0362168	0.0782441	0.0196782	0	0	0	0	0	0.0335348	0	Inf	0.0404105
ENSMUSG00000045761	Togaram2	TOG array regulator of axonemal microtubules 2 [Source:MGI Symbol;Acc:MGI:2443498]	54	32	37	54	25	21	26	13	0.404491	0.258917	0.301207	0.438258	0.21302	0.179819	0.179289	0.11072	0.350718	0.170712	2.05445	0.00160938
ENSMUSG00000028998	Tomm7	translocase of outer mitochondrial membrane 7 [Source:MGI Symbol;Acc:MGI:1913419]	657	555	730	603	467	418	466	578	31.7589	28.9793	38.3501	31.5819	25.6792	23.0981	20.7372	31.7689	32.6675	25.3208	1.29014	0.0403785
ENSMUSG00000014846	Tppp3	tubulin polymerization-promoting protein family member 3 [Source:MGI Symbol;Acc:MGI:1915221]	513	433	543	442	877	466	724	772	10.1817	9.28292	11.7124	9.50487	19.8001	10.5727	13.2283	17.4218	10.1705	15.2557	0.666665	0.000761632
ENSMUSG00000060126	Tpt1	tumor protein, translationally-controlled 1 [Source:MGI Symbol;Acc:MGI:104890]	1002	1153	1173	998	1560	1206	1450	1281	11.2328	13.9619	14.291	12.122	19.8935	15.455	14.9642	16.3284	12.9019	16.6603	0.774413	0.00405825
ENSMUSG00000032536	Trak1	trafficking protein, kinesin binding 1 [Source:MGI Symbol;Acc:MGI:1914345]	1965	2160	1228	1857	2194	1718	3876	1926	5.26534	6.2519	3.57606	5.39134	6.68752	5.26243	9.56118	5.86804	5.12116	6.84479	0.748183	0.0235744
ENSMUSG00000071340	Trappc3l	trafficking protein particle complex 3 like [Source:MGI Symbol;Acc:MGI:3642034]	1	2	4	2	0	1	0	0	0.034218	0.073889	0.148663	0.0741122	0	0.0391017	0	0	0.0827205	0.00977544	8.46208	0.0390392
ENSMUSG00000032554	Trf	transferrin [Source:MGI Symbol;Acc:MGI:98821]	4816	4299	5863	4825	4794	3426	3019	3165	52.068	50.205	68.8887	56.5202	58.9586	42.342	30.0478	38.9073	56.9205	42.5639	1.33729	0.0305209
ENSMUSG00000033949	Trim36	tripartite motif-containing 36 [Source:MGI Symbol;Acc:MGI:106264]	174	206	126	155	102	104	118	110	1.59596	2.04095	1.25599	1.54037	1.06423	1.09044	0.996359	1.1472	1.60832	1.07456	1.49672	0.0100051
ENSMUSG00000034317	Trim59	tripartite motif-containing 59 [Source:MGI Symbol;Acc:MGI:1914199]	261	289	240	287	150	153	181	197	2.74379	3.28173	2.74198	3.26899	1.79376	1.83867	1.75167	2.35478	3.00912	1.93472	1.55533	0.00104165
ENSMUSG00000021569	Trip13	thyroid hormone receptor interactor 13 [Source:MGI Symbol;Acc:MGI:1916966]	4	10	13	9	22	9	26	12	0.0470818	0.127147	0.166307	0.114784	0.294576	0.1211	0.28174	0.160603	0.11383	0.214505	0.530664	0.036591
ENSMUSG00000068735	Trp53i11	transformation related protein 53 inducible protein 11 [Source:MGI Symbol;Acc:MGI:2670995]	550	561	599	549	964	429	625	1027	2.88316	3.17661	3.41253	3.11817	5.74842	2.57077	3.01614	6.12139	3.14762	4.36418	0.72124	0.0293587
ENSMUSG00000028211	Trp53inp1	transformation related protein 53 inducible nuclear protein 1 [Source:MGI Symbol;Acc:MGI:1926609]	246	222	195	300	321	360	348	305	1.85985	1.81297	1.60221	2.45745	2.76065	3.11132	2.42207	2.6219	1.93312	2.72899	0.708366	0.0033611
ENSMUSG00000100254	Trpc2	transient receptor potential cation channel, subfamily C, member 2 [Source:MGI Symbol;Acc:MGI:109527]	0	0	0	0	0	0	23	0	0	0	0	0	0	0	0.400641	0	0	0.10016	0	0.0120883
ENSMUSG00000024727	Trpm6	transient receptor potential cation channel, subfamily M, member 6 [Source:MGI Symbol;Acc:MGI:2675603]	7	6	6	5	11	19	9	10	0.0453952	0.0420285	0.0422874	0.035133	0.0811472	0.140847	0.0537313	0.0737373	0.041211	0.0873656	0.471708	0.017869
ENSMUSG00000031893	Tsnaxip1	translin-associated factor X (Tsnax) interacting protein 1 [Source:MGI Symbol;Acc:MGI:1919486]	3	1	8	9	0	0	3	0	0.0599433	0.0215804	0.173699	0.194821	0	0	0.0551788	0	0.112511	0.0137947	8.15609	0.00987601
ENSMUSG00000037824	Tspan14	tetraspanin 14 [Source:MGI Symbol;Acc:MGI:1196325]	674	536	571	583	413	432	567	423	7.74747	6.65517	7.13311	7.26089	5.40026	5.67653	5.99994	5.52858	7.19916	5.65133	1.27389	0.0270162
ENSMUSG00000028152	Tspan5	tetraspanin 5 [Source:MGI Symbol;Acc:MGI:1928096]	1516	3703	1485	3128	1531	1394	1801	1402	6.74488	17.796	7.18033	15.0787	7.74845	7.08986	7.37654	7.09244	11.7	7.32682	1.59687	0.0111305
ENSMUSG00000034156	Tspoap1	TSPO associated protein 1 [Source:MGI Symbol;Acc:MGI:2450877]	2490	2258	2295	1975	1875	1558	1723	1418	10.4726	10.2582	10.4901	9	8.97057	7.49068	6.67119	6.78115	10.0552	7.4784	1.34457	0.00446651
ENSMUSG00000032514	Ttc21a	tetratricopeptide repeat domain 21A [Source:MGI Symbol;Acc:MGI:1921302]	23	6	30	35	11	10	7	6	0.194579	0.0548305	0.275832	0.320825	0.105865	0.0967106	0.0545156	0.057715	0.211517	0.0787016	2.68758	0.00615118
ENSMUSG00000034714	Ttyh2	tweety family member 2 [Source:MGI Symbol;Acc:MGI:2157091]	680	547	631	575	366	387	454	376	9.22643	8.0169	9.3046	8.45306	5.64899	6.00254	5.67081	5.80077	8.75025	5.78078	1.51368	6.45e-05
ENSMUSG00000020087	Tysnd1	trypsin domain containing 1 [Source:MGI Symbol;Acc:MGI:1919017]	434	390	501	377	279	290	374	339	7.25981	7.04685	9.10786	6.83279	5.30891	5.54542	5.75932	6.44775	7.56182	5.76535	1.3116	0.026814
ENSMUSG00000022674	Ube2v2	ubiquitin-conjugating enzyme E2 variant 2 [Source:MGI Symbol;Acc:MGI:1917870]	102	706	204	114	53	150	91	141	0.581439	4.34714	1.26379	0.704097	0.343672	0.977453	0.477541	0.913898	1.72412	0.678141	2.54242	0.0115359
ENSMUSG00000025326	Ube3a	ubiquitin protein ligase E3A [Source:MGI Symbol;Acc:MGI:105098]	464	396	331	454	326	605	741	525	0.868521	0.800666	0.673337	0.920744	0.694136	1.29454	1.27686	1.11736	0.815817	1.09573	0.744544	0.0194878
ENSMUSG00000089675	Ugt1a8	UDP glucuronosyltransferase 1 family, polypeptide A8 [Source:MGI Symbol;Acc:MGI:3576090]	0	0	0	0	0	5	0	7	0	0	0	0	0	0.139586	0	0.194358	0	0.083486	0	0.0122516
ENSMUSG00000032854	Ugt8a	UDP galactosyltransferase 8A [Source:MGI Symbol;Acc:MGI:109522]	935	740	629	849	360	474	641	516	6.08435	5.2015	4.44832	5.98592	2.66483	3.52598	3.83994	3.8179	5.43002	3.46216	1.56839	0.000273684
ENSMUSG00000024817	Uhrf2	ubiquitin-like, containing PHD and RING finger domains 2 [Source:MGI Symbol;Acc:MGI:1923718]	878	861	806	857	559	637	639	761	4.10234	4.34545	4.09275	4.33849	2.97108	3.40233	2.74854	4.04292	4.21976	3.29122	1.28213	0.0290445
ENSMUSG00000020099	Unc5b	unc-5 netrin receptor B [Source:MGI Symbol;Acc:MGI:894703]	715	424	424	530	341	347	479	354	3.84408	2.46233	2.4774	3.08734	2.08548	2.13263	2.37075	2.16403	2.96779	2.18822	1.35625	0.0218952
ENSMUSG00000028186	Uox	urate oxidase [Source:MGI Symbol;Acc:MGI:98907]	9	3	3	12	2	0	2	1	0.0753221	0.0271199	0.0272823	0.108807	0.0190434	0	0.015407	0.00951712	0.0596329	0.0109919	5.42517	0.00450387
ENSMUSG00000033427	Upb1	ureidopropionase, beta [Source:MGI Symbol;Acc:MGI:2143535]	0	0	3	1	9	3	5	4	0	0	0.0232774	0.00774013	0.0731035	0.0244899	0.0328666	0.0324721	0.00775438	0.040733	0.190371	0.00708288
ENSMUSG00000020163	Uqcr11	ubiquinol-cytochrome c reductase, complex III subunit XI [Source:MGI Symbol;Acc:MGI:1913844]	1130	848	1328	1060	677	691	899	877	55.4115	44.9171	70.7722	56.3181	37.7637	38.7346	40.5831	48.8983	56.8547	41.4949	1.37016	0.00876212
ENSMUSG00000032376	Usp3	ubiquitin specific peptidase 3 [Source:MGI Symbol;Acc:MGI:2152450]	369	351	268	259	421	407	425	377	1.40122	1.43973	1.106	1.06562	1.81855	1.76675	1.48571	1.62777	1.25314	1.67469	0.748281	0.00654411
ENSMUSG00000027364	Usp50	ubiquitin specific peptidase 50 [Source:MGI Symbol;Acc:MGI:1922333]	14	7	214	6	8	11	13	16	0.163243	0.088163	2.71176	0.0757965	0.106114	0.146618	0.139541	0.212125	0.759741	0.1511	5.02808	0.0105731
ENSMUSG00000039701	Usp53	ubiquitin specific peptidase 53 [Source:MGI Symbol;Acc:MGI:2139607]	400	381	252	432	483	480	476	407	1.32211	1.36028	0.905212	1.54708	1.81601	1.81363	1.44837	1.52959	1.28367	1.6519	0.777086	0.0271695
ENSMUSG00000041264	Uspl1	ubiquitin specific peptidase like 1 [Source:MGI Symbol;Acc:MGI:2442342]	365	407	295	538	219	265	327	284	0.899788	1.08377	0.790338	1.43698	0.614123	0.74678	0.742095	0.796047	1.05272	0.724761	1.4525	0.0121836
ENSMUSG00000037428	Vgf	VGF nerve growth factor inducible [Source:MGI Symbol;Acc:MGI:1343180]	5426	4250	5967	4399	1502	1488	1836	3989	50.3627	42.6101	60.1906	44.2389	15.8586	15.7882	15.6879	42.0985	49.3506	22.3583	2.20726	3.76e-05
ENSMUSG00000019772	Vip	vasoactive intestinal polypeptide [Source:MGI Symbol;Acc:MGI:98933]	402	436	313	372	399	452	662	463	5.83906	6.84066	4.94088	5.85439	6.59256	7.50507	8.85195	7.64664	5.86875	7.64906	0.767251	0.0102799
ENSMUSG00000066735	Vkorc1l1	vitamin K epoxide reductase complex, subunit 1-like 1 [Source:MGI Symbol;Acc:MGI:1916818]	976	1416	1364	749	990	680	827	653	5.58877	8.75839	8.48836	4.64696	6.44861	4.45118	4.35949	4.2516	6.87062	4.87772	1.40857	0.0260883
ENSMUSG00000039257	Vstm2b	V-set and transmembrane domain containing 2B [Source:MGI Symbol;Acc:MGI:1914525]	1051	781	574	869	699	478	581	591	13.106	10.5199	7.77897	11.7411	9.91536	6.81388	6.66971	8.37968	10.7865	7.94466	1.3577	0.0264911
ENSMUSG00000028753	Vwa5b1	von Willebrand factor A domain containing 5B1 [Source:MGI Symbol;Acc:MGI:1922968]	22	22	93	50	27	10	23	17	0.133008	0.143671	0.611054	0.327524	0.185689	0.0691113	0.128009	0.116864	0.303814	0.124918	2.4321	0.0103543
ENSMUSG00000001930	Vwf	Von Willebrand factor [Source:MGI Symbol;Acc:MGI:98941]	315	257	230	309	1108	609	477	220	0.863898	0.761341	0.685525	0.918189	3.45666	1.90928	1.2043	0.686038	0.807238	1.81407	0.444988	0.000406198
ENSMUSG00000104301	Wdr49	WD repeat domain 49 [Source:MGI Symbol;Acc:MGI:3645287]	2	2	3	5	0	1	1	0	0.0181507	0.0196067	0.0295862	0.0491698	0	0.0103758	0.00835813	0	0.0291284	0.00468348	6.21938	0.0263699
ENSMUSG00000043020	Wdr63	WD repeat domain 63 [Source:MGI Symbol;Acc:MGI:3045269]	3	6	26	24	12	0	0	0	0.0441346	0.0953342	0.415638	0.382505	0.200796	0	0	0	0.234403	0.0501989	4.66948	0.046579
ENSMUSG00000045374	Wdr81	WD repeat domain 81 [Source:MGI Symbol;Acc:MGI:2681828]	593	553	570	672	359	520	442	458	2.41073	2.42836	2.51833	2.95995	1.66017	2.41656	1.65417	2.11706	2.57934	1.96199	1.31466	0.0286628
ENSMUSG00000030093	Wnt7a	wingless-type MMTV integration site family, member 7A [Source:MGI Symbol;Acc:MGI:98961]	330	236	249	292	136	213	249	206	4.77032	3.68502	3.9118	4.57339	2.23634	3.51976	3.31358	3.38591	4.23513	3.1139	1.36007	0.0415372
ENSMUSG00000024066	Xdh	xanthine dehydrogenase [Source:MGI Symbol;Acc:MGI:98973]	244	214	225	267	376	284	394	231	1.12987	1.0704	1.1323	1.33958	1.98057	1.50333	1.67957	1.21625	1.16804	1.59493	0.732345	0.00947289
ENSMUSG00000067768	Xlr4b	X-linked lymphocyte-regulated 4B [Source:MGI Symbol;Acc:MGI:1350975]	1	0	3	1	6	3	5	3	0.0127297	0	0.0414788	0.0137924	0.0868439	0.0436395	0.0585661	0.0434082	0.0170002	0.0581144	0.29253	0.0383197
ENSMUSG00000070425	Xntrpc	Xndc1-transient receptor potential cation channel, subfamily C, member 2 readthrough [Source:MGI Symbol;Acc:MGI:5546370]	21	25	33	30	15	13	6	17	0.150659	0.193739	0.2573	0.233197	0.122418	0.106619	0.0396298	0.13868	0.208724	0.101837	2.04959	0.00861571
ENSMUSG00000028933	Xrcc2	X-ray repair complementing defective repair in Chinese hamster cells 2 [Source:MGI Symbol;Acc:MGI:1927345]	133	126	126	121	62	74	110	94	1.15558	1.18253	1.18977	1.13908	0.61278	0.734986	0.879838	0.928642	1.16674	0.789062	1.47864	0.0146529
ENSMUSG00000041215	Yeats2	YEATS domain containing 2 [Source:MGI Symbol;Acc:MGI:2447762]	451	408	358	342	320	243	328	250	1.61229	1.57551	1.39089	1.32469	1.30131	0.993053	1.07945	1.0162	1.47585	1.09751	1.34473	0.0179248
ENSMUSG00000018427	Ypel2	yippee like 2 [Source:MGI Symbol;Acc:MGI:1925114]	653	504	556	574	393	383	577	424	6.89138	5.74536	6.37691	6.56336	4.71791	4.62053	5.60573	5.08782	6.39425	5.008	1.27681	0.0338048
ENSMUSG00000063935	Zar1	zygote arrest 1 [Source:MGI Symbol;Acc:MGI:2180337]	1	6	1	1	0	0	0	0	0.0116229	0.0752939	0.0126241	0.0125932	0	0	0	0	0.0280335	0	Inf	0.0169848
ENSMUSG00000034173	Zbed5	zinc finger, BED type containing 5 [Source:MGI Symbol;Acc:MGI:1919220]	1133	915	1033	963	604	584	881	891	11.6276	10.1432	11.5213	10.708	7.05116	6.85128	8.32337	10.397	11	8.15571	1.34875	0.0112431
ENSMUSG00000071661	Zbtb3	zinc finger and BTB domain containing 3 [Source:MGI Symbol;Acc:MGI:1922541]	101	94	88	81	50	44	52	58	2.74081	2.75535	2.59526	2.38157	1.54344	1.36493	1.29904	1.7896	2.61825	1.49925	1.74637	0.00063651
ENSMUSG00000060862	Zbtb40	zinc finger and BTB domain containing 40 [Source:MGI Symbol;Acc:MGI:2682254]	177	190	210	190	96	129	146	134	0.800198	0.927836	1.03178	0.930677	0.493696	0.666674	0.607633	0.688815	0.922622	0.614204	1.50214	0.00525821
ENSMUSG00000068962	Zfp114	zinc finger protein 114 [Source:MGI Symbol;Acc:MGI:3037815]	9	35	17	36	25	37	64	50	0.0661767	0.277983	0.135845	0.286797	0.209103	0.311002	0.43321	0.418021	0.1917	0.342834	0.559164	0.0352354
ENSMUSG00000022811	Zfp148	zinc finger protein 148 [Source:MGI Symbol;Acc:MGI:1332234]	1906	2009	1364	1877	654	840	1022	1793	6.71536	7.64576	5.2228	7.16526	2.62113	3.38318	3.31483	7.1829	6.68729	4.12551	1.62096	0.00744735
ENSMUSG00000062040	Zfp27	zinc finger protein 27 [Source:MGI Symbol;Acc:MGI:99174]	342	152	293	186	147	168	163	178	1.45963	0.700734	1.35902	0.860099	0.713668	0.819641	0.640423	0.863792	1.09487	0.759381	1.44179	0.0448766
ENSMUSG00000085436	Zfp335os	zinc finger protein 335, opposite strand [Source:MGI Symbol;Acc:MGI:3649775]	57	45	27	38	58	71	66	49	1.92652	1.64287	0.991739	1.39158	2.22993	2.74317	2.05353	1.88306	1.48818	2.22742	0.668116	0.0286479
ENSMUSG00000021127	Zfp36l1	zinc finger protein 36, C3H type-like 1 [Source:MGI Symbol;Acc:MGI:107946]	408	383	448	457	328	334	344	286	3.85137	3.90524	4.59596	4.67404	3.52204	3.60413	2.98935	3.06969	4.25665	3.2963	1.29134	0.0320456
ENSMUSG00000059475	Zfp426	zinc finger protein 426 [Source:MGI Symbol;Acc:MGI:1920248]	192	277	214	369	276	318	402	371	0.742572	1.15721	0.899485	1.54627	1.21426	1.40593	1.43129	1.63149	1.08638	1.42074	0.764659	0.049285
ENSMUSG00000043903	Zfp469	zinc finger protein 469 [Source:MGI Symbol;Acc:MGI:2684868]	47	9	36	50	8	11	18	10	0.161206	0.0333444	0.134192	0.185814	0.0312151	0.0431301	0.0568358	0.039001	0.128639	0.0425455	3.02356	0.00106113
ENSMUSG00000046886	Zfp474	zinc finger protein 474 [Source:MGI Symbol;Acc:MGI:1914008]	5	2	2	8	0	0	0	0	0.103867	0.0448753	0.045144	0.180043	0	0	0	0	0.0934825	0	Inf	0.000257515
ENSMUSG00000074221	Zfp568	zinc finger protein 568 [Source:MGI Symbol;Acc:MGI:2142347]	40	53	39	28	20	22	32	22	0.178918	0.256071	0.189583	0.135696	0.10176	0.11249	0.131768	0.111889	0.190067	0.114477	1.66031	0.023772
ENSMUSG00000063535	Zfp773	zinc finger protein 773 [Source:MGI Symbol;Acc:MGI:1923623]	45	49	43	44	18	27	39	25	0.355176	0.417757	0.368843	0.376279	0.161613	0.243607	0.283376	0.224365	0.379514	0.22824	1.66278	0.0149028
ENSMUSG00000055228	Zfp935	zinc finger protein 935 [Source:MGI Symbol;Acc:MGI:1918758]	1	0	0	0	13	0	13	0	0.0333578	0	0	0	0.493061	0	0.399031	0	0.00833945	0.223023	0.0373928	0.00540412
ENSMUSG00000059142	Zfp945	zinc finger protein 945 [Source:MGI Symbol;Acc:MGI:2445132]	155	117	154	175	191	227	219	199	0.430346	0.350885	0.464674	0.526433	0.603229	0.720462	0.559748	0.62822	0.443084	0.627915	0.705644	0.00554391
ENSMUSG00000071266	Zfp946	zinc finger protein 946 [Source:MGI Symbol;Acc:MGI:1921399]	165	201	175	186	198	210	289	209	1.65096	2.17242	1.90298	2.01645	2.25364	2.40199	2.66204	2.37778	1.9357	2.42386	0.798602	0.0411494
ENSMUSG00000052446	Zfp961	zinc finger protein 961 [Source:MGI Symbol;Acc:MGI:3583954]	170	167	184	182	21	39	32	177	0.997185	1.05813	1.17297	1.15669	0.140125	0.261509	0.172801	1.18052	1.09624	0.438739	2.49863	0.00998226
ENSMUSG00000066000	Zfp979	zinc finger protein 979 [Source:MGI Symbol;Acc:MGI:2148252]	5	6	11	7	2	2	3	5	0.0403989	0.0523623	0.0965814	0.0612782	0.0183842	0.0184733	0.0223142	0.0459292	0.0626552	0.0262752	2.38457	0.0494936
ENSMUSG00000018820	Zfyve27	zinc finger, FYVE domain containing 27 [Source:MGI Symbol;Acc:MGI:1919602]	1004	1004	1011	954	684	624	1091	665	4.77934	5.16254	5.23033	4.92044	3.70387	3.39562	4.78105	3.5994	5.02316	3.86998	1.29798	0.0225599
ENSMUSG00000030757	Zkscan2	zinc finger with KRAB and SCAN domains 2 [Source:MGI Symbol;Acc:MGI:2444060]	294	265	245	224	364	320	363	230	1.24132	1.20858	1.12421	1.02472	1.74825	1.5445	1.41094	1.10417	1.14971	1.45196	0.791831	0.0416058
ENSMUSG00000063488	Zkscan7	zinc finger with KRAB and SCAN domains 7 [Source:MGI Symbol;Acc:MGI:3040678]	64	39	65	74	21	41	60	25	0.375372	0.24708	0.414319	0.470254	0.14011	0.274892	0.323963	0.166725	0.376757	0.226422	1.66395	0.0361395
ENSMUSG00000033545	Znrf1	zinc and ring finger 1 [Source:MGI Symbol;Acc:MGI:2177308]	549	1282	539	680	512	439	677	441	1.52581	3.84867	1.62802	2.04766	1.61869	1.39474	1.73213	1.39361	2.26254	1.53479	1.47417	0.0326862
